# Supplementary material
Source: PubMed Central journal article supplement (PMC11200328)
Supplement: NIHMS2000472-supplement-Supp_File_1.pdf [file NIHMS2000472-supplement-Supp_File_1.pdf]

# THE LANCET Oncology

## Supplementary appendix

This appendix formed part of the original submission and has been peer reviewed. We post it as supplied by the authors.

Supplement to: Johnston SRD, Toi M, O'Shaughnessy J, et al. Abemaciclib plus endocrine therapy for hormone receptor-positive, HER2-negative, node-positive, high-risk early breast cancer (monarchE): results from a preplanned interim analysis of a randomised, open-label, phase 3 trial. *Lancet Oncol* 2022; published online Dec 6. [https://doi.org/10.1016/S1470-2045\(22\)00694-5](https://doi.org/10.1016/S1470-2045(22)00694-5).

## Appendices

Figures

**Figure A1. monarchE study design.** Abbreviations: ALN=positive axillary lymph nodes; CPF=clinicopathological features; HER2=human epidermal receptor 2; HR=hormone receptor; ITT=intent-to-treat population; N=number of patients in the ITT population; R=randomized; SOC=standard of care

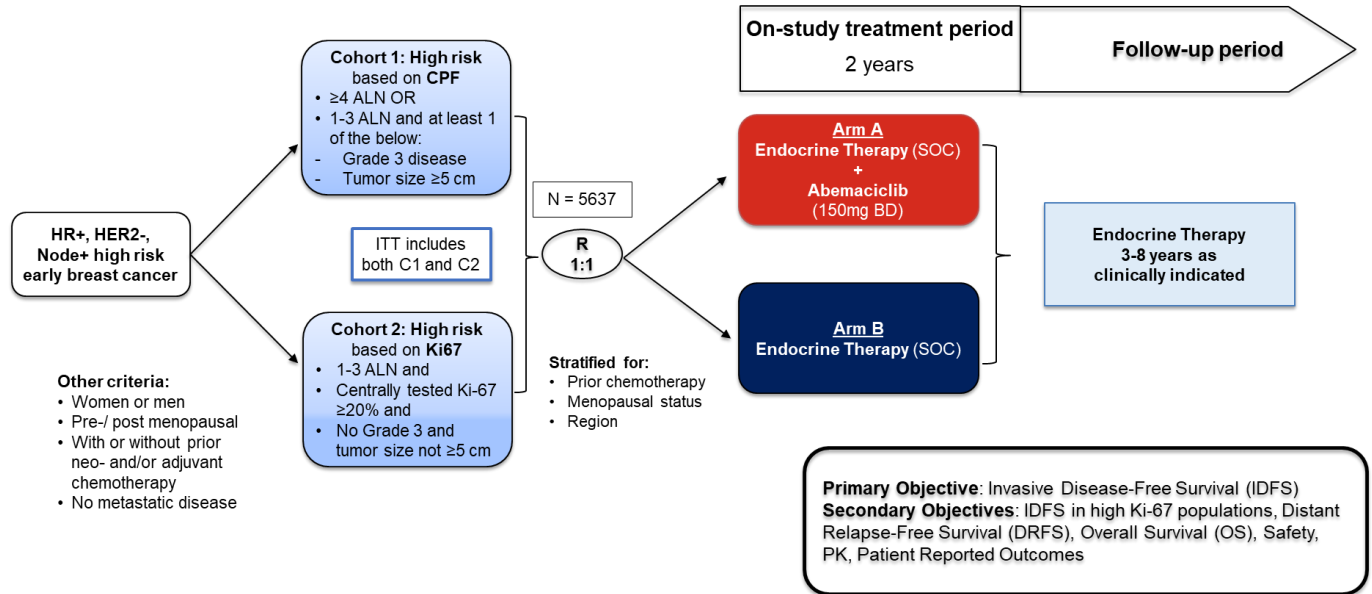

Figure A2. Assessment of Invasive Disease-Free Survival (IDFS) Proportional Hazard Assumption: Schoenfeld Residual plot (ITT Population)

**Assessment of Invasive Disease Free Survival (IDFS)  
Proportional Hazard Assumption: Schoenfeld residual plot  
(ITT Population)**

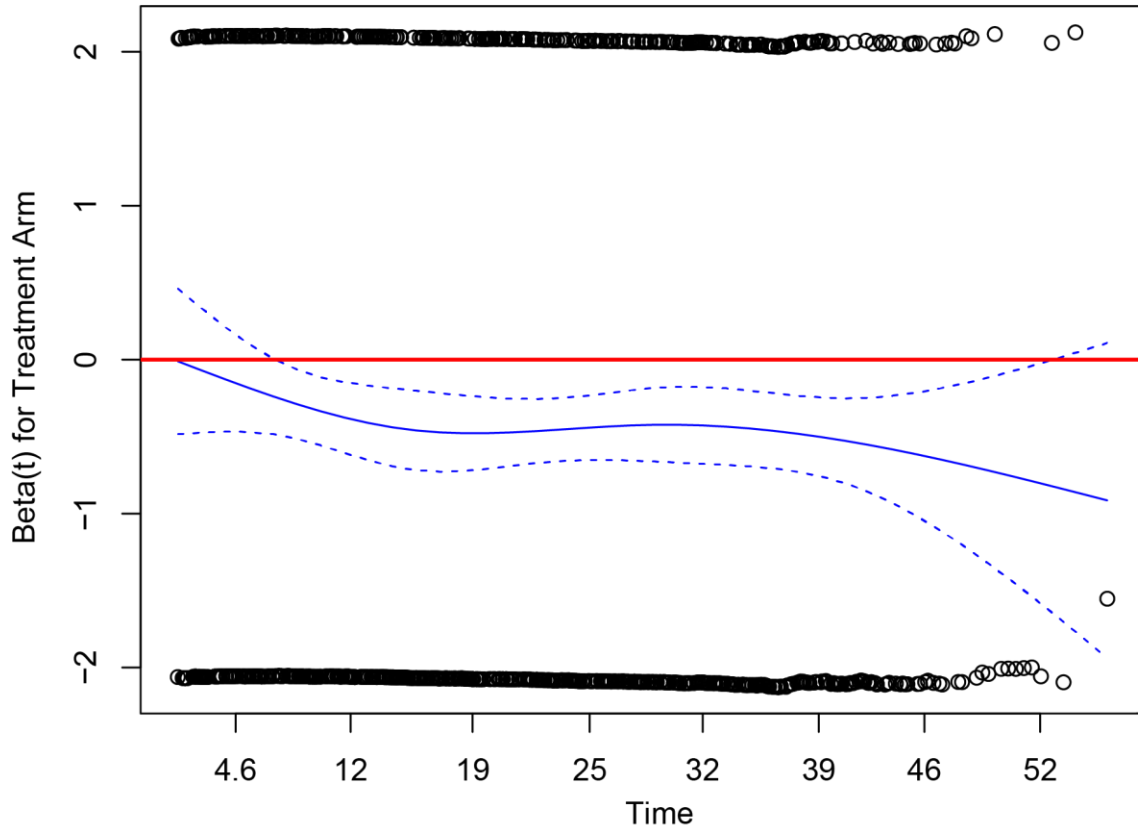

The Y axis represents the smoothed log HR.  
The solid blue line represents the weighted Schoenfeld residuals (smoothed log HR) over time, and the blue dotted line represents the corresponding confidence interval.  
The p-value for the global test of the slope=0 is 0.11.  
In addition, the p-value of test of the interaction of treatment over time within the time varying cox model is 0.11.

Figure A3. Kaplan-Meier curve for Cohort 1 population at OS IA2.

a. Invasive disease-free survival (IDFS)

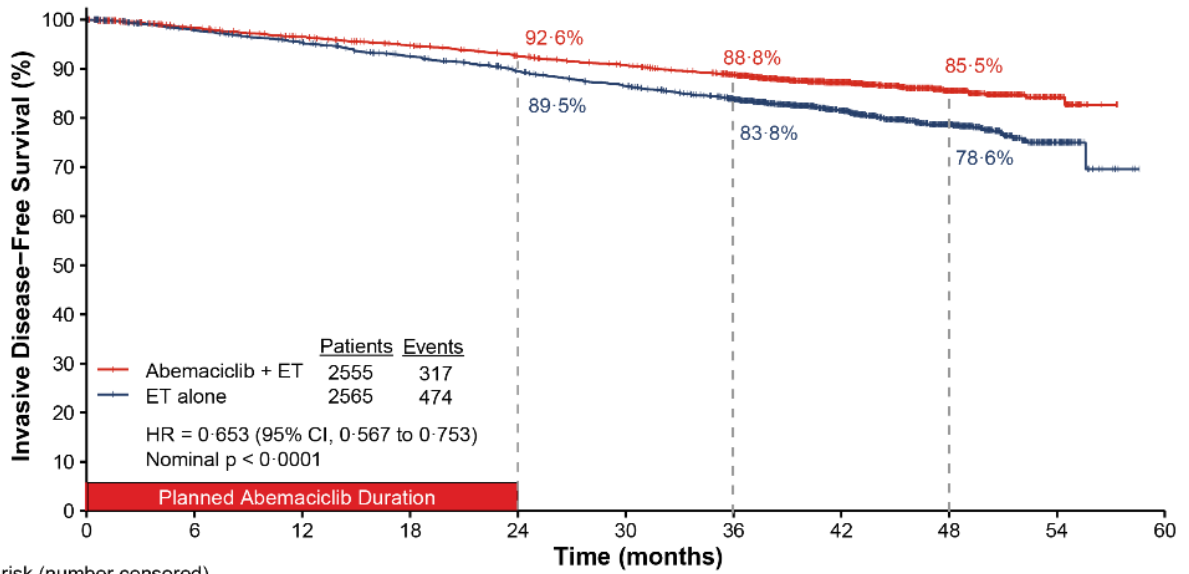

Number at risk (number censored)

|                  | 0        | 6          | 12         | 18         | 24         | 30         | 36         | 42          | 48         | 54        | 60       |
|------------------|----------|------------|------------|------------|------------|------------|------------|-------------|------------|-----------|----------|
| Abemaciclib + ET | 2555 (0) | 2387 (127) | 2322 (150) | 2256 (171) | 2189 (188) | 2129 (204) | 2023 (265) | 1162 (1095) | 520 (1726) | 79 (2160) | 0 (2238) |
| ET Alone         | 2565 (0) | 2404 (109) | 2327 (125) | 2236 (147) | 2143 (167) | 2059 (179) | 1920 (260) | 1134 (999)  | 511 (1596) | 82 (2010) | 0 (2091) |

b. Distant relapse-free survival (DRFS)

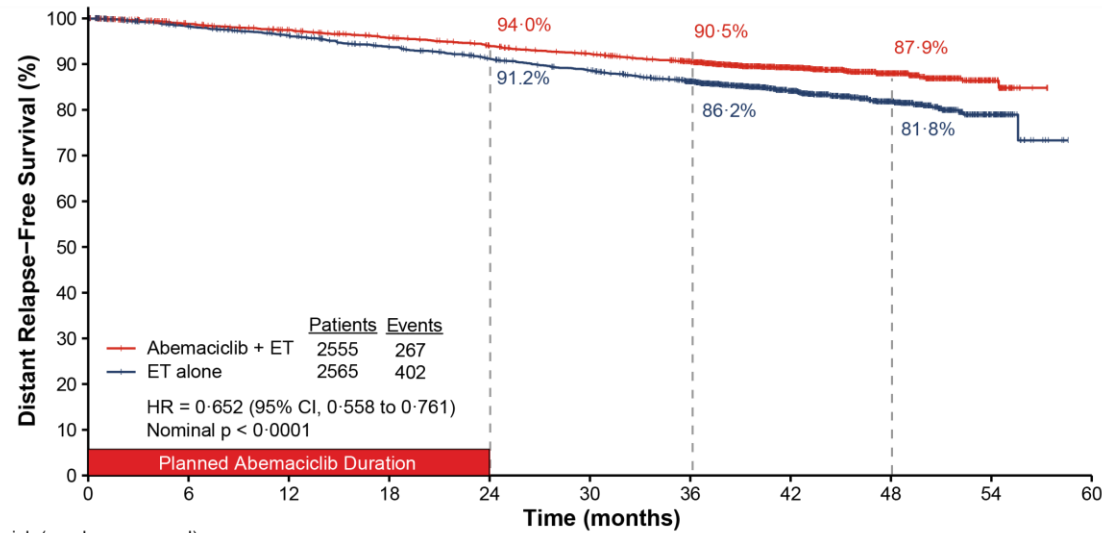

Number at risk (number censored)

|                  | 0        | 6          | 12         | 18         | 24         | 30         | 36         | 42          | 48         | 54        | 60       |
|------------------|----------|------------|------------|------------|------------|------------|------------|-------------|------------|-----------|----------|
| Abemaciclib + ET | 2555 (0) | 2396 (130) | 2340 (155) | 2275 (177) | 2214 (197) | 2156 (214) | 2051 (279) | 1183 (1122) | 534 (1763) | 81 (2208) | 0 (2288) |
| ET Alone         | 2565 (0) | 2411 (111) | 2344 (130) | 2259 (154) | 2177 (174) | 2102 (188) | 1964 (273) | 1162 (1034) | 525 (1651) | 85 (2079) | 0 (2163) |

c. Overall survival (OS)

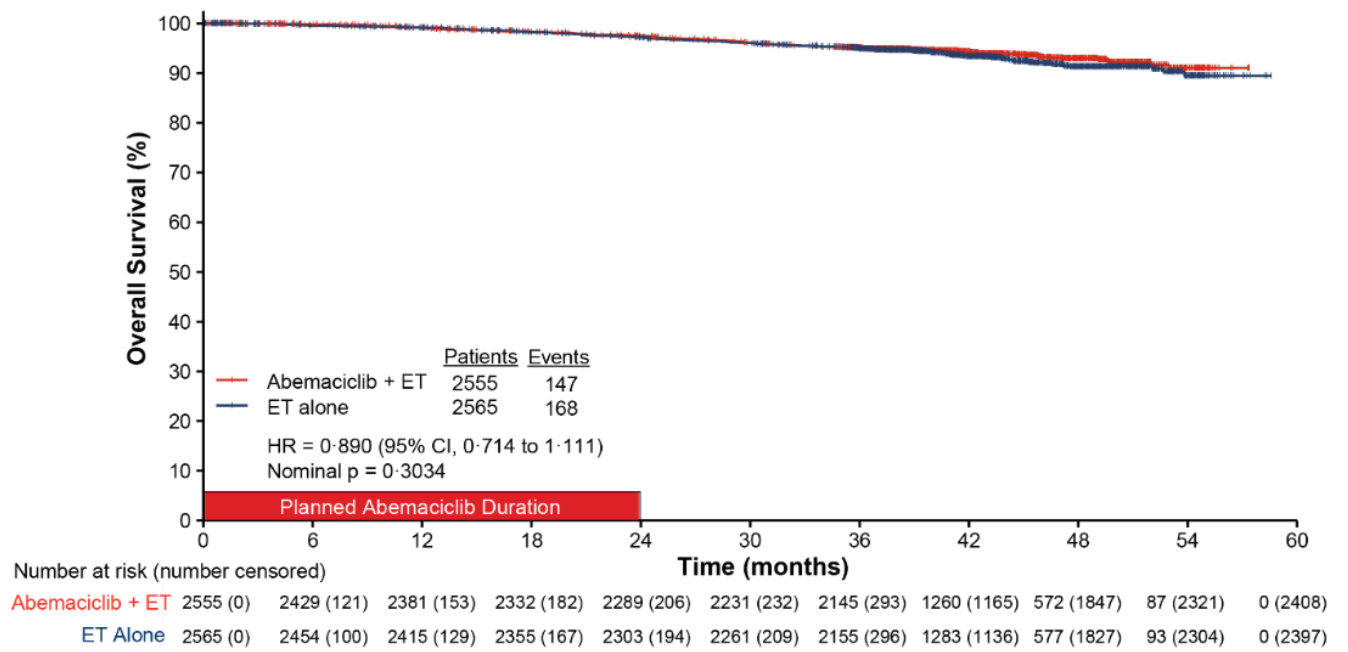

Figure A4. Kaplan-Meier curves for Cohort 1 Ki-67 High population at OS IA2.

a. Invasive disease-free survival (IDFS)

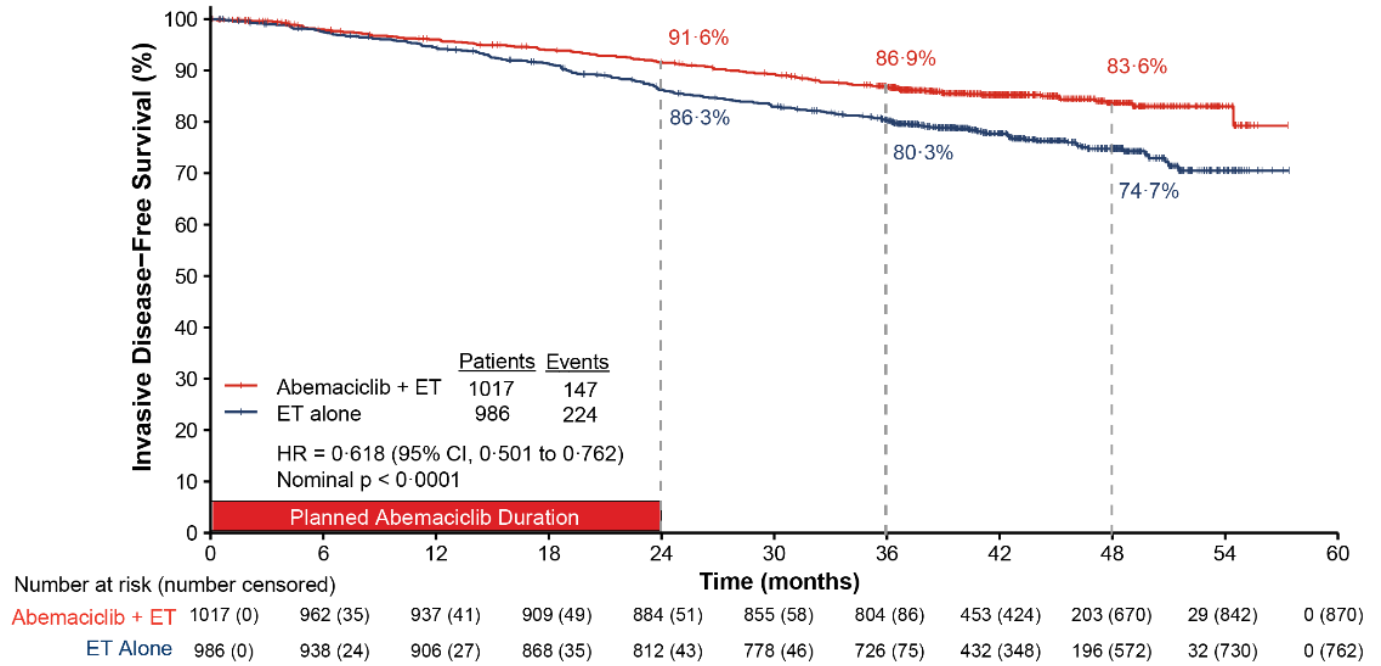

b. Distant relapse-free survival (DRFS)

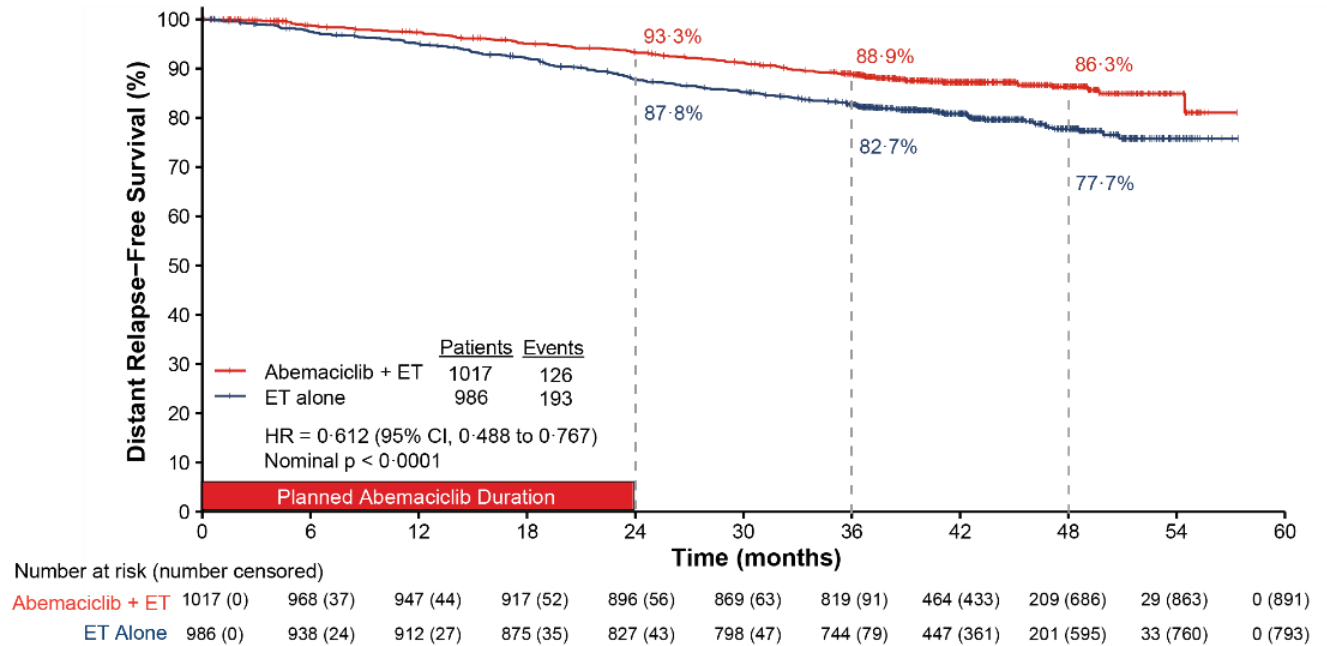

**c. Overall survival (OS)**

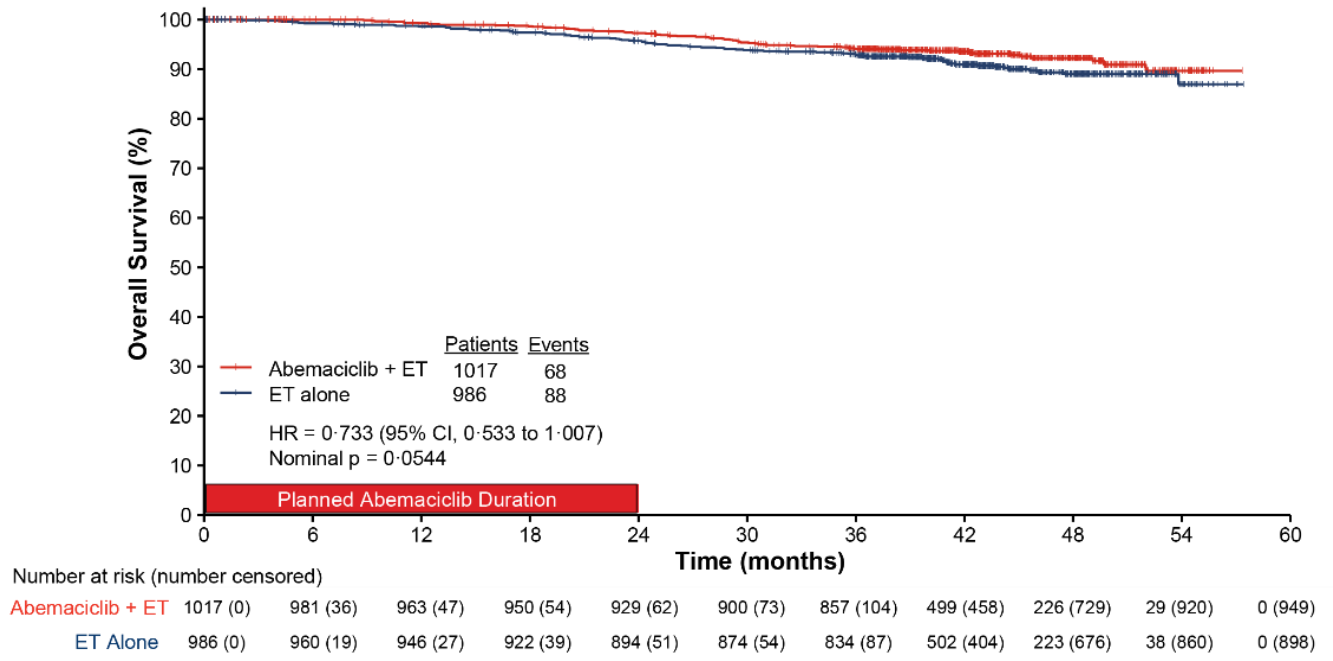



Figure A5. Kaplan-Meier curves for Cohort 1 Ki-67 Low population at OS IA2.

a. Invasive disease-free survival (IDFS)

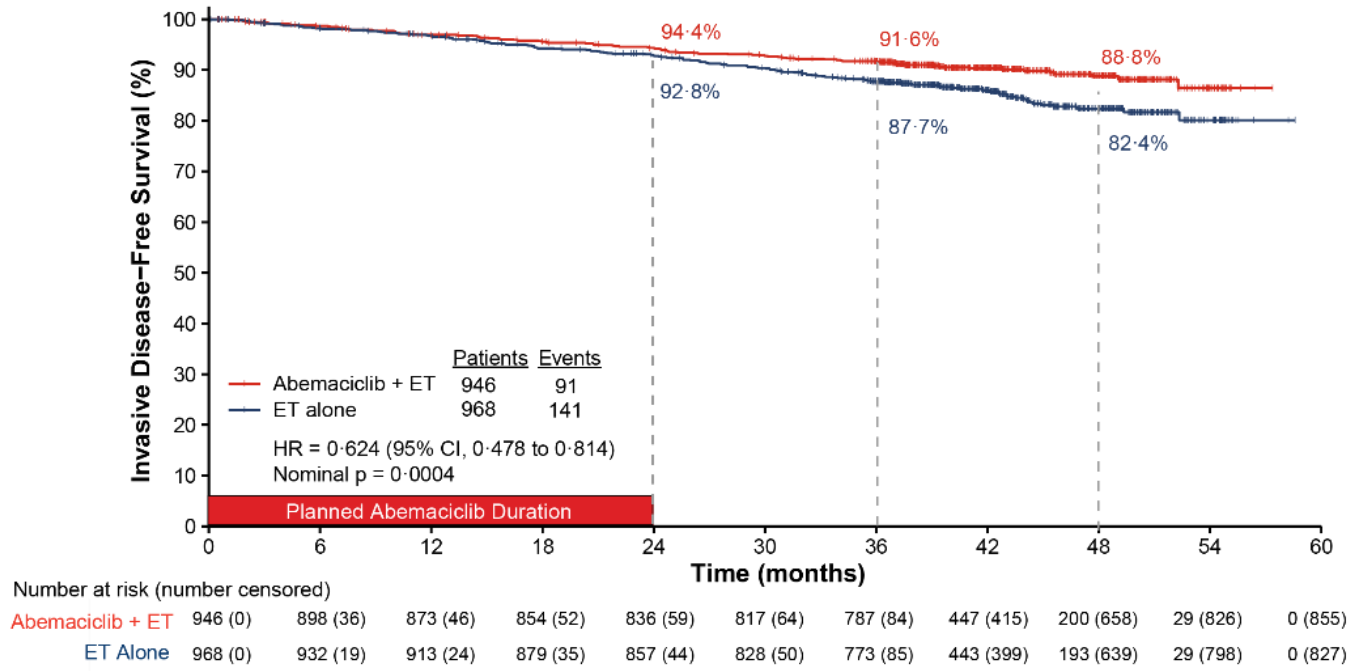

b. Distant relapse-free survival (DRFS)

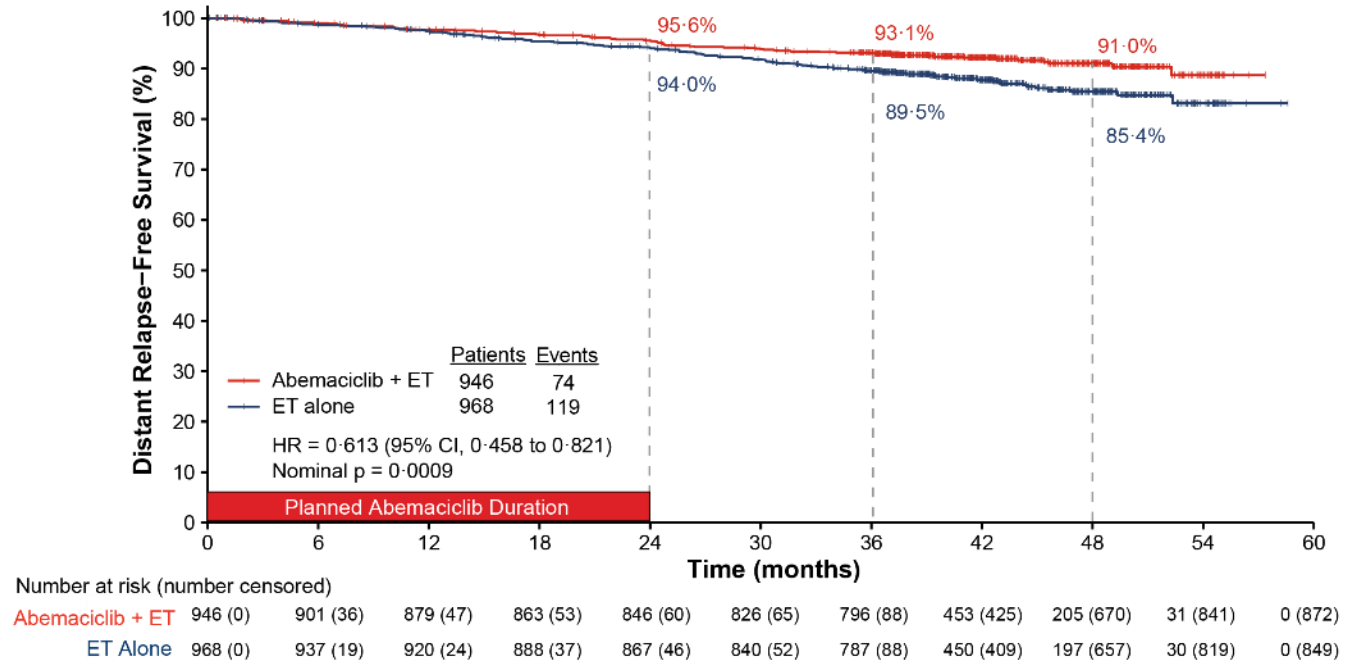

c. Overall survival (OS)

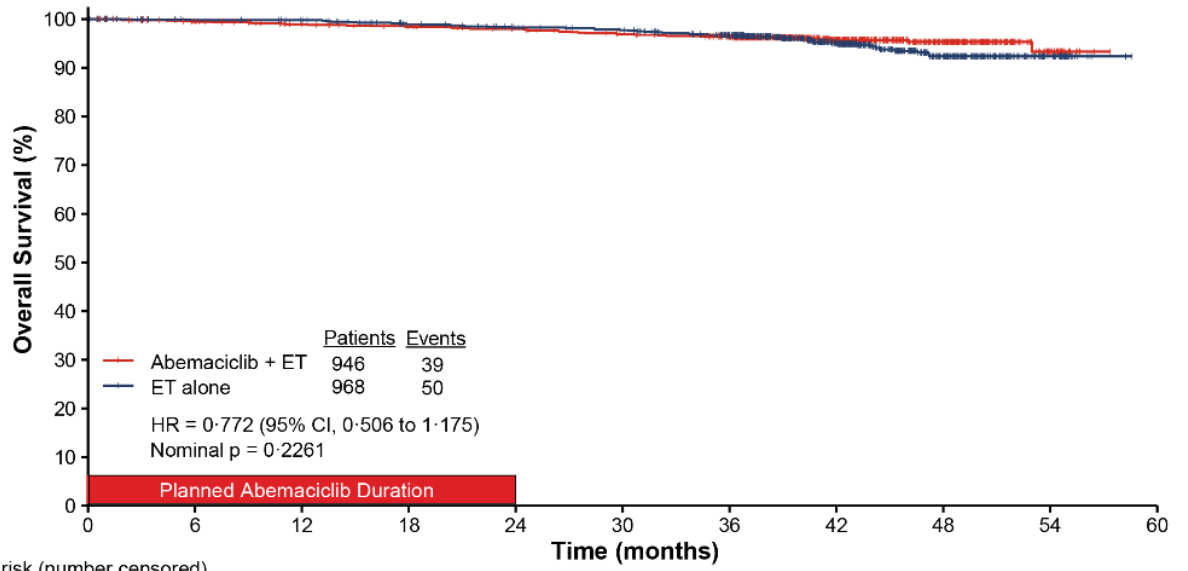

Number at risk (number censored)

|                  | 0       | 6        | 12       | 18       | 24       | 30       | 36       | 42        | 48        | 54       | 60      |
|------------------|---------|----------|----------|----------|----------|----------|----------|-----------|-----------|----------|---------|
| Abemaciclib + ET | 946 (0) | 909 (32) | 892 (45) | 880 (52) | 868 (60) | 852 (66) | 827 (86) | 476 (433) | 218 (691) | 34 (873) | 0 (907) |
| ET Alone         | 968 (0) | 947 (19) | 941 (25) | 917 (41) | 901 (51) | 890 (57) | 845 (96) | 489 (438) | 219 (703) | 33 (885) | 0 (918) |

**Figure A6. Distant relapse-free survival (DRFS) by Survival Status.** Abbreviations: AFU 1=additional follow-up one; DRFS=distant relapse-free survival; IDFS=invasive disease-free survival; OS IA2=second overall survival interim analysis; PO=primary outcome

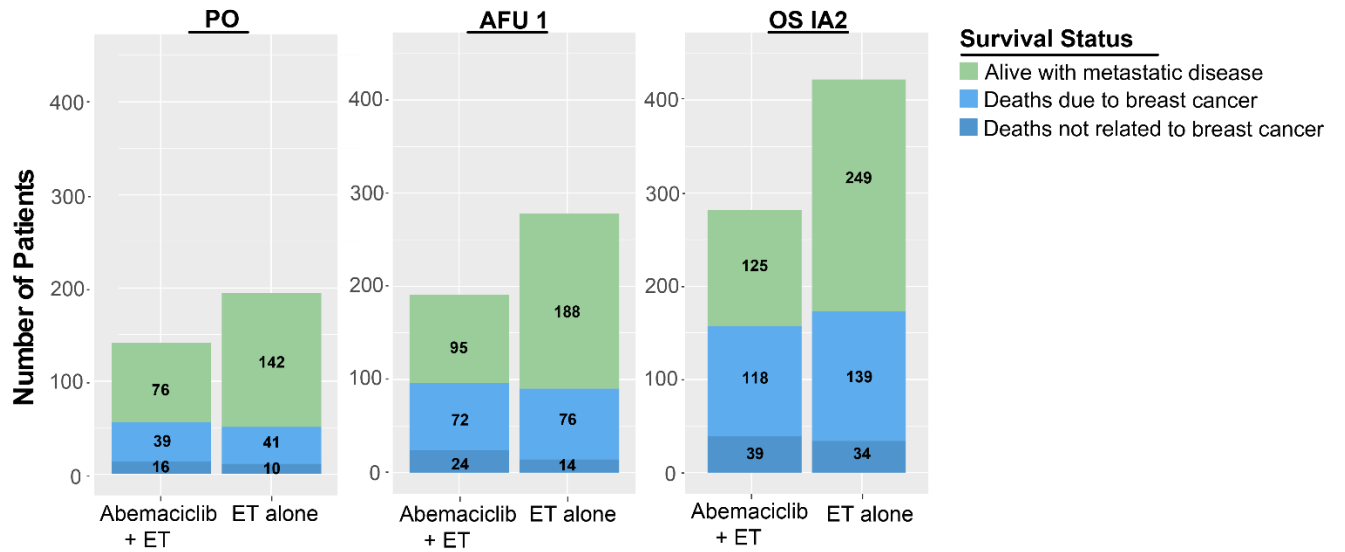

\*For patients who had distant metastatic disease or died.

†Deaths for reasons other than breast cancer were captured as due to AE and included deaths due to second primaries and unknown cause

Tables

**Table A1. Breakdown of Invasive disease-free survival (IDFS) Events**

| Summary of IDFS events<br>ITT population | Abemaciclib + ET<br>N=2808 | ET alone<br>N=2829 |
|------------------------------------------|----------------------------|--------------------|
| Number of IDFS events, n (%)             | 336 (12.0)                 | 499 (17.6)         |
| Death without invasive disease           | 30 (1.1)                   | 20 (0.7)           |
| Invasive disease recurrence              | 306 (10.9)                 | 479 (16.9)         |
| Local/regional recurrence                | 48 (1.7)                   | 76 (2.7)           |
| Distant recurrence                       | 225 (8.0)                  | 364 (12.9)         |
| Contralateral recurrence                 | 9 (0.3)                    | 14 (0.5)           |
| Second primary neoplasm                  | 29 (1.0)                   | 38 (1.3)           |

Note: Tumour locations at the first occurrence were summarised in this table.

**Table A2. Benefit over Time: Piecewise Analysis for Invasive disease-free survival (IDFS) and Distant relapse-free survival (DRFS)**

| Analysis landmark | IDFS             |     |                                                     | DRFS             |     |                                                     |
|-------------------|------------------|-----|-----------------------------------------------------|------------------|-----|-----------------------------------------------------|
|                   | Events (n)       |     | Piecewise HR <sup>a</sup><br>(95% CI <sup>b</sup> ) | Events (n)       |     | Piecewise HR <sup>a</sup><br>(95% CI <sup>b</sup> ) |
|                   | Abemaciclib + ET | ET  |                                                     | Abemaciclib + ET | ET  |                                                     |
| Year 0-1          | 93               | 116 | 0.782 (0.583, 1.018)                                | 69               | 93  | 0.725 (0.519, 0.983)                                |
| Year 1-2          | 100              | 154 | 0.674 (0.521, 0.858)                                | 88               | 133 | 0.691 (0.521, 0.887)                                |
| Year 2-3          | 90               | 143 | 0.618 (0.477, 0.788)                                | 82               | 124 | 0.651 (0.497, 0.851)                                |
| Year 3+           | 53               | 86  | 0.602 (0.428, 0.803)                                | 42               | 71  | 0.581 (0.391, 0.818)                                |

<sup>a</sup> Piecewise hazard ratio was estimated using piecewise exponential model to assess the yearly treatment effect size

<sup>b</sup> 95% credible intervals were calculated by equal tails in the posterior samples of Bayesian exponential models

Abbreviations: CI=confidence interval; HR=hazard ratio; ET=endocrine therapy; n=number of events

**Table A3. Summary of Efficacy Results in Subpopulations**

| Number of patients, N        | Cohort 1                    |                      | C1-Ki67H                   |                      | C1-Ki67L                  |                      |
|------------------------------|-----------------------------|----------------------|----------------------------|----------------------|---------------------------|----------------------|
|                              | Abemaciclib + ET<br>N=2555* | ET alone<br>N=2565*  | Abemaciclib + ET<br>N=1017 | ET alone<br>N=986    | Abemaciclib + ET<br>N=946 | ET alone<br>N=968    |
| <b>IDFS</b>                  |                             |                      |                            |                      |                           |                      |
| Number of events             | 317                         | 474                  | 147                        | 224                  | 91                        | 141                  |
| HR <sup>a</sup> (95% CI)     | 0.653 (0.567, 0.753)        |                      | 0.618 (0.501, 0.762)       |                      | 0.624 (0.478, 0.814)      |                      |
| Nominal p-value              | p<0.0001                    |                      | p<0.0001                   |                      | p=0.0004                  |                      |
| <b>IDFS rate, % (95% CI)</b> |                             |                      |                            |                      |                           |                      |
| 3 years                      | 88.8<br>(87.5, 90.0)        | 83.8<br>(82.3, 85.2) | 86.9<br>(84.6, 88.9)       | 80.3<br>(77.6, 82.7) | 91.6<br>(89.6, 93.3)      | 87.7<br>(85.4, 89.7) |
| 4 years                      | 85.5<br>(83.8, 87.0)        | 78.6<br>(76.7, 80.4) | 83.6<br>(80.8, 86.1)       | 74.7<br>(71.5, 77.7) | 88.8<br>(86.1, 90.9)      | 82.4<br>(79.2, 85.1) |
| <b>DRFS</b>                  |                             |                      |                            |                      |                           |                      |
| Number of events             | 267                         | 402                  | 126                        | 193                  | 74                        | 119                  |
| HR <sup>a</sup> (95% CI)     | 0.652 (0.558, 0.761)        |                      | 0.612 (0.488, 0.767)       |                      | 0.613 (0.458, 0.821)      |                      |
| Nominal p-value              | p<0.0001                    |                      | p<0.0001                   |                      | p=0.0009                  |                      |

| <b>DRFS rate, % (95% CI)</b> |                      |                      |                      |                      |                      |                      |
|------------------------------|----------------------|----------------------|----------------------|----------------------|----------------------|----------------------|
| 3 years                      | 90.5<br>(89.3, 91.6) | 86.2<br>(84.7, 87.5) | 88.9<br>(86.7, 90.7) | 82.7<br>(80.1, 85.0) | 93.1<br>(91.2, 94.6) | 89.5<br>(87.4, 91.3) |
| 4 years                      | 87.9<br>(86.4, 89.3) | 81.8<br>(79.9, 83.4) | 86.3<br>(83.7, 88.5) | 77.7<br>(74.5, 80.6) | 91.0<br>(88.7, 92.9) | 85.4<br>(82.6, 87.9) |
| <b>Overall survival (OS)</b> |                      |                      |                      |                      |                      |                      |
| Number of events             | 147                  | 168                  | 68                   | 88                   | 39                   | 50                   |
| HR <sup>a</sup> (95% CI)     | 0.890 (0.714, 1.111) |                      | 0.733 (0.533, 1.007) |                      | 0.772 (0.506, 1.175) |                      |

<sup>a</sup> Stratified by geographic region, prior chemotherapy, and menopausal status as recorded in IWRS

\*Cohort 1 patients with missing Ki-67 value: Abemacicib plus ET n=592; ET alone n=611.

Abbreviations: CI=confidence interval; DRFS=distance relapse-free survival; ET=endocrine therapy; HR=hazard ratio; IDFS=invasive disease-free survival;

N=number of patients in population; OS=overall survival

**Table A4. Treatment emergent adverse events (TEAEs) in safety population at OS IA2 regardless of attribution with grade 1-2 incidence of  $\geq 10\%$  or at least one occurrence of grade 3, 4, or 5**

| Preferred Term                                | Abemaciclib+ ET<br>N=2791, n (%) |             |          |          | ET alone<br>N=2800, n (%) |            |          |          |
|-----------------------------------------------|----------------------------------|-------------|----------|----------|---------------------------|------------|----------|----------|
|                                               | Grade 1/2                        | Grade 3     | Grade 4  | Grade 5  | Grade 1/2                 | Grade 3    | Grade 4  | Grade 5  |
| <b>Subjects with <math>\geq 1</math> TEAE</b> | 1353 (48.5)                      | 1289 (46.2) | 88 (3.2) | 16 (0.6) | 2016 (72.0)               | 439 (15.7) | 22 (0.8) | 11 (0.4) |
| Diarrhoea                                     | 2114 (75.7)                      | 218 (7.8)   | 0 (0.0)  | 1 (0.0)  | 238 (8.5)                 | 6 (0.2)    | 0 (0.0)  | 0 (0.0)  |
| Fatigue                                       | 1060 (38.0)                      | 80 (2.9)    | 0 (0.0)  | 0 (0.0)  | 501 (17.9)                | 4 (0.1)    | 0 (0.0)  | 0 (0.0)  |
| Abdominal pain                                | 957 (34.3)                       | 39 (1.4)    | 0 (0.0)  | 0 (0.0)  | 269 (9.6)                 | 9 (0.3)    | 0 (0.0)  | 0 (0.0)  |
| Nausea                                        | 811 (29.1)                       | 14 (0.5)    | 0 (0.0)  | 0 (0.0)  | 251 (9.0)                 | 2 (0.1)    | 0 (0.0)  | 0 (0.0)  |
| Leukopenia                                    | 734 (26.3)                       | 314 (11.3)  | 4 (0.1)  | 0 (0.0)  | 175 (6.3)                 | 11 (0.4)   | 0 (0.0)  | 0 (0.0)  |
| Neutropenia                                   | 733 (26.3)                       | 529 (19.0)  | 19 (0.7) | 0 (0.0)  | 134 (4.8)                 | 20 (0.7)   | 4 (0.1)  | 0 (0.0)  |
| Arthralgia                                    | 731 (26.2)                       | 9 (0.3)     | 0 (0.0)  | 0 (0.0)  | 1031 (36.8)               | 29 (1.0)   | 0 (0.0)  | 0 (0.0)  |
| Anaemia                                       | 626 (22.4)                       | 57 (2.0)    | 1 (0.0)  | 0 (0.0)  | 96 (3.4)                  | 11 (0.4)   | 1 (0.0)  | 0 (0.0)  |
| Headache                                      | 545 (19.5)                       | 8 (0.3)     | 0 (0.0)  | 0 (0.0)  | 420 (15.0)                | 5 (0.2)    | 0 (0.0)  | 0 (0.0)  |
| Vomiting                                      | 476 (17.1)                       | 15 (0.5)    | 0 (0.0)  | 0 (0.0)  | 127 (4.5)                 | 4 (0.1)    | 0 (0.0)  | 0 (0.0)  |
| Hot flush                                     | 427 (15.3)                       | 4 (0.1)     | 0 (0.0)  | 0 (0.0)  | 634 (22.6)                | 10 (0.4)   | 0 (0.0)  | 0 (0.0)  |
| Cough                                         | 390 (14.0)                       | 1 (0.0)     | 0 (0.0)  | 0 (0.0)  | 223 (8.0)                 | 0 (0.0)    | 0 (0.0)  | 0 (0.0)  |
| Lymphoedema                                   | 346 (12.4)                       | 5 (0.2)     | 0 (0.0)  | 0 (0.0)  | 254 (9.1)                 | 1 (0.0)    | 0 (0.0)  | 0 (0.0)  |
| Thrombocytopenia                              | 337 (12.1)                       | 28 (1.0)    | 8 (0.3)  | 0 (0.0)  | 48 (1.7)                  | 2 (0.1)    | 2 (0.1)  | 0 (0.0)  |
| Constipation                                  | 334 (12.0)                       | 2 (0.1)     | 0 (0.0)  | 0 (0.0)  | 170 (6.1)                 | 1 (0.0)    | 0 (0.0)  | 0 (0.0)  |
| Urinary tract infection                       | 321 (11.5)                       | 16 (0.6)    | 0 (0.0)  | 0 (0.0)  | 204 (7.3)                 | 6 (0.2)    | 0 (0.0)  | 0 (0.0)  |
| Alopecia                                      | 318 (11.4)                       | 0 (0.0)     | 0 (0.0)  | 0 (0.0)  | 77 (2.8)                  | 0 (0.0)    | 0 (0.0)  | 0 (0.0)  |
| Decreased appetite                            | 315 (11.3)                       | 16 (0.6)    | 0 (0.0)  | 0 (0.0)  | 68 (2.4)                  | 2 (0.1)    | 0 (0.0)  | 0 (0.0)  |
| Blood creatinine increased                    | 308 (11.0)                       | 3 (0.1)     | 0 (0.0)  | 0 (0.0)  | 28 (1.0)                  | 0 (0.0)    | 0 (0.0)  | 0 (0.0)  |
| Rash                                          | 305 (10.9)                       | 11 (0.4)    | 0 (0.0)  | 0 (0.0)  | 128 (4.6)                 | 0 (0.0)    | 0 (0.0)  | 0 (0.0)  |
| Dizziness                                     | 301 (10.8)                       | 4 (0.1)     | 0 (0.0)  | 0 (0.0)  | 190 (6.8)                 | 1 (0.0)    | 0 (0.0)  | 0 (0.0)  |
| Upper respiratory tract infection             | 296 (10.6)                       | 6 (0.2)     | 0 (0.0)  | 0 (0.0)  | 238 (8.5)                 | 0 (0.0)    | 0 (0.0)  | 0 (0.0)  |
| Pain in extremity                             | 284 (10.2)                       | 3 (0.1)     | 0 (0.0)  | 0 (0.0)  | 323 (11.5)                | 4 (0.1)    | 0 (0.0)  | 0 (0.0)  |
| Aspartate aminotransferase increased          | 283 (10.1)                       | 50 (1.8)    | 3 (0.1)  | 0 (0.0)  | 125 (4.5)                 | 15 (0.5)   | 0 (0.0)  | 0 (0.0)  |
| Pyrexia                                       | 279 (10.0)                       | 2 (0.1)     | 0 (0.0)  | 0 (0.0)  | 130 (4.6)                 | 0 (0.0)    | 0 (0.0)  | 0 (0.0)  |
| Back pain                                     | 277 (9.9)                        | 9 (0.3)     | 0 (0.0)  | 0 (0.0)  | 342 (12.2)                | 9 (0.3)    | 0 (0.0)  | 0 (0.0)  |
| Alanine aminotransferase increased            | 274 (9.8)                        | 72 (2.6)    | 5 (0.2)  | 0 (0.0)  | 138 (4.9)                 | 19 (0.7)   | 0 (0.0)  | 0 (0.0)  |

|                                      |           |           |         |         |           |          |         |         |
|--------------------------------------|-----------|-----------|---------|---------|-----------|----------|---------|---------|
| Insomnia                             | 257 (9.2) | 1 (0.0)   | 0 (0.0) | 0 (0.0) | 268 (9.6) | 0 (0.0)  | 0 (0.0) | 0 (0.0) |
| Lymphopenia                          | 246 (8.8) | 148 (5.3) | 3 (0.1) | 0 (0.0) | 82 (2.9)  | 14 (0.5) | 0 (0.0) | 0 (0.0) |
| Pruritus                             | 243 (8.7) | 2 (0.1)   | 0 (0.0) | 0 (0.0) | 123 (4.4) | 1 (0.0)  | 0 (0.0) | 0 (0.0) |
| Neuropathy                           | 234 (8.4) | 4 (0.1)   | 0 (0.0) | 0 (0.0) | 239 (8.5) | 4 (0.1)  | 0 (0.0) | 0 (0.0) |
| Oedema peripheral                    | 210 (7.5) | 3 (0.1)   | 0 (0.0) | 0 (0.0) | 131 (4.7) | 0 (0.0)  | 0 (0.0) | 0 (0.0) |
| Myalgia                              | 199 (7.1) | 1 (0.0)   | 0 (0.0) | 0 (0.0) | 195 (7.0) | 0 (0.0)  | 0 (0.0) | 0 (0.0) |
| Dyspnoea                             | 168 (6.0) | 9 (0.3)   | 0 (0.0) | 0 (0.0) | 94 (3.4)  | 4 (0.1)  | 1 (0.0) | 0 (0.0) |
| Stomatitis                           | 168 (6.0) | 3 (0.1)   | 0 (0.0) | 0 (0.0) | 34 (1.2)  | 0 (0.0)  | 0 (0.0) | 0 (0.0) |
| Influenza like illness               | 158 (5.7) | 1 (0.0)   | 0 (0.0) | 0 (0.0) | 125 (4.5) | 1 (0.0)  | 0 (0.0) | 0 (0.0) |
| Lacrimation increased                | 152 (5.4) | 2 (0.1)   | 0 (0.0) | 0 (0.0) | 10 (0.4)  | 0 (0.0)  | 0 (0.0) | 0 (0.0) |
| Depression                           | 146 (5.2) | 4 (0.1)   | 0 (0.0) | 0 (0.0) | 129 (4.6) | 5 (0.2)  | 2 (0.1) | 0 (0.0) |
| Breast pain                          | 120 (4.3) | 1 (0.0)   | 0 (0.0) | 0 (0.0) | 145 (5.2) | 2 (0.1)  | 0 (0.0) | 0 (0.0) |
| Influenza                            | 117 (4.2) | 4 (0.1)   | 0 (0.0) | 0 (0.0) | 110 (3.9) | 3 (0.1)  | 0 (0.0) | 1 (0.0) |
| Blood alkaline phosphatase increased | 112 (4.0) | 6 (0.2)   | 0 (0.0) | 0 (0.0) | 70 (2.5)  | 1 (0.0)  | 0 (0.0) | 0 (0.0) |
| Vulvovaginal dryness*b               | 108 (3.9) | 3 (0.1)   | 0 (0.0) | 0 (0.0) | 140 (5.0) | 6 (0.2)  | 0 (0.0) | 0 (0.0) |
| Hypertension                         | 106 (3.8) | 30 (1.1)  | 0 (0.0) | 0 (0.0) | 122 (4.4) | 49 (1.8) | 0 (0.0) | 0 (0.0) |
| Anxiety                              | 102 (3.7) | 2 (0.1)   | 0 (0.0) | 0 (0.0) | 137 (4.9) | 3 (0.1)  | 0 (0.0) | 0 (0.0) |
| Weight decreased                     | 92 (3.3)  | 8 (0.3)   | 0 (0.0) | 0 (0.0) | 37 (1.3)  | 3 (0.1)  | 0 (0.0) | 0 (0.0) |
| Musculoskeletal chest pain           | 91 (3.3)  | 1 (0.0)   | 0 (0.0) | 0 (0.0) | 90 (3.2)  | 1 (0.0)  | 0 (0.0) | 0 (0.0) |
| Hypokalaemia                         | 90 (3.2)  | 28 (1.0)  | 4 (0.1) | 0 (0.0) | 25 (0.9)  | 5 (0.2)  | 2 (0.1) | 0 (0.0) |
| Procedural pain                      | 86 (3.1)  | 2 (0.1)   | 0 (0.0) | 0 (0.0) | 70 (2.5)  | 0 (0.0)  | 0 (0.0) | 0 (0.0) |
| Malaise                              | 85 (3.0)  | 3 (0.1)   | 0 (0.0) | 0 (0.0) | 32 (1.1)  | 1 (0.0)  | 0 (0.0) | 0 (0.0) |
| Mucosal inflammation                 | 83 (3.0)  | 1 (0.0)   | 0 (0.0) | 0 (0.0) | 22 (0.8)  | 0 (0.0)  | 0 (0.0) | 0 (0.0) |
| Vertigo                              | 83 (3.0)  | 1 (0.0)   | 0 (0.0) | 0 (0.0) | 57 (2.0)  | 1 (0.0)  | 0 (0.0) | 0 (0.0) |
| Haemorrhoids                         | 82 (2.9)  | 2 (0.1)   | 0 (0.0) | 0 (0.0) | 31 (1.1)  | 1 (0.0)  | 0 (0.0) | 0 (0.0) |
| Sinusitis                            | 80 (2.9)  | 1 (0.0)   | 0 (0.0) | 0 (0.0) | 59 (2.1)  | 0 (0.0)  | 0 (0.0) | 0 (0.0) |
| Bone pain                            | 78 (2.8)  | 1 (0.0)   | 0 (0.0) | 0 (0.0) | 99 (3.5)  | 4 (0.1)  | 0 (0.0) | 0 (0.0) |
| Gastroenteritis                      | 78 (2.8)  | 4 (0.1)   | 0 (0.0) | 0 (0.0) | 36 (1.3)  | 0 (0.0)  | 0 (0.0) | 0 (0.0) |
| Gastritis                            | 70 (2.5)  | 1 (0.0)   | 0 (0.0) | 0 (0.0) | 37 (1.3)  | 1 (0.0)  | 0 (0.0) | 0 (0.0) |
| Pain                                 | 69 (2.5)  | 1 (0.0)   | 0 (0.0) | 0 (0.0) | 67 (2.4)  | 1 (0.0)  | 0 (0.0) | 0 (0.0) |
| Fall                                 | 68 (2.4)  | 4 (0.1)   | 0 (0.0) | 0 (0.0) | 45 (1.6)  | 3 (0.1)  | 0 (0.0) | 0 (0.0) |
| Hypercholesterolaemia                | 66 (2.4)  | 1 (0.0)   | 0 (0.0) | 0 (0.0) | 88 (3.1)  | 0 (0.0)  | 0 (0.0) | 0 (0.0) |

|                                     |          |          |          |         |          |          |         |         |
|-------------------------------------|----------|----------|----------|---------|----------|----------|---------|---------|
| Hypertriglyceridaemia               | 62 (2.2) | 11 (0.4) | 13 (0.5) | 0 (0.0) | 56 (2.0) | 4 (0.1)  | 1 (0.0) | 0 (0.0) |
| Gamma-glutamyltransferase increased | 61 (2.2) | 34 (1.2) | 5 (0.2)  | 0 (0.0) | 26 (0.9) | 5 (0.2)  | 1 (0.0) | 0 (0.0) |
| Chest pain                          | 54 (1.9) | 4 (0.1)  | 0 (0.0)  | 0 (0.0) | 56 (2.0) | 1 (0.0)  | 0 (0.0) | 0 (0.0) |
| Hepatic steatosis                   | 53 (1.9) | 1 (0.0)  | 0 (0.0)  | 0 (0.0) | 40 (1.4) | 1 (0.0)  | 0 (0.0) | 0 (0.0) |
| COVID-19                            | 52 (1.9) | 4 (0.1)  | 0 (0.0)  | 0 (0.0) | 23 (0.8) | 1 (0.0)  | 0 (0.0) | 0 (0.0) |
| Cellulitis                          | 51 (1.8) | 14 (0.5) | 0 (0.0)  | 0 (0.0) | 31 (1.1) | 8 (0.3)  | 0 (0.0) | 0 (0.0) |
| Hyperglycaemia                      | 50 (1.8) | 5 (0.2)  | 0 (0.0)  | 0 (0.0) | 48 (1.7) | 9 (0.3)  | 0 (0.0) | 0 (0.0) |
| Osteopenia                          | 50 (1.8) | 1 (0.0)  | 0 (0.0)  | 0 (0.0) | 52 (1.9) | 0 (0.0)  | 0 (0.0) | 0 (0.0) |
| Pneumonia                           | 49 (1.8) | 18 (0.6) | 3 (0.1)  | 1 (0.0) | 24 (0.9) | 17 (0.6) | 0 (0.0) | 1 (0.0) |
| Weight increased                    | 49 (1.8) | 3 (0.1)  | 0 (0.0)  | 0 (0.0) | 65 (2.3) | 5 (0.2)  | 0 (0.0) | 0 (0.0) |
| Pneumonitis                         | 43 (1.5) | 6 (0.2)  | 0 (0.0)  | 1 (0.0) | 10 (0.4) | 0 (0.0)  | 0 (0.0) | 0 (0.0) |
| Hyperuricaemia                      | 41 (1.5) | 2 (0.1)  | 2 (0.1)  | 0 (0.0) | 20 (0.7) | 0 (0.0)  | 0 (0.0) | 0 (0.0) |
| Musculoskeletal pain                | 41 (1.5) | 2 (0.1)  | 0 (0.0)  | 0 (0.0) | 66 (2.4) | 1 (0.0)  | 0 (0.0) | 0 (0.0) |
| Hypotension                         | 39 (1.4) | 1 (0.0)  | 0 (0.0)  | 0 (0.0) | 15 (0.5) | 1 (0.0)  | 0 (0.0) | 0 (0.0) |
| Oedema                              | 37 (1.3) | 1 (0.0)  | 0 (0.0)  | 0 (0.0) | 14 (0.5) | 0 (0.0)  | 0 (0.0) | 0 (0.0) |
| Skin infection                      | 37 (1.3) | 3 (0.1)  | 0 (0.0)  | 0 (0.0) | 33 (1.2) | 0 (0.0)  | 0 (0.0) | 0 (0.0) |
| Dermatitis                          | 35 (1.3) | 1 (0.0)  | 0 (0.0)  | 0 (0.0) | 15 (0.5) | 0 (0.0)  | 0 (0.0) | 0 (0.0) |
| Hypoalbuminaemia                    | 33 (1.2) | 2 (0.1)  | 0 (0.0)  | 0 (0.0) | 18 (0.6) | 0 (0.0)  | 0 (0.0) | 0 (0.0) |
| Eczema                              | 32 (1.1) | 1 (0.0)  | 0 (0.0)  | 0 (0.0) | 38 (1.4) | 0 (0.0)  | 0 (0.0) | 0 (0.0) |
| Muscular weakness                   | 32 (1.1) | 1 (0.0)  | 0 (0.0)  | 0 (0.0) | 20 (0.7) | 1 (0.0)  | 0 (0.0) | 0 (0.0) |
| Viral infection                     | 32 (1.1) | 3 (0.1)  | 0 (0.0)  | 0 (0.0) | 15 (0.5) | 0 (0.0)  | 0 (0.0) | 0 (0.0) |
| Dehydration                         | 31 (1.1) | 10 (0.4) | 0 (0.0)  | 0 (0.0) | 8 (0.3)  | 0 (0.0)  | 0 (0.0) | 0 (0.0) |
| Non-cardiac chest pain              | 31 (1.1) | 1 (0.0)  | 0 (0.0)  | 0 (0.0) | 21 (0.8) | 1 (0.0)  | 0 (0.0) | 0 (0.0) |
| Hyperhidrosis                       | 30 (1.1) | 2 (0.1)  | 0 (0.0)  | 0 (0.0) | 38 (1.4) | 0 (0.0)  | 0 (0.0) | 0 (0.0) |
| Seroma                              | 28 (1.0) | 1 (0.0)  | 0 (0.0)  | 0 (0.0) | 15 (0.5) | 1 (0.0)  | 0 (0.0) | 0 (0.0) |
| Urticaria                           | 28 (1.0) | 1 (0.0)  | 0 (0.0)  | 0 (0.0) | 20 (0.7) | 0 (0.0)  | 0 (0.0) | 0 (0.0) |
| Blood bilirubin increased           | 27 (1.0) | 6 (0.2)  | 2 (0.1)  | 0 (0.0) | 27 (1.0) | 0 (0.0)  | 0 (0.0) | 0 (0.0) |
| Deep vein thrombosis                | 26 (0.9) | 9 (0.3)  | 1 (0.0)  | 0 (0.0) | 5 (0.2)  | 2 (0.1)  | 0 (0.0) | 0 (0.0) |
| Cataract                            | 25 (0.9) | 10 (0.4) | 0 (0.0)  | 0 (0.0) | 11 (0.4) | 5 (0.2)  | 0 (0.0) | 0 (0.0) |
| Respiratory tract infection         | 25 (0.9) | 1 (0.0)  | 0 (0.0)  | 0 (0.0) | 23 (0.8) | 1 (0.0)  | 0 (0.0) | 0 (0.0) |
| Dyspareunia                         | 24 (0.9) | 1 (0.0)  | 0 (0.0)  | 0 (0.0) | 20 (0.7) | 1 (0.0)  | 0 (0.0) | 0 (0.0) |
| Hypocalcaemia                       | 24 (0.9) | 2 (0.1)  | 0 (0.0)  | 0 (0.0) | 14 (0.5) | 2 (0.1)  | 0 (0.0) | 0 (0.0) |



|                                        |          |          |         |         |          |          |         |         |
|----------------------------------------|----------|----------|---------|---------|----------|----------|---------|---------|
| Hyponatraemia                          | 24 (0.9) | 14 (0.5) | 0 (0.0) | 0 (0.0) | 13 (0.5) | 4 (0.1)  | 1 (0.0) | 0 (0.0) |
| Hyperkalaemia                          | 23 (0.8) | 5 (0.2)  | 1 (0.0) | 0 (0.0) | 13 (0.5) | 4 (0.1)  | 0 (0.0) | 0 (0.0) |
| Radiation pneumonitis                  | 23 (0.8) | 2 (0.1)  | 0 (0.0) | 0 (0.0) | 14 (0.5) | 1 (0.0)  | 0 (0.0) | 0 (0.0) |
| Mastitis                               | 22 (0.8) | 7 (0.3)  | 0 (0.0) | 0 (0.0) | 32 (1.1) | 9 (0.3)  | 0 (0.0) | 0 (0.0) |
| Breast reconstruction                  | 21 (0.8) | 8 (0.3)  | 0 (0.0) | 0 (0.0) | 18 (0.6) | 6 (0.2)  | 0 (0.0) | 0 (0.0) |
| Flank pain                             | 20 (0.7) | 2 (0.1)  | 0 (0.0) | 0 (0.0) | 13 (0.5) | 0 (0.0)  | 0 (0.0) | 0 (0.0) |
| Paronychia                             | 20 (0.7) | 1 (0.0)  | 0 (0.0) | 0 (0.0) | 5 (0.2)  | 0 (0.0)  | 0 (0.0) | 0 (0.0) |
| Ear infection                          | 19 (0.7) | 1 (0.0)  | 0 (0.0) | 0 (0.0) | 16 (0.6) | 1 (0.0)  | 0 (0.0) | 0 (0.0) |
| Haematoma                              | 19 (0.7) | 1 (0.0)  | 0 (0.0) | 0 (0.0) | 7 (0.3)  | 0 (0.0)  | 0 (0.0) | 0 (0.0) |
| Libido decreased                       | 19 (0.7) | 2 (0.1)  | 0 (0.0) | 0 (0.0) | 28 (1.0) | 0 (0.0)  | 0 (0.0) | 0 (0.0) |
| Rib fracture                           | 19 (0.7) | 2 (0.1)  | 0 (0.0) | 0 (0.0) | 10 (0.4) | 0 (0.0)  | 0 (0.0) | 0 (0.0) |
| Superficial vein thrombosis            | 19 (0.7) | 1 (0.0)  | 0 (0.0) | 0 (0.0) | 5 (0.2)  | 0 (0.0)  | 0 (0.0) | 0 (0.0) |
| Hyperlipidaemia                        | 18 (0.6) | 2 (0.1)  | 0 (0.0) | 0 (0.0) | 14 (0.5) | 0 (0.0)  | 0 (0.0) | 0 (0.0) |
| Dental caries                          | 16 (0.6) | 2 (0.1)  | 0 (0.0) | 0 (0.0) | 23 (0.8) | 0 (0.0)  | 0 (0.0) | 0 (0.0) |
| Hyernatraemia                          | 16 (0.6) | 1 (0.0)  | 0 (0.0) | 0 (0.0) | 7 (0.3)  | 0 (0.0)  | 0 (0.0) | 0 (0.0) |
| Anal fissure                           | 15 (0.5) | 1 (0.0)  | 0 (0.0) | 0 (0.0) | 3 (0.1)  | 0 (0.0)  | 0 (0.0) | 0 (0.0) |
| Erysipelas                             | 15 (0.5) | 9 (0.3)  | 0 (0.0) | 0 (0.0) | 10 (0.4) | 0 (0.0)  | 0 (0.0) | 0 (0.0) |
| Gingivitis                             | 15 (0.5) | 1 (0.0)  | 0 (0.0) | 0 (0.0) | 16 (0.6) | 0 (0.0)  | 0 (0.0) | 0 (0.0) |
| Ligament sprain                        | 15 (0.5) | 1 (0.0)  | 0 (0.0) | 0 (0.0) | 24 (0.9) | 0 (0.0)  | 0 (0.0) | 0 (0.0) |
| Nephrolithiasis                        | 14 (0.5) | 4 (0.1)  | 0 (0.0) | 0 (0.0) | 15 (0.5) | 4 (0.1)  | 0 (0.0) | 0 (0.0) |
| Tooth infection                        | 14 (0.5) | 4 (0.1)  | 0 (0.0) | 0 (0.0) | 15 (0.5) | 1 (0.0)  | 0 (0.0) | 0 (0.0) |
| Colitis                                | 13 (0.5) | 5 (0.2)  | 0 (0.0) | 0 (0.0) | 8 (0.3)  | 4 (0.1)  | 0 (0.0) | 0 (0.0) |
| Foot fracture                          | 13 (0.5) | 1 (0.0)  | 0 (0.0) | 0 (0.0) | 7 (0.3)  | 0 (0.0)  | 0 (0.0) | 0 (0.0) |
| Hypoglycaemia                          | 13 (0.5) | 0 (0.0)  | 1 (0.0) | 0 (0.0) | 5 (0.2)  | 0 (0.0)  | 0 (0.0) | 0 (0.0) |
| Laryngitis                             | 13 (0.5) | 1 (0.0)  | 0 (0.0) | 0 (0.0) | 10 (0.4) | 0 (0.0)  | 0 (0.0) | 0 (0.0) |
| Wound infection                        | 13 (0.5) | 3 (0.1)  | 0 (0.0) | 0 (0.0) | 4 (0.1)  | 4 (0.1)  | 0 (0.0) | 0 (0.0) |
| Intervertebral disc protrusion         | 12 (0.4) | 1 (0.0)  | 0 (0.0) | 0 (0.0) | 17 (0.6) | 3 (0.1)  | 0 (0.0) | 0 (0.0) |
| Mammoplasty                            | 12 (0.4) | 4 (0.1)  | 0 (0.0) | 0 (0.0) | 9 (0.3)  | 4 (0.1)  | 0 (0.0) | 0 (0.0) |
| Syncope                                | 12 (0.4) | 16 (0.6) | 0 (0.0) | 0 (0.0) | 5 (0.2)  | 12 (0.4) | 0 (0.0) | 0 (0.0) |
| Uterine leiomyoma*b                    | 12 (0.4) | 1 (0.0)  | 0 (0.0) | 0 (0.0) | 17 (0.6) | 1 (0.0)  | 0 (0.0) | 0 (0.0) |
| Anal haemorrhage                       | 11 (0.4) | 1 (0.0)  | 0 (0.0) | 0 (0.0) | 2 (0.1)  | 0 (0.0)  | 0 (0.0) | 0 (0.0) |
| Blood creatine phosphokinase increased | 11 (0.4) | 1 (0.0)  | 0 (0.0) | 0 (0.0) | 4 (0.1)  | 0 (0.0)  | 0 (0.0) | 0 (0.0) |

|                                       |          |         |         |         |          |         |         |         |
|---------------------------------------|----------|---------|---------|---------|----------|---------|---------|---------|
| Breast cellulitis                     | 11 (0-4) | 6 (0-2) | 0 (0-0) | 0 (0-0) | 4 (0-1)  | 4 (0-1) | 0 (0-0) | 0 (0-0) |
| Presyncope                            | 11 (0-4) | 3 (0-1) | 0 (0-0) | 0 (0-0) | 4 (0-1)  | 0 (0-0) | 0 (0-0) | 0 (0-0) |
| Renal impairment                      | 11 (0-4) | 2 (0-1) | 0 (0-0) | 0 (0-0) | 0 (0-0)  | 0 (0-0) | 0 (0-0) | 0 (0-0) |
| Sinus tachycardia                     | 11 (0-4) | 2 (0-1) | 0 (0-0) | 0 (0-0) | 15 (0-5) | 1 (0-0) | 0 (0-0) | 0 (0-0) |
| Thrombophlebitis                      | 11 (0-4) | 1 (0-0) | 0 (0-0) | 0 (0-0) | 1 (0-0)  | 0 (0-0) | 0 (0-0) | 0 (0-0) |
| Carpal tunnel syndrome                | 10 (0-4) | 1 (0-0) | 0 (0-0) | 0 (0-0) | 24 (0-9) | 3 (0-1) | 0 (0-0) | 0 (0-0) |
| Folliculitis                          | 10 (0-4) | 1 (0-0) | 0 (0-0) | 0 (0-0) | 11 (0-4) | 0 (0-0) | 0 (0-0) | 0 (0-0) |
| Postoperative wound infection         | 10 (0-4) | 4 (0-1) | 0 (0-0) | 0 (0-0) | 6 (0-2)  | 0 (0-0) | 0 (0-0) | 0 (0-0) |
| General physical health deterioration | 9 (0-3)  | 2 (0-1) | 0 (0-0) | 1 (0-0) | 0 (0-0)  | 2 (0-1) | 0 (0-0) | 0 (0-0) |
| Salpingo-oophorectomy bilateral*b     | 9 (0-3)  | 2 (0-1) | 0 (0-0) | 0 (0-0) | 5 (0-2)  | 0 (0-0) | 0 (0-0) | 0 (0-0) |
| Wound complication                    | 9 (0-3)  | 1 (0-0) | 0 (0-0) | 0 (0-0) | 11 (0-4) | 1 (0-0) | 0 (0-0) | 0 (0-0) |
| Wound dehiscence                      | 9 (0-3)  | 2 (0-1) | 0 (0-0) | 0 (0-0) | 6 (0-2)  | 8 (0-3) | 0 (0-0) | 0 (0-0) |
| Asthma                                | 8 (0-3)  | 1 (0-0) | 0 (0-0) | 0 (0-0) | 14 (0-5) | 1 (0-0) | 0 (0-0) | 0 (0-0) |
| Hepatic function abnormal             | 8 (0-3)  | 3 (0-1) | 0 (0-0) | 0 (0-0) | 8 (0-3)  | 1 (0-0) | 0 (0-0) | 0 (0-0) |
| Rash pustular                         | 8 (0-3)  | 1 (0-0) | 0 (0-0) | 0 (0-0) | 5 (0-2)  | 0 (0-0) | 0 (0-0) | 0 (0-0) |
| Renal failure                         | 8 (0-3)  | 4 (0-1) | 0 (0-0) | 0 (0-0) | 2 (0-1)  | 0 (0-0) | 0 (0-0) | 0 (0-0) |
| Rotator cuff syndrome                 | 8 (0-3)  | 1 (0-0) | 0 (0-0) | 0 (0-0) | 7 (0-3)  | 0 (0-0) | 0 (0-0) | 0 (0-0) |
| Acute kidney injury                   | 7 (0-3)  | 5 (0-2) | 1 (0-0) | 1 (0-0) | 1 (0-0)  | 0 (0-0) | 0 (0-0) | 1 (0-0) |
| Anal incontinence                     | 7 (0-3)  | 1 (0-0) | 0 (0-0) | 0 (0-0) | 4 (0-1)  | 0 (0-0) | 0 (0-0) | 0 (0-0) |
| Atrial fibrillation                   | 7 (0-3)  | 7 (0-3) | 0 (0-0) | 0 (0-0) | 11 (0-4) | 2 (0-1) | 0 (0-0) | 0 (0-0) |
| Drug hypersensitivity                 | 7 (0-3)  | 1 (0-0) | 0 (0-0) | 0 (0-0) | 2 (0-1)  | 0 (0-0) | 0 (0-0) | 0 (0-0) |
| Hypertransaminaemia                   | 7 (0-3)  | 2 (0-1) | 1 (0-0) | 0 (0-0) | 2 (0-1)  | 1 (0-0) | 1 (0-0) | 0 (0-0) |
| Lymphangitis                          | 7 (0-3)  | 3 (0-1) | 0 (0-0) | 0 (0-0) | 1 (0-0)  | 0 (0-0) | 0 (0-0) | 0 (0-0) |
| Psoriasis                             | 7 (0-3)  | 1 (0-0) | 0 (0-0) | 0 (0-0) | 4 (0-1)  | 0 (0-0) | 0 (0-0) | 0 (0-0) |
| Ankle fracture                        | 6 (0-2)  | 2 (0-1) | 0 (0-0) | 0 (0-0) | 4 (0-1)  | 3 (0-1) | 0 (0-0) | 0 (0-0) |
| Chronic kidney disease                | 6 (0-2)  | 6 (0-2) | 1 (0-0) | 0 (0-0) | 4 (0-1)  | 0 (0-0) | 0 (0-0) | 0 (0-0) |
| Confusional state                     | 6 (0-2)  | 1 (0-0) | 0 (0-0) | 0 (0-0) | 2 (0-1)  | 1 (0-0) | 0 (0-0) | 0 (0-0) |
| Diabetes mellitus                     | 6 (0-2)  | 2 (0-1) | 0 (0-0) | 0 (0-0) | 13 (0-5) | 0 (0-0) | 0 (0-0) | 0 (0-0) |
| Illness                               | 6 (0-2)  | 1 (0-0) | 0 (0-0) | 0 (0-0) | 0 (0-0)  | 0 (0-0) | 0 (0-0) | 0 (0-0) |
| Impaired healing                      | 6 (0-2)  | 2 (0-1) | 0 (0-0) | 0 (0-0) | 1 (0-0)  | 3 (0-1) | 0 (0-0) | 0 (0-0) |
| Interstitial lung disease             | 6 (0-2)  | 1 (0-0) | 0 (0-0) | 0 (0-0) | 1 (0-0)  | 0 (0-0) | 0 (0-0) | 0 (0-0) |
| Periodontal disease                   | 6 (0-2)  | 1 (0-0) | 0 (0-0) | 0 (0-0) | 9 (0-3)  | 0 (0-0) | 0 (0-0) | 0 (0-0) |

|                                |         |         |         |         |         |         |         |         |
|--------------------------------|---------|---------|---------|---------|---------|---------|---------|---------|
| Pleural effusion               | 6 (0-2) | 2 (0-1) | 0 (0-0) | 0 (0-0) | 5 (0-2) | 2 (0-1) | 0 (0-0) | 1 (0-0) |
| Bilirubin conjugated increased | 5 (0-2) | 1 (0-0) | 1 (0-0) | 0 (0-0) | 3 (0-1) | 0 (0-0) | 0 (0-0) | 0 (0-0) |
| Breast prosthesis removal      | 5 (0-2) | 2 (0-1) | 0 (0-0) | 0 (0-0) | 5 (0-2) | 2 (0-1) | 0 (0-0) | 0 (0-0) |
| C-reactive protein increased   | 5 (0-2) | 1 (0-0) | 0 (0-0) | 0 (0-0) | 2 (0-1) | 0 (0-0) | 0 (0-0) | 0 (0-0) |
| Fracture                       | 5 (0-2) | 1 (0-0) | 0 (0-0) | 0 (0-0) | 3 (0-1) | 0 (0-0) | 0 (0-0) | 0 (0-0) |
| Post procedural complication   | 5 (0-2) | 1 (0-0) | 0 (0-0) | 0 (0-0) | 8 (0-3) | 0 (0-0) | 0 (0-0) | 0 (0-0) |
| Pulpitis dental                | 5 (0-2) | 1 (0-0) | 0 (0-0) | 0 (0-0) | 2 (0-1) | 0 (0-0) | 0 (0-0) | 0 (0-0) |
| Pyelonephritis                 | 5 (0-2) | 1 (0-0) | 0 (0-0) | 0 (0-0) | 2 (0-1) | 1 (0-0) | 0 (0-0) | 0 (0-0) |
| Soft tissue infection          | 5 (0-2) | 1 (0-0) | 0 (0-0) | 0 (0-0) | 3 (0-1) | 0 (0-0) | 0 (0-0) | 0 (0-0) |
| Transaminases increased        | 5 (0-2) | 3 (0-1) | 0 (0-0) | 0 (0-0) | 3 (0-1) | 1 (0-0) | 0 (0-0) | 0 (0-0) |
| Uterine polyp*b                | 5 (0-2) | 1 (0-0) | 0 (0-0) | 0 (0-0) | 8 (0-3) | 2 (0-1) | 0 (0-0) | 0 (0-0) |
| Wrist fracture                 | 5 (0-2) | 1 (0-0) | 0 (0-0) | 0 (0-0) | 9 (0-3) | 0 (0-0) | 0 (0-0) | 0 (0-0) |
| Angina pectoris                | 4 (0-1) | 1 (0-0) | 0 (0-0) | 0 (0-0) | 3 (0-1) | 0 (0-0) | 0 (0-0) | 0 (0-0) |
| Bradycardia                    | 4 (0-1) | 1 (0-0) | 0 (0-0) | 0 (0-0) | 1 (0-0) | 0 (0-0) | 0 (0-0) | 0 (0-0) |
| Cardiac failure                | 4 (0-1) | 2 (0-1) | 0 (0-0) | 2 (0-1) | 4 (0-1) | 4 (0-1) | 0 (0-0) | 0 (0-0) |
| Diverticulitis                 | 4 (0-1) | 2 (0-1) | 1 (0-0) | 0 (0-0) | 7 (0-3) | 4 (0-1) | 0 (0-0) | 0 (0-0) |
| Neutrophil count increased     | 4 (0-1) | 1 (0-0) | 0 (0-0) | 0 (0-0) | 1 (0-0) | 0 (0-0) | 0 (0-0) | 0 (0-0) |
| Peripheral motor neuropathy    | 4 (0-1) | 1 (0-0) | 0 (0-0) | 0 (0-0) | 3 (0-1) | 0 (0-0) | 0 (0-0) | 0 (0-0) |
| Trigeminal neuralgia           | 4 (0-1) | 1 (0-0) | 0 (0-0) | 0 (0-0) | 1 (0-0) | 0 (0-0) | 0 (0-0) | 0 (0-0) |
| Ageusia                        | 3 (0-1) | 1 (0-0) | 0 (0-0) | 0 (0-0) | 7 (0-3) | 0 (0-0) | 0 (0-0) | 0 (0-0) |
| Breast operation               | 3 (0-1) | 1 (0-0) | 0 (0-0) | 0 (0-0) | 2 (0-1) | 0 (0-0) | 0 (0-0) | 0 (0-0) |
| Breast procedural complication | 3 (0-1) | 1 (0-0) | 0 (0-0) | 0 (0-0) | 1 (0-0) | 0 (0-0) | 0 (0-0) | 0 (0-0) |
| Cataract operation             | 3 (0-1) | 1 (0-0) | 0 (0-0) | 0 (0-0) | 1 (0-0) | 3 (0-1) | 0 (0-0) | 0 (0-0) |
| Cholecystitis                  | 3 (0-1) | 8 (0-3) | 1 (0-0) | 0 (0-0) | 2 (0-1) | 5 (0-2) | 0 (0-0) | 0 (0-0) |
| Dacryostenosis acquired        | 3 (0-1) | 1 (0-0) | 0 (0-0) | 0 (0-0) | 0 (0-0) | 0 (0-0) | 0 (0-0) | 0 (0-0) |
| Food poisoning                 | 3 (0-1) | 2 (0-1) | 0 (0-0) | 0 (0-0) | 1 (0-0) | 0 (0-0) | 0 (0-0) | 0 (0-0) |
| Hysterectomy*b                 | 3 (0-1) | 2 (0-1) | 0 (0-0) | 0 (0-0) | 4 (0-1) | 0 (0-0) | 0 (0-0) | 0 (0-0) |
| Oophorectomy*b                 | 3 (0-1) | 3 (0-1) | 0 (0-0) | 0 (0-0) | 1 (0-0) | 1 (0-0) | 0 (0-0) | 0 (0-0) |
| Pericardial effusion           | 3 (0-1) | 2 (0-1) | 0 (0-0) | 0 (0-0) | 0 (0-0) | 0 (0-0) | 0 (0-0) | 0 (0-0) |
| Post procedural infection      | 3 (0-1) | 1 (0-0) | 0 (0-0) | 0 (0-0) | 2 (0-1) | 0 (0-0) | 0 (0-0) | 0 (0-0) |
| Supraventricular extrasystoles | 3 (0-1) | 1 (0-0) | 0 (0-0) | 0 (0-0) | 2 (0-1) | 0 (0-0) | 0 (0-0) | 0 (0-0) |
| Suspected COVID-19             | 3 (0-1) | 0 (0-0) | 0 (0-0) | 1 (0-0) | 0 (0-0) | 0 (0-0) | 0 (0-0) | 0 (0-0) |

|                                                     |         |         |         |         |         |         |         |         |
|-----------------------------------------------------|---------|---------|---------|---------|---------|---------|---------|---------|
| Thyroid cancer                                      | 3 (0-1) | 2 (0-1) | 0 (0-0) | 0 (0-0) | 1 (0-0) | 1 (0-0) | 0 (0-0) | 0 (0-0) |
| Anal abscess                                        | 2 (0-1) | 2 (0-1) | 0 (0-0) | 0 (0-0) | 0 (0-0) | 0 (0-0) | 0 (0-0) | 0 (0-0) |
| Blood bilirubin unconjugated increased              | 2 (0-1) | 1 (0-0) | 0 (0-0) | 0 (0-0) | 0 (0-0) | 0 (0-0) | 0 (0-0) | 0 (0-0) |
| Catheter removal                                    | 2 (0-1) | 1 (0-0) | 0 (0-0) | 0 (0-0) | 2 (0-1) | 0 (0-0) | 0 (0-0) | 0 (0-0) |
| Clostridium difficile infection                     | 2 (0-1) | 2 (0-1) | 0 (0-0) | 0 (0-0) | 1 (0-0) | 0 (0-0) | 0 (0-0) | 0 (0-0) |
| Deafness                                            | 2 (0-1) | 1 (0-0) | 0 (0-0) | 0 (0-0) | 2 (0-1) | 1 (0-0) | 0 (0-0) | 0 (0-0) |
| Delirium                                            | 2 (0-1) | 1 (0-0) | 0 (0-0) | 0 (0-0) | 1 (0-0) | 1 (0-0) | 0 (0-0) | 0 (0-0) |
| Dental operation                                    | 2 (0-1) | 1 (0-0) | 0 (0-0) | 0 (0-0) | 0 (0-0) | 0 (0-0) | 0 (0-0) | 0 (0-0) |
| Drug-induced liver injury                           | 2 (0-1) | 1 (0-0) | 0 (0-0) | 0 (0-0) | 1 (0-0) | 0 (0-0) | 0 (0-0) | 0 (0-0) |
| Enteritis                                           | 2 (0-1) | 1 (0-0) | 0 (0-0) | 0 (0-0) | 0 (0-0) | 0 (0-0) | 0 (0-0) | 0 (0-0) |
| Hysterosalpingo-oophorectomy*b                      | 2 (0-1) | 1 (0-0) | 0 (0-0) | 0 (0-0) | 7 (0-3) | 1 (0-0) | 0 (0-0) | 0 (0-0) |
| International normalised ratio increased            | 2 (0-1) | 1 (0-0) | 0 (0-0) | 0 (0-0) | 1 (0-0) | 1 (0-0) | 0 (0-0) | 0 (0-0) |
| Leukocytosis                                        | 2 (0-1) | 2 (0-1) | 0 (0-0) | 0 (0-0) | 3 (0-1) | 1 (0-0) | 0 (0-0) | 0 (0-0) |
| Liver function test abnormal                        | 2 (0-1) | 2 (0-1) | 0 (0-0) | 0 (0-0) | 0 (0-0) | 0 (0-0) | 0 (0-0) | 0 (0-0) |
| Myocardial ischaemia                                | 2 (0-1) | 1 (0-0) | 0 (0-0) | 0 (0-0) | 1 (0-0) | 0 (0-0) | 0 (0-0) | 0 (0-0) |
| Myositis                                            | 2 (0-1) | 1 (0-0) | 0 (0-0) | 0 (0-0) | 0 (0-0) | 0 (0-0) | 0 (0-0) | 0 (0-0) |
| Pancytopenia                                        | 2 (0-1) | 3 (0-1) | 0 (0-0) | 0 (0-0) | 0 (0-0) | 0 (0-0) | 0 (0-0) | 0 (0-0) |
| Pulmonary hypertension                              | 2 (0-1) | 1 (0-0) | 0 (0-0) | 0 (0-0) | 1 (0-0) | 0 (0-0) | 0 (0-0) | 0 (0-0) |
| Radius fracture                                     | 2 (0-1) | 3 (0-1) | 0 (0-0) | 0 (0-0) | 7 (0-3) | 3 (0-1) | 0 (0-0) | 0 (0-0) |
| Skin reaction                                       | 2 (0-1) | 0 (0-0) | 1 (0-0) | 0 (0-0) | 1 (0-0) | 0 (0-0) | 0 (0-0) | 0 (0-0) |
| Vulvovaginal pain*b                                 | 2 (0-1) | 1 (0-0) | 0 (0-0) | 0 (0-0) | 4 (0-1) | 0 (0-0) | 0 (0-0) | 0 (0-0) |
| Amylase increased                                   | 1 (0-0) | 1 (0-0) | 0 (0-0) | 0 (0-0) | 0 (0-0) | 0 (0-0) | 0 (0-0) | 0 (0-0) |
| Anaphylactic reaction                               | 1 (0-0) | 2 (0-1) | 0 (0-0) | 0 (0-0) | 2 (0-1) | 1 (0-0) | 0 (0-0) | 0 (0-0) |
| Bacteraemia                                         | 1 (0-0) | 2 (0-1) | 0 (0-0) | 0 (0-0) | 1 (0-0) | 0 (0-0) | 0 (0-0) | 0 (0-0) |
| Bipolar disorder                                    | 1 (0-0) | 2 (0-1) | 0 (0-0) | 0 (0-0) | 0 (0-0) | 0 (0-0) | 0 (0-0) | 0 (0-0) |
| Breast abscess                                      | 1 (0-0) | 4 (0-1) | 0 (0-0) | 0 (0-0) | 0 (0-0) | 1 (0-0) | 0 (0-0) | 0 (0-0) |
| Breast inflammation                                 | 1 (0-0) | 3 (0-1) | 0 (0-0) | 0 (0-0) | 4 (0-1) | 1 (0-0) | 0 (0-0) | 0 (0-0) |
| COVID-19 pneumonia                                  | 1 (0-0) | 5 (0-2) | 2 (0-1) | 1 (0-0) | 0 (0-0) | 0 (0-0) | 0 (0-0) | 1 (0-0) |
| Capsular contracture associated with breast implant | 1 (0-0) | 2 (0-1) | 0 (0-0) | 0 (0-0) | 2 (0-1) | 1 (0-0) | 0 (0-0) | 0 (0-0) |
| Cerebral infarction                                 | 1 (0-0) | 1 (0-0) | 0 (0-0) | 0 (0-0) | 1 (0-0) | 0 (0-0) | 0 (0-0) | 0 (0-0) |
| Cerebrovascular accident                            | 1 (0-0) | 0 (0-0) | 0 (0-0) | 1 (0-0) | 0 (0-0) | 2 (0-1) | 0 (0-0) | 0 (0-0) |
| Cholecystitis acute                                 | 1 (0-0) | 4 (0-1) | 0 (0-0) | 0 (0-0) | 2 (0-1) | 0 (0-0) | 0 (0-0) | 0 (0-0) |

|                                    |         |         |         |         |         |         |         |         |
|------------------------------------|---------|---------|---------|---------|---------|---------|---------|---------|
| Clavicle fracture                  | 1 (0-0) | 3 (0-1) | 0 (0-0) | 0 (0-0) | 0 (0-0) | 0 (0-0) | 0 (0-0) | 0 (0-0) |
| Colitis ischaemic                  | 1 (0-0) | 1 (0-0) | 0 (0-0) | 0 (0-0) | 0 (0-0) | 0 (0-0) | 0 (0-0) | 0 (0-0) |
| Debridement                        | 1 (0-0) | 1 (0-0) | 0 (0-0) | 0 (0-0) | 0 (0-0) | 0 (0-0) | 0 (0-0) | 0 (0-0) |
| Device related infection           | 1 (0-0) | 1 (0-0) | 0 (0-0) | 0 (0-0) | 1 (0-0) | 5 (0-2) | 0 (0-0) | 0 (0-0) |
| Extrapyramidal disorder            | 1 (0-0) | 1 (0-0) | 0 (0-0) | 0 (0-0) | 0 (0-0) | 0 (0-0) | 0 (0-0) | 0 (0-0) |
| Febrile infection                  | 1 (0-0) | 1 (0-0) | 0 (0-0) | 0 (0-0) | 0 (0-0) | 0 (0-0) | 0 (0-0) | 0 (0-0) |
| Hepatic cirrhosis                  | 1 (0-0) | 1 (0-0) | 0 (0-0) | 0 (0-0) | 0 (0-0) | 0 (0-0) | 0 (0-0) | 0 (0-0) |
| Hepatic enzyme increased           | 1 (0-0) | 1 (0-0) | 0 (0-0) | 0 (0-0) | 5 (0-2) | 0 (0-0) | 0 (0-0) | 0 (0-0) |
| Hepatic failure                    | 1 (0-0) | 2 (0-1) | 0 (0-0) | 0 (0-0) | 0 (0-0) | 0 (0-0) | 0 (0-0) | 0 (0-0) |
| Hepatic mass                       | 1 (0-0) | 1 (0-0) | 0 (0-0) | 0 (0-0) | 0 (0-0) | 0 (0-0) | 0 (0-0) | 0 (0-0) |
| Hepatitis E                        | 1 (0-0) | 1 (0-0) | 0 (0-0) | 0 (0-0) | 0 (0-0) | 0 (0-0) | 0 (0-0) | 0 (0-0) |
| Hypoxia                            | 1 (0-0) | 2 (0-1) | 1 (0-0) | 1 (0-0) | 0 (0-0) | 1 (0-0) | 0 (0-0) | 0 (0-0) |
| Incisional hernia                  | 1 (0-0) | 1 (0-0) | 0 (0-0) | 0 (0-0) | 0 (0-0) | 0 (0-0) | 0 (0-0) | 0 (0-0) |
| Ligament rupture                   | 1 (0-0) | 1 (0-0) | 0 (0-0) | 0 (0-0) | 0 (0-0) | 0 (0-0) | 0 (0-0) | 0 (0-0) |
| Lower gastrointestinal haemorrhage | 1 (0-0) | 1 (0-0) | 0 (0-0) | 0 (0-0) | 0 (0-0) | 0 (0-0) | 0 (0-0) | 0 (0-0) |
| Meningioma benign                  | 1 (0-0) | 1 (0-0) | 0 (0-0) | 0 (0-0) | 0 (0-0) | 0 (0-0) | 0 (0-0) | 0 (0-0) |
| Myelodysplastic syndrome           | 1 (0-0) | 2 (0-1) | 0 (0-0) | 0 (0-0) | 1 (0-0) | 0 (0-0) | 0 (0-0) | 0 (0-0) |
| Nerve compression                  | 1 (0-0) | 1 (0-0) | 0 (0-0) | 0 (0-0) | 2 (0-1) | 0 (0-0) | 0 (0-0) | 0 (0-0) |
| Organising pneumonia               | 1 (0-0) | 1 (0-0) | 0 (0-0) | 0 (0-0) | 3 (0-1) | 0 (0-0) | 0 (0-0) | 0 (0-0) |
| Osteonecrosis                      | 1 (0-0) | 1 (0-0) | 0 (0-0) | 0 (0-0) | 0 (0-0) | 0 (0-0) | 0 (0-0) | 0 (0-0) |
| Pancreatitis acute                 | 1 (0-0) | 2 (0-1) | 0 (0-0) | 0 (0-0) | 0 (0-0) | 0 (0-0) | 0 (0-0) | 0 (0-0) |
| Pleuritic pain                     | 1 (0-0) | 1 (0-0) | 0 (0-0) | 0 (0-0) | 1 (0-0) | 0 (0-0) | 0 (0-0) | 0 (0-0) |
| Pneumonia bacterial                | 1 (0-0) | 1 (0-0) | 0 (0-0) | 0 (0-0) | 1 (0-0) | 1 (0-0) | 0 (0-0) | 0 (0-0) |
| Respiratory failure                | 1 (0-0) | 0 (0-0) | 3 (0-1) | 0 (0-0) | 0 (0-0) | 1 (0-0) | 1 (0-0) | 0 (0-0) |
| Retinal detachment                 | 1 (0-0) | 3 (0-1) | 0 (0-0) | 0 (0-0) | 1 (0-0) | 1 (0-0) | 0 (0-0) | 0 (0-0) |
| Schwannoma                         | 1 (0-0) | 1 (0-0) | 0 (0-0) | 0 (0-0) | 1 (0-0) | 0 (0-0) | 0 (0-0) | 0 (0-0) |
| Suicidal ideation                  | 1 (0-0) | 1 (0-0) | 0 (0-0) | 0 (0-0) | 0 (0-0) | 0 (0-0) | 0 (0-0) | 0 (0-0) |
| Transient ischaemic attack         | 1 (0-0) | 1 (0-0) | 0 (0-0) | 0 (0-0) | 4 (0-1) | 0 (0-0) | 0 (0-0) | 0 (0-0) |
| Abdominal wound dehiscence         | 0 (0-0) | 1 (0-0) | 0 (0-0) | 0 (0-0) | 0 (0-0) | 0 (0-0) | 0 (0-0) | 0 (0-0) |
| Abscess                            | 0 (0-0) | 1 (0-0) | 0 (0-0) | 0 (0-0) | 3 (0-1) | 0 (0-0) | 0 (0-0) | 0 (0-0) |
| Acute left ventricular failure     | 0 (0-0) | 0 (0-0) | 1 (0-0) | 0 (0-0) | 0 (0-0) | 0 (0-0) | 0 (0-0) | 0 (0-0) |
| Acute myeloid leukaemia            | 0 (0-0) | 1 (0-0) | 0 (0-0) | 0 (0-0) | 0 (0-0) | 0 (0-0) | 0 (0-0) | 0 (0-0) |

|                                        |         |         |         |         |         |         |         |         |
|----------------------------------------|---------|---------|---------|---------|---------|---------|---------|---------|
| Alcohol poisoning                      | 0 (0-0) | 1 (0-0) | 0 (0-0) | 0 (0-0) | 0 (0-0) | 0 (0-0) | 0 (0-0) | 0 (0-0) |
| Angle closure glaucoma                 | 0 (0-0) | 1 (0-0) | 0 (0-0) | 0 (0-0) | 0 (0-0) | 0 (0-0) | 0 (0-0) | 0 (0-0) |
| Appendicitis                           | 0 (0-0) | 6 (0-2) | 0 (0-0) | 0 (0-0) | 0 (0-0) | 1 (0-0) | 1 (0-0) | 0 (0-0) |
| Appendicitis perforated                | 0 (0-0) | 0 (0-0) | 1 (0-0) | 0 (0-0) | 0 (0-0) | 0 (0-0) | 0 (0-0) | 0 (0-0) |
| Basilar artery thrombosis              | 0 (0-0) | 1 (0-0) | 0 (0-0) | 0 (0-0) | 0 (0-0) | 0 (0-0) | 0 (0-0) | 0 (0-0) |
| Bicytopenia                            | 0 (0-0) | 1 (0-0) | 0 (0-0) | 0 (0-0) | 0 (0-0) | 0 (0-0) | 0 (0-0) | 0 (0-0) |
| Biliary tract infection                | 0 (0-0) | 0 (0-0) | 1 (0-0) | 0 (0-0) | 0 (0-0) | 0 (0-0) | 0 (0-0) | 0 (0-0) |
| Biopsy endometrium*b                   | 0 (0-0) | 1 (0-0) | 0 (0-0) | 0 (0-0) | 0 (0-0) | 0 (0-0) | 0 (0-0) | 0 (0-0) |
| Bone marrow oedema                     | 0 (0-0) | 1 (0-0) | 0 (0-0) | 0 (0-0) | 1 (0-0) | 0 (0-0) | 0 (0-0) | 0 (0-0) |
| Borderline ovarian tumour*b            | 0 (0-0) | 1 (0-0) | 0 (0-0) | 0 (0-0) | 0 (0-0) | 0 (0-0) | 0 (0-0) | 0 (0-0) |
| Breast capsulotomy                     | 0 (0-0) | 1 (0-0) | 0 (0-0) | 0 (0-0) | 0 (0-0) | 0 (0-0) | 0 (0-0) | 0 (0-0) |
| Breast disorder                        | 0 (0-0) | 1 (0-0) | 0 (0-0) | 0 (0-0) | 0 (0-0) | 0 (0-0) | 0 (0-0) | 0 (0-0) |
| Campylobacter gastroenteritis          | 0 (0-0) | 1 (0-0) | 0 (0-0) | 0 (0-0) | 0 (0-0) | 0 (0-0) | 0 (0-0) | 0 (0-0) |
| Cardiac arrest                         | 0 (0-0) | 0 (0-0) | 1 (0-0) | 1 (0-0) | 0 (0-0) | 0 (0-0) | 0 (0-0) | 0 (0-0) |
| Cellulitis staphylococcal              | 0 (0-0) | 1 (0-0) | 0 (0-0) | 0 (0-0) | 0 (0-0) | 0 (0-0) | 0 (0-0) | 0 (0-0) |
| Cellulitis streptococcal               | 0 (0-0) | 1 (0-0) | 0 (0-0) | 0 (0-0) | 0 (0-0) | 0 (0-0) | 0 (0-0) | 0 (0-0) |
| Cerebral haemorrhage                   | 0 (0-0) | 1 (0-0) | 0 (0-0) | 1 (0-0) | 0 (0-0) | 0 (0-0) | 0 (0-0) | 0 (0-0) |
| Cerebral venous thrombosis             | 0 (0-0) | 1 (0-0) | 1 (0-0) | 0 (0-0) | 0 (0-0) | 1 (0-0) | 0 (0-0) | 0 (0-0) |
| Cervical dysplasia*b                   | 0 (0-0) | 2 (0-1) | 0 (0-0) | 0 (0-0) | 1 (0-0) | 1 (0-0) | 0 (0-0) | 0 (0-0) |
| Cervicogenic headache                  | 0 (0-0) | 1 (0-0) | 0 (0-0) | 0 (0-0) | 0 (0-0) | 0 (0-0) | 0 (0-0) | 0 (0-0) |
| Chest tube insertion                   | 0 (0-0) | 1 (0-0) | 0 (0-0) | 0 (0-0) | 0 (0-0) | 0 (0-0) | 0 (0-0) | 0 (0-0) |
| Cholecystectomy                        | 0 (0-0) | 3 (0-1) | 0 (0-0) | 0 (0-0) | 4 (0-1) | 0 (0-0) | 0 (0-0) | 0 (0-0) |
| Chronic obstructive pulmonary disease  | 0 (0-0) | 0 (0-0) | 1 (0-0) | 0 (0-0) | 3 (0-1) | 0 (0-0) | 0 (0-0) | 0 (0-0) |
| Clostridium colitis                    | 0 (0-0) | 1 (0-0) | 0 (0-0) | 0 (0-0) | 0 (0-0) | 0 (0-0) | 0 (0-0) | 0 (0-0) |
| Clostridium difficile colitis          | 0 (0-0) | 1 (0-0) | 0 (0-0) | 0 (0-0) | 0 (0-0) | 0 (0-0) | 0 (0-0) | 0 (0-0) |
| Coeliac disease                        | 0 (0-0) | 1 (0-0) | 0 (0-0) | 0 (0-0) | 0 (0-0) | 0 (0-0) | 0 (0-0) | 0 (0-0) |
| Colon cancer                           | 0 (0-0) | 1 (0-0) | 0 (0-0) | 0 (0-0) | 0 (0-0) | 1 (0-0) | 0 (0-0) | 0 (0-0) |
| Colorectal adenoma                     | 0 (0-0) | 1 (0-0) | 0 (0-0) | 0 (0-0) | 1 (0-0) | 0 (0-0) | 0 (0-0) | 0 (0-0) |
| Deafness neurosensory                  | 0 (0-0) | 0 (0-0) | 1 (0-0) | 0 (0-0) | 0 (0-0) | 0 (0-0) | 0 (0-0) | 0 (0-0) |
| Diabetic retinopathy                   | 0 (0-0) | 1 (0-0) | 0 (0-0) | 0 (0-0) | 0 (0-0) | 0 (0-0) | 0 (0-0) | 0 (0-0) |
| Disseminated intravascular coagulation | 0 (0-0) | 0 (0-0) | 1 (0-0) | 0 (0-0) | 0 (0-0) | 0 (0-0) | 0 (0-0) | 0 (0-0) |
| Eating disorder                        | 0 (0-0) | 1 (0-0) | 0 (0-0) | 0 (0-0) | 0 (0-0) | 0 (0-0) | 0 (0-0) | 0 (0-0) |

|                                                 |         |         |         |         |         |         |         |         |
|-------------------------------------------------|---------|---------|---------|---------|---------|---------|---------|---------|
| Embolism                                        | 0 (0-0) | 0 (0-0) | 1 (0-0) | 0 (0-0) | 0 (0-0) | 0 (0-0) | 0 (0-0) | 0 (0-0) |
| Endometrial cancer*b                            | 0 (0-0) | 1 (0-0) | 0 (0-0) | 0 (0-0) | 0 (0-0) | 0 (0-0) | 0 (0-0) | 0 (0-0) |
| Febrile neutropenia                             | 0 (0-0) | 6 (0-2) | 2 (0-1) | 0 (0-0) | 0 (0-0) | 0 (0-0) | 1 (0-0) | 0 (0-0) |
| Femoral neck fracture                           | 0 (0-0) | 1 (0-0) | 0 (0-0) | 0 (0-0) | 1 (0-0) | 0 (0-0) | 0 (0-0) | 0 (0-0) |
| Fibroadenoma of breast                          | 0 (0-0) | 1 (0-0) | 0 (0-0) | 0 (0-0) | 0 (0-0) | 0 (0-0) | 0 (0-0) | 0 (0-0) |
| Fibrocystic breast disease                      | 0 (0-0) | 1 (0-0) | 0 (0-0) | 0 (0-0) | 2 (0-1) | 1 (0-0) | 0 (0-0) | 0 (0-0) |
| Food intolerance                                | 0 (0-0) | 1 (0-0) | 0 (0-0) | 0 (0-0) | 0 (0-0) | 0 (0-0) | 0 (0-0) | 0 (0-0) |
| Forearm fracture                                | 0 (0-0) | 1 (0-0) | 0 (0-0) | 0 (0-0) | 0 (0-0) | 0 (0-0) | 0 (0-0) | 0 (0-0) |
| Fractured coccyx                                | 0 (0-0) | 1 (0-0) | 0 (0-0) | 0 (0-0) | 1 (0-0) | 0 (0-0) | 0 (0-0) | 0 (0-0) |
| Gallbladder operation                           | 0 (0-0) | 1 (0-0) | 0 (0-0) | 0 (0-0) | 0 (0-0) | 0 (0-0) | 0 (0-0) | 0 (0-0) |
| Gastric cancer                                  | 0 (0-0) | 1 (0-0) | 0 (0-0) | 0 (0-0) | 0 (0-0) | 0 (0-0) | 0 (0-0) | 0 (0-0) |
| Gastric haemorrhage                             | 0 (0-0) | 1 (0-0) | 0 (0-0) | 0 (0-0) | 0 (0-0) | 0 (0-0) | 0 (0-0) | 0 (0-0) |
| Gastritis erosive                               | 0 (0-0) | 1 (0-0) | 0 (0-0) | 0 (0-0) | 2 (0-1) | 0 (0-0) | 0 (0-0) | 0 (0-0) |
| Gastroenteritis clostridial                     | 0 (0-0) | 1 (0-0) | 0 (0-0) | 0 (0-0) | 0 (0-0) | 0 (0-0) | 0 (0-0) | 0 (0-0) |
| Gastrointestinal fistula                        | 0 (0-0) | 0 (0-0) | 1 (0-0) | 0 (0-0) | 0 (0-0) | 0 (0-0) | 0 (0-0) | 0 (0-0) |
| Haematotoxicity                                 | 0 (0-0) | 1 (0-0) | 0 (0-0) | 0 (0-0) | 0 (0-0) | 0 (0-0) | 0 (0-0) | 0 (0-0) |
| Haemolytic anaemia                              | 0 (0-0) | 1 (0-0) | 0 (0-0) | 0 (0-0) | 0 (0-0) | 0 (0-0) | 0 (0-0) | 0 (0-0) |
| Haemorrhage intracranial                        | 0 (0-0) | 0 (0-0) | 1 (0-0) | 0 (0-0) | 0 (0-0) | 0 (0-0) | 0 (0-0) | 0 (0-0) |
| Hepatotoxicity                                  | 0 (0-0) | 1 (0-0) | 0 (0-0) | 0 (0-0) | 2 (0-1) | 0 (0-0) | 0 (0-0) | 0 (0-0) |
| Hip fracture                                    | 0 (0-0) | 2 (0-1) | 0 (0-0) | 0 (0-0) | 2 (0-1) | 1 (0-0) | 0 (0-0) | 0 (0-0) |
| Hyperglycaemic hyperosmolar nonketotic syndrome | 0 (0-0) | 1 (0-0) | 0 (0-0) | 0 (0-0) | 0 (0-0) | 0 (0-0) | 0 (0-0) | 0 (0-0) |
| Hypokinesia                                     | 0 (0-0) | 1 (0-0) | 0 (0-0) | 0 (0-0) | 0 (0-0) | 0 (0-0) | 0 (0-0) | 0 (0-0) |
| Immune thrombocytopenia                         | 0 (0-0) | 0 (0-0) | 1 (0-0) | 0 (0-0) | 0 (0-0) | 0 (0-0) | 0 (0-0) | 0 (0-0) |
| Implant site dehiscence                         | 0 (0-0) | 1 (0-0) | 0 (0-0) | 0 (0-0) | 0 (0-0) | 0 (0-0) | 0 (0-0) | 0 (0-0) |
| Implant site infection                          | 0 (0-0) | 1 (0-0) | 0 (0-0) | 0 (0-0) | 0 (0-0) | 0 (0-0) | 0 (0-0) | 0 (0-0) |
| Incarcerated hernia                             | 0 (0-0) | 1 (0-0) | 0 (0-0) | 0 (0-0) | 0 (0-0) | 0 (0-0) | 0 (0-0) | 0 (0-0) |
| Intestinal obstruction                          | 0 (0-0) | 1 (0-0) | 2 (0-1) | 0 (0-0) | 0 (0-0) | 2 (0-1) | 0 (0-0) | 0 (0-0) |
| Ischaemic stroke                                | 0 (0-0) | 2 (0-1) | 1 (0-0) | 0 (0-0) | 1 (0-0) | 0 (0-0) | 0 (0-0) | 0 (0-0) |
| Japanese spotted fever                          | 0 (0-0) | 1 (0-0) | 0 (0-0) | 0 (0-0) | 0 (0-0) | 0 (0-0) | 0 (0-0) | 0 (0-0) |
| Lacrimal duct procedure                         | 0 (0-0) | 1 (0-0) | 0 (0-0) | 0 (0-0) | 0 (0-0) | 0 (0-0) | 0 (0-0) | 0 (0-0) |
| Lipase increased                                | 0 (0-0) | 1 (0-0) | 0 (0-0) | 0 (0-0) | 0 (0-0) | 0 (0-0) | 0 (0-0) | 0 (0-0) |
| Lipoinjection                                   | 0 (0-0) | 1 (0-0) | 0 (0-0) | 0 (0-0) | 0 (0-0) | 0 (0-0) | 0 (0-0) | 0 (0-0) |

|                                        |         |          |         |         |         |         |         |         |
|----------------------------------------|---------|----------|---------|---------|---------|---------|---------|---------|
| Lumbar vertebral fracture              | 0 (0-0) | 1 (0-0)  | 0 (0-0) | 0 (0-0) | 2 (0-1) | 0 (0-0) | 0 (0-0) | 0 (0-0) |
| Lymphatic obstruction                  | 0 (0-0) | 1 (0-0)  | 0 (0-0) | 0 (0-0) | 0 (0-0) | 0 (0-0) | 0 (0-0) | 0 (0-0) |
| Lymphoid tissue operation              | 0 (0-0) | 1 (0-0)  | 0 (0-0) | 0 (0-0) | 0 (0-0) | 0 (0-0) | 0 (0-0) | 0 (0-0) |
| Macular degeneration                   | 0 (0-0) | 1 (0-0)  | 0 (0-0) | 0 (0-0) | 1 (0-0) | 0 (0-0) | 0 (0-0) | 0 (0-0) |
| Mantle cell lymphoma                   | 0 (0-0) | 1 (0-0)  | 0 (0-0) | 0 (0-0) | 0 (0-0) | 0 (0-0) | 0 (0-0) | 0 (0-0) |
| Manual lymphatic drainage              | 0 (0-0) | 1 (0-0)  | 0 (0-0) | 0 (0-0) | 0 (0-0) | 0 (0-0) | 0 (0-0) | 0 (0-0) |
| Meningitis viral                       | 0 (0-0) | 1 (0-0)  | 0 (0-0) | 0 (0-0) | 0 (0-0) | 0 (0-0) | 0 (0-0) | 0 (0-0) |
| Mesenteric artery thrombosis           | 0 (0-0) | 0 (0-0)  | 0 (0-0) | 1 (0-0) | 0 (0-0) | 0 (0-0) | 0 (0-0) | 0 (0-0) |
| Metabolic acidosis                     | 0 (0-0) | 1 (0-0)  | 0 (0-0) | 0 (0-0) | 0 (0-0) | 0 (0-0) | 0 (0-0) | 0 (0-0) |
| Multiple fractures                     | 0 (0-0) | 1 (0-0)  | 0 (0-0) | 0 (0-0) | 0 (0-0) | 0 (0-0) | 0 (0-0) | 0 (0-0) |
| Multiple organ dysfunction syndrome    | 0 (0-0) | 0 (0-0)  | 1 (0-0) | 0 (0-0) | 0 (0-0) | 0 (0-0) | 0 (0-0) | 0 (0-0) |
| Myocardial infarction                  | 0 (0-0) | 3 (0-1)  | 0 (0-0) | 1 (0-0) | 0 (0-0) | 4 (0-1) | 0 (0-0) | 0 (0-0) |
| Non-small cell lung cancer             | 0 (0-0) | 1 (0-0)  | 0 (0-0) | 0 (0-0) | 0 (0-0) | 0 (0-0) | 0 (0-0) | 0 (0-0) |
| Obesity                                | 0 (0-0) | 1 (0-0)  | 0 (0-0) | 0 (0-0) | 2 (0-1) | 1 (0-0) | 0 (0-0) | 0 (0-0) |
| Pancreatitis                           | 0 (0-0) | 4 (0-1)  | 2 (0-1) | 0 (0-0) | 0 (0-0) | 2 (0-1) | 0 (0-0) | 0 (0-0) |
| Pelvic haematoma                       | 0 (0-0) | 1 (0-0)  | 0 (0-0) | 0 (0-0) | 0 (0-0) | 0 (0-0) | 0 (0-0) | 0 (0-0) |
| Peripheral artery thrombosis           | 0 (0-0) | 1 (0-0)  | 0 (0-0) | 0 (0-0) | 0 (0-0) | 1 (0-0) | 0 (0-0) | 0 (0-0) |
| Peripheral vascular disorder           | 0 (0-0) | 1 (0-0)  | 0 (0-0) | 0 (0-0) | 0 (0-0) | 0 (0-0) | 0 (0-0) | 0 (0-0) |
| Persecutory delusion                   | 0 (0-0) | 0 (0-0)  | 1 (0-0) | 0 (0-0) | 0 (0-0) | 0 (0-0) | 0 (0-0) | 0 (0-0) |
| Pleurodesis                            | 0 (0-0) | 1 (0-0)  | 0 (0-0) | 0 (0-0) | 0 (0-0) | 0 (0-0) | 0 (0-0) | 0 (0-0) |
| Pneumonia influenzal                   | 0 (0-0) | 1 (0-0)  | 0 (0-0) | 0 (0-0) | 0 (0-0) | 0 (0-0) | 0 (0-0) | 0 (0-0) |
| Pneumonia streptococcal                | 0 (0-0) | 0 (0-0)  | 1 (0-0) | 0 (0-0) | 0 (0-0) | 0 (0-0) | 0 (0-0) | 0 (0-0) |
| Post procedural cellulitis             | 0 (0-0) | 1 (0-0)  | 0 (0-0) | 0 (0-0) | 1 (0-0) | 1 (0-0) | 0 (0-0) | 0 (0-0) |
| Post procedural haematoma              | 0 (0-0) | 1 (0-0)  | 0 (0-0) | 0 (0-0) | 0 (0-0) | 0 (0-0) | 0 (0-0) | 0 (0-0) |
| Post procedural persistent drain fluid | 0 (0-0) | 1 (0-0)  | 0 (0-0) | 0 (0-0) | 0 (0-0) | 0 (0-0) | 0 (0-0) | 0 (0-0) |
| Postoperative adhesion                 | 0 (0-0) | 1 (0-0)  | 0 (0-0) | 0 (0-0) | 0 (0-0) | 0 (0-0) | 0 (0-0) | 0 (0-0) |
| Procedural complication                | 0 (0-0) | 1 (0-0)  | 0 (0-0) | 0 (0-0) | 0 (0-0) | 0 (0-0) | 0 (0-0) | 0 (0-0) |
| Psychotic disorder                     | 0 (0-0) | 0 (0-0)  | 1 (0-0) | 0 (0-0) | 0 (0-0) | 0 (0-0) | 1 (0-0) | 0 (0-0) |
| Pulmonary embolism                     | 0 (0-0) | 24 (0-9) | 3 (0-1) | 0 (0-0) | 0 (0-0) | 3 (0-1) | 0 (0-0) | 1 (0-0) |
| Pulmonary oedema                       | 0 (0-0) | 1 (0-0)  | 0 (0-0) | 0 (0-0) | 0 (0-0) | 0 (0-0) | 0 (0-0) | 0 (0-0) |
| Renal disorder                         | 0 (0-0) | 1 (0-0)  | 0 (0-0) | 0 (0-0) | 0 (0-0) | 0 (0-0) | 0 (0-0) | 0 (0-0) |
| Scar excision                          | 0 (0-0) | 2 (0-1)  | 0 (0-0) | 0 (0-0) | 0 (0-0) | 0 (0-0) | 0 (0-0) | 0 (0-0) |



|                                 |         |         |         |         |         |         |         |         |
|---------------------------------|---------|---------|---------|---------|---------|---------|---------|---------|
| Sepsis                          | 0 (0-0) | 0 (0-0) | 7 (0-3) | 0 (0-0) | 0 (0-0) | 0 (0-0) | 2 (0-1) | 0 (0-0) |
| Sinus node dysfunction          | 0 (0-0) | 1 (0-0) | 0 (0-0) | 0 (0-0) | 0 (0-0) | 0 (0-0) | 0 (0-0) | 0 (0-0) |
| Spondylolisthesis               | 0 (0-0) | 1 (0-0) | 0 (0-0) | 0 (0-0) | 3 (0-1) | 0 (0-0) | 0 (0-0) | 0 (0-0) |
| Squamous cell carcinoma of lung | 0 (0-0) | 1 (0-0) | 0 (0-0) | 0 (0-0) | 0 (0-0) | 0 (0-0) | 0 (0-0) | 0 (0-0) |
| Subarachnoid haemorrhage        | 0 (0-0) | 1 (0-0) | 0 (0-0) | 0 (0-0) | 1 (0-0) | 0 (0-0) | 0 (0-0) | 0 (0-0) |
| Sudden hearing loss             | 0 (0-0) | 1 (0-0) | 0 (0-0) | 0 (0-0) | 2 (0-1) | 0 (0-0) | 0 (0-0) | 0 (0-0) |
| Suicide attempt                 | 0 (0-0) | 2 (0-1) | 0 (0-0) | 0 (0-0) | 0 (0-0) | 0 (0-0) | 2 (0-1) | 0 (0-0) |
| Troponin increased              | 0 (0-0) | 1 (0-0) | 0 (0-0) | 0 (0-0) | 1 (0-0) | 0 (0-0) | 0 (0-0) | 0 (0-0) |
| Tubulointerstitial nephritis    | 0 (0-0) | 1 (0-0) | 0 (0-0) | 0 (0-0) | 0 (0-0) | 1 (0-0) | 0 (0-0) | 0 (0-0) |
| Tumour pain                     | 0 (0-0) | 1 (0-0) | 0 (0-0) | 0 (0-0) | 0 (0-0) | 0 (0-0) | 0 (0-0) | 0 (0-0) |
| Uveitis                         | 0 (0-0) | 1 (0-0) | 0 (0-0) | 0 (0-0) | 0 (0-0) | 0 (0-0) | 0 (0-0) | 0 (0-0) |
| Venous thrombosis limb          | 0 (0-0) | 1 (0-0) | 0 (0-0) | 0 (0-0) | 0 (0-0) | 0 (0-0) | 0 (0-0) | 0 (0-0) |
| Ventricular fibrillation        | 0 (0-0) | 0 (0-0) | 0 (0-0) | 1 (0-0) | 0 (0-0) | 0 (0-0) | 0 (0-0) | 0 (0-0) |
| Vestibular disorder             | 0 (0-0) | 1 (0-0) | 0 (0-0) | 0 (0-0) | 0 (0-0) | 0 (0-0) | 0 (0-0) | 0 (0-0) |
| Wound necrosis                  | 0 (0-0) | 1 (0-0) | 0 (0-0) | 0 (0-0) | 0 (0-0) | 0 (0-0) | 0 (0-0) | 0 (0-0) |

Abbreviations: ET=endocrine therapy; n=number of patients; N=number of patients in population; TEAE=treatment-emergent adverse event.

**Table A5. Treatment-emergent serious adverse events\***

| SOC, PT, n (%) (≥5% in any arm)                             | Abemaciclib+ ET<br>N = 2791, n (%) | ET alone<br>N = 2800, n (%) |
|-------------------------------------------------------------|------------------------------------|-----------------------------|
| <b>Patients with ≥1 serious adverse event</b>               | 433 (15.5)                         | 256 (9.1)                   |
| <b>Infections and infestations</b>                          | 148 (5.3)                          | 81 (2.9)                    |
| Pneumonia                                                   | 28 (1.0)                           | 17 (0.6)                    |
| Cellulitis                                                  | 14 (0.5)                           | 11 (0.4)                    |
| Urinary tract infection                                     | 14 (0.5)                           | 4 (0.1)                     |
| Influenza                                                   | 7 (0.3)                            | 4 (0.1)                     |
| Sepsis                                                      | 6 (0.2)                            | 2 (0.1)                     |
| Upper respiratory tract infection                           | 6 (0.2)                            | 0                           |
| Erysipelas                                                  | 6 (0.2)                            | 0                           |
| Breast cellulitis                                           | 5 (0.2)                            | 5 (0.2)                     |
| <b>Gastrointestinal disorders</b>                           | 59 (2.1)                           | 17 (0.6)                    |
| Diarrhea                                                    | 15 (0.5)                           | 0                           |
| Abdominal pain                                              | 6 (0.2)                            | 1 (<0.1)                    |
| Pancreatitis                                                | 6 (0.2)                            | 2 (0.1)                     |
| Colitis                                                     | 5 (0.2)                            | 3 (0.1)                     |
| <b>Respiratory, thoracic, and mediastinal disorders</b>     | 38 (1.4)                           | 10 (0.4)                    |
| Pneumonitis                                                 | 8 (0.3)                            | 0                           |
| <b>Vascular disorders</b>                                   | 31 (1.1)                           | 12 (0.4)                    |
| Lymphoedema                                                 | 7 (0.3)                            | 3 (0.1)                     |
| <b>General disorders and administration site conditions</b> | 27 (1.0)                           | 10 (0.4)                    |
| Pyrexia                                                     | 10 (0.4)                           | 0                           |
| <b>Cardiac disorders</b>                                    | 26 (0.9)                           | 15 (0.5)                    |
| Atrial fibrillation                                         | 8 (0.3)                            | 1 (<0.1)                    |
| <b>Blood and lymphatic disorders</b>                        | 25 (0.9)                           | 5 (0.2)                     |
| Anemia                                                      | 9 (0.3)                            | 2 (0.1)                     |
| Febrile neutropenia                                         | 5 (0.2)                            | 1 (<0.1)                    |
| <b>Hepatobiliary disorders</b>                              | 24 (0.9)                           | 9 (0.3)                     |
| Cholecystitis                                               | 10 (0.4)                           | 4 (0.1)                     |
| <b>Metabolism and nutrition disorders</b>                   | 18 (0.6)                           | 8 (0.3)                     |
| Dehydration                                                 | 7 (0.3)                            | 0                           |
| <b>Composite terms</b>                                      |                                    |                             |
| <i>Venous thromboembolic event (VTE)<sup>a</sup></i>        | 34 (1.2)                           | 9 (0.3)                     |
| <i>Pulmonary embolism<sup>b</sup></i>                       | 19 (0.7)                           | 4 (0.1)                     |
| <i>Interstitial lung disease (ILD)<sup>c</sup></i>          | 14 (0.5)                           | 1 (<0.1)                    |
| <i>Increased transaminases<sup>d</sup></i>                  | 11 (0.4)                           | 2 (0.1)                     |

<sup>a</sup>VTE is a composite term including the following preferred terms: catheter site thrombosis, cerebral vein thrombosis, cerebral venous thrombosis, deep vein thrombosis, device related thrombosis, embolism, hepatic vein thrombosis, jugular vein occlusion, jugular vein thrombosis, ovarian vein thrombosis, portal vein thrombosis, pulmonary embolism, subclavian vein thrombosis, and venous thrombosis limb

<sup>b</sup>PE is a composite term: embolism and pulmonary embolism; minimum severity grade per CTCAE for PE is Grade 3 for uncomplicated events

<sup>c</sup>ILD is a composite term including the following preferred terms: interstitial lung disease, lung opacity, pneumonitis, pulmonary fibrosis, radiation fibrosis - lung, radiation pneumonitis, sarcoidosis, organizing pneumonia, pulmonary granuloma, and sarcoidosis. There was one fatality due to ILD (pneumonitis) in the abemaciclib arm and none in the control arm

<sup>d</sup>Increased transaminases is a composite term including the following preferred terms: alanine aminotransferase (ALT) increased, aspartate aminotransferase (AST) increased, transaminases increased, hepatic function abnormal, hepatic enzyme abnormal, hepatic enzyme increased, drug-induced injury, liver function test increased, hepatotoxicity, hypertransaminasemia, liver function test abnormal, and hepatic enzyme abnormal (2)

\*Treatment-emergent serious adverse events are reported as events that first occurred or worsened in severity while on therapy and within 30 days after treatment discontinuation, or serious events which occurred beyond 30 days after treatment discontinuation and were considered related to study treatment by the investigator.

Abbreviations: AE=adverse event; ET=endocrine therapy; G=grade; n=number of patients; N=number of patients in population; PT=preferred term; SAE=serious adverse event; SOC=system organ class.

**Table A6. Summary of deaths due to adverse events by preferred terms**

|                                                                                                        | <b>Abemaciclib + ET<br/>N = 2791, n (%)</b> | <b>Abemaciclib + ET<br/>N = 2800, n (%)</b> |
|--------------------------------------------------------------------------------------------------------|---------------------------------------------|---------------------------------------------|
| <b>Adverse events leading to deaths on therapy or ≤30 days from discontinuation of study treatment</b> | 15 (0.5)                                    | 11 (0.4)                                    |
| Acute kidney injury                                                                                    | 0 (0)                                       | 1 (0)                                       |
| COVID19 pneumonia                                                                                      | 1 (0)                                       | 1 (0)                                       |
| Cardiac arrest                                                                                         | 1 (0)                                       | 0 (0)                                       |
| Cardiac failure                                                                                        | 2 (0.1)                                     | 0 (0)                                       |
| Cerebral haemorrhage                                                                                   | 1 (0)                                       | 0 (0)                                       |
| Cerebrovascular accident                                                                               | 1 (0)                                       | 0 (0)                                       |
| Death                                                                                                  | 0 (0)                                       | 1 (0)                                       |
| Diarrhoea                                                                                              | 1 (0)                                       | 0 (0)                                       |
| Gastrointestinal adenocarcinoma                                                                        | 0 (0)                                       | 1 (0)                                       |
| General physical health deterioration                                                                  | 1 (0)                                       | 0 (0)                                       |
| Hypoxia                                                                                                | 1 (0)                                       | 0 (0)                                       |
| Influenza                                                                                              | 0 (0)                                       | 1 (0)                                       |
| Mesenteric artery thrombosis                                                                           | 1 (0)                                       | 0 (0)                                       |
| Myocardial infarction                                                                                  | 1 (0)                                       | 0 (0)                                       |
| Pleural effusion                                                                                       | 0 (0)                                       | 1 (0)                                       |
| Pneumonia                                                                                              | 1 (0)                                       | 1 (0)                                       |
| Pneumonitis                                                                                            | 1 (0)                                       | 0 (0)                                       |
| Pulmonary embolism                                                                                     | 0 (0)                                       | 1 (0)                                       |
| Septic shock                                                                                           | 0 (0)                                       | 1 (0)                                       |
| Sudden death                                                                                           | 0 (0)                                       | 1 (0)                                       |
| Suspected COVID19                                                                                      | 1 (0)                                       | 0 (0)                                       |
| Urosepsis                                                                                              | 0 (0)                                       | 1 (0)                                       |
| Ventricular fibrillation                                                                               | 1 (0)                                       | 0 (0)                                       |
| <b>Adverse events leading to deaths occurring &gt;30 days from study treatment discontinuation</b>     | 24 (0.9)                                    | 23 (0.8)                                    |
| Abdominal infection                                                                                    | 0 (0)                                       | 1 (0)                                       |
| Acute kidney injury                                                                                    | 1 (0)                                       | 0 (0)                                       |
| COVID19                                                                                                | 3 (0.1)                                     | 2 (0.1)                                     |
| COVID19 pneumonia                                                                                      | 2 (0.1)                                     | 0 (0)                                       |
| Cardiac failure                                                                                        | 0 (0)                                       | 1 (0)                                       |
| Cardiorespiratory arrest                                                                               | 1 (0)                                       | 0 (0)                                       |
| Cardiogenic shock                                                                                      | 0 (0)                                       | 1 (0)                                       |
| Cervix carcinoma                                                                                       | 0 (0)                                       | 1 (0)                                       |
| Colon cancer                                                                                           | 1 (0)                                       | 0 (0)                                       |
| Colon cancer metastatic                                                                                | 1 (0)                                       | 0 (0)                                       |
| Completed suicide                                                                                      | 0 (0)                                       | 1 (0)                                       |
| Death                                                                                                  | 5 (0.2)                                     | 8 (0.3)                                     |
| Diverticular perforation                                                                               | 0 (0)                                       | 1 (0)                                       |

|                                         |         |       |
|-----------------------------------------|---------|-------|
| Malignant neoplasm of ampulla of Vater  | 0 (0)   | 1 (0) |
| Multiple organ dysfunction syndrome     | 0 (0)   | 1 (0) |
| Myelodysplastic syndrome                | 1 (0)   | 0 (0) |
| Myocardial infarction                   | 1 (0)   | 1 (0) |
| Pancreatic carcinoma                    | 0 (0)   | 1 (0) |
| Pneumonia                               | 1 (0)   | 1 (0) |
| Prosthetic valve endocarditis           | 1 (0)   | 0 (0) |
| Pulmonary embolism                      | 1 (0)   | 0 (0) |
| Pulmonary oedema                        | 1 (0)   | 0 (0) |
| Respiratory failure                     | 0 (0)   | 1 (0) |
| Sepsis                                  | 1 (0)   | 0 (0) |
| Subdural haematoma                      | 2 (0-1) | 0 (0) |
| Sudden death                            | 1 (0)   | 0 (0) |
| Systemic inflammatory response syndrome | 0 (0)   | 1 (0) |

Abbreviations: ET=endocrine therapy; n=number of patients; N=number of patients in population

**Table A7. Serious adverse events (SAEs) in long term follow-up regardless of causality at OS IA2**

| SOC with PT reported in $n \geq 3$ in any group             | Abemaciclib + ET<br>n (%) | ET alone<br>n (%) |
|-------------------------------------------------------------|---------------------------|-------------------|
| <b>Patients with post discontinuation follow-up data</b>    | <b>N = 2621</b>           | <b>N = 2636</b>   |
| <b>Patients with <math>\geq 1</math> SAE</b>                | 116 (4.4)                 | 142 (5.4)         |
| <b>Infections and infestations</b>                          | 29 (1.1)                  | 40 (1.5)          |
| COVID-19                                                    | 6 (0.2)                   | 6 (0.2)           |
| Cellulitis                                                  | 5 (0.2)                   | 5 (0.2)           |
| COVID-19 pneumonia                                          | 4 (0.2)                   | 4 (0.2)           |
| Pneumonia                                                   | 4 (0.2)                   | 5 (0.2)           |
| <b>Cardiac disorders</b>                                    | 14 (0.5)                  | 10 (0.4)          |
| Cardiac failure                                             | 3 (0.1)                   | 2 (0.1)           |
| Myocardial infarction                                       | 3 (0.1)                   | 3 (0.1)           |
| <b>Injury, poisoning and procedural complications</b>       | 14 (0.5)                  | 18 (0.7)          |
| Subdural haematoma                                          | 3 (0.1)                   | 1 (0.0)           |
| <b>Vascular disorders</b>                                   | 7 (0.3)                   | 8 (0.3)           |
| Lymphoedema                                                 | 5 (0.2)                   | 4 (0.2)           |
| <b>General disorders and administration site conditions</b> | 9 (0.3)                   | 14 (0.5)          |
| Death                                                       | 5 (0.2)                   | 8 (0.3)           |
| <b>Gastrointestinal disorders</b>                           | 9 (0.3)                   | 19 (0.7)          |
| Colitis                                                     | 0 (0.0)                   | 3 (0.1)           |
| <b>Blood and lymphatic disorders</b>                        | 3 (0.1)                   | 4 (0.2)           |
| Febrile neutropenia                                         | 0 (0.0)                   | 3 (0.1)           |
| <b>Renal and urinary disorders</b>                          | 4 (0.2)                   | 6 (0.2)           |
| Acute kidney injury                                         | 2 (0.1)                   | 3 (0.1)           |
| Nephrolithiasis                                             | 0 (0.0)                   | 3 (0.1)           |
| <b>Musculoskeletal and connective tissue disorders</b>      | 6 (0.2)                   | 10 (0.4)          |
| Osteoarthritis                                              | 1 (0.0)                   | 4 (0.2)           |

<sup>a</sup> Long term follow-up starts >30 days after treatment discontinuation

Abbreviations: ET=endocrine therapy; n=number of patients; N=number of patients; PT=preferred term; SOC=system organ class

Committee Members

| <b>monarchE Executive Committee</b> |                       |                                                                                            |
|-------------------------------------|-----------------------|--------------------------------------------------------------------------------------------|
| <b>Country</b>                      | <b>Name</b>           | <b>Affiliation</b>                                                                         |
| Germany                             | Nadia Harbeck         | Breast Center, Ludwig-Maximilians-Universität München (LMU), Munich                        |
| Japan                               | Masakazu Toi          | Kyoto University Hospital, Kyoto                                                           |
| Spain                               | Miguel Martin Jimenez | Hospital General Universitario Gregorio Marañón, Universidad Complutense, Ciberonc, Madrid |
| United Kingdom                      | Stephen Johnston      | Royal Marsden Hospital, London                                                             |
| United States                       | Joyce O'Shaughnessy   | Baylor University Medical Center, Texas Oncology, US Oncology, Dallas, TX                  |
| United States                       | Priya Rastogi         | University of Pittsburgh, NSABP Foundation, Pittsburgh, PA                                 |

| <b>monarchE Global Steering Committee</b> |                          |                                                                                                                          |
|-------------------------------------------|--------------------------|--------------------------------------------------------------------------------------------------------------------------|
| <b>Country</b>                            | <b>Name</b>              | <b>Affiliation</b>                                                                                                       |
| Australia                                 | Frances Boyle            | Patricia Ritchie Centre for Cancer Care and Research, Mater Hospital North Sydney, North Sydney                          |
| Austria                                   | Güenther G. Steger       | Medical University of Vienna, Vienna                                                                                     |
| Belgium                                   | Patrick Neven            | Universitaire Ziekenhuizen Leuven - Campus Gasthuisberg, Leuven                                                          |
| Brazil                                    | Laura Testa              | Instituto D'Or de Pesquisa e Ensino (IDOR), São Paulo                                                                    |
| China                                     | Zefei Jiang              | The Fifth Medical Center of PLA General Hospital, Beijing                                                                |
| China                                     | Zhimin Shao              | Fudan University Shanghai Cancer Center, Shanghai                                                                        |
| Denmark                                   | Michael Andersson        | Rigshospitalet, Copenhagen                                                                                               |
| France                                    | Mario Campone            | Institut de Cancérologie de l'Ouest Pays de la Loire Saint-Herblain-Angers, Saint-Herblain                               |
| Germany                                   | Nadia Harbeck            | Breast Center, Ludwig-Maximilians-Universität München (LMU), Munich                                                      |
| Germany                                   | Jens Huober              | Cantonal Hospital St. Gallen, Breast Center; Department of Interdisciplinary Medical Services, CH-9007 St. Gallen        |
| Italy                                     | Valentina Guarneri       | Department of Surgery, Oncology and Gastroenterology, University of Padova; Istituto Oncológico Veneto IOV IRCCS, Padova |
| Italy                                     | Lucia Del Mastro         | Breast Unit, IRCCS Ospedale Policlinico, Università di Genova, Genova                                                    |
| Japan                                     | Chikako Shimizu          | National Center for Global Health and Medicine, Tokyo                                                                    |
| Japan                                     | Kenji Tamura             | National Cancer Center Hospital, Tokyo                                                                                   |
| Japan                                     | Masakazu Toi             | Kyoto University Hospital, Kyoto                                                                                         |
| Korea                                     | Joohyuk Sohn             | Yonsei Cancer Center, Seoul                                                                                              |
| Mexico                                    | Georgina Garnica Jaliffe | Grupo Medico Camino S.C., Mexico City                                                                                    |
| Poland                                    | Elzbieta Senkus          | Department of Oncology & Radiotherapy Medical University of Gdańsk, Gdańsk                                               |
| Russia                                    | Alexey Tryakin           | N.N.Blokhin Russian Cancer Research Center, Moscow                                                                       |
| Spain                                     | Javier Cortés            | IOB institute of Oncology, Quiron Group, Madrid & Barcelona & Vall d'Hebron Institute of Oncology, Barcelona             |
| Spain                                     | Miguel Martin            | Hospital General Universitario Gregorio Marañón, Universidad Complutense, Ciberonc, Madrid                               |
| Taiwan                                    | Chiun-Sheng Huang        | National Taiwan University Hospital, Taipei                                                                              |
| Turkey                                    | Irfan Cicin              | Trakya University Faculty of Medicine, Edirne                                                                            |
| United Kingdom                            | Stephen Johnston         | Royal Marsden Hospital, London                                                                                           |

|                |                     |                                                                                                                                                                                                                                                                                              |
|----------------|---------------------|----------------------------------------------------------------------------------------------------------------------------------------------------------------------------------------------------------------------------------------------------------------------------------------------|
| United Kingdom | Andrew Wardley      | NIHR Manchester Clinical Research Facility at The Christie, Manchester Academic Health Science Centre & Manchester Cancer Research Centre, Manchester<br>Division of Cancer Sciences, School of Medical Sciences, Faculty of Biology Medicine & Health, University of Manchester, Manchester |
| United States  | Matthew P. Goetz    | Mayo Clinic, Rochester, MN                                                                                                                                                                                                                                                                   |
| United States  | Erika Hamilton      | Sarah Cannon Research Institute/Tennessee Oncology, Nashville, TN                                                                                                                                                                                                                            |
| United States  | Joyce O'Shaughnessy | Baylor University Medical Center, Texas Oncology, US Oncology, Dallas, TX                                                                                                                                                                                                                    |
| United States  | Priya Rastogi       | University of Pittsburgh, NSABP Foundation, Pittsburgh, PA                                                                                                                                                                                                                                   |
| United States  | Hope S. Rugo        | University of California San Francisco, CA                                                                                                                                                                                                                                                   |
| United States  | Sara M. Tolaney     | Dana-Farber Cancer Institute, Boston, MA                                                                                                                                                                                                                                                     |

### Regional Steering Committee

| Country      | Name                     | Affiliation                                                                  |
|--------------|--------------------------|------------------------------------------------------------------------------|
| Argentina    | Gonzalo Gomez Abuin      | Hospital Aleman, Buenos Aires                                                |
| Argentina    | José Zarba               | Centro Medico San Roque, Tucuman                                             |
| Australia    | Elgene Lim               | St Vincent's Hospital, Darlinghurst                                          |
| Brazil       | Patricia Santi           | CEPHO – Faculdade de Medicina do ABC, São Paulo                              |
| Brazil       | Roberto Hegg             | Clin. Pesq.e Centro Estudos Oncologia Ginecológica e Mamária, São Paulo      |
| China        | Ning Liao                | Guangdong Provincial People's Hospital, Guangzhou                            |
| Denmark      | Buris Christiansen       | Nordsjaellands Hospital, Hillerød                                            |
| Finland      | Natalja Eigeliene        | University of Turku, Turku                                                   |
| France       | Jerome Martin-Babau      | Hôpital Privé des Côtes d'Armor- HPCA, Plérin                                |
| Germany      | Johannes Ettl            | Klinikum rechts der Isar, Technical University of Munich, Munich             |
| Greece       | Dimitrios Mavroudis      | University General Hospital of Heraklion, Heraklion                          |
| Hong Kong    | Joanne Chiu              | Queen Mary Hospital, Pok Fu Lam                                              |
| Hungary      | Katalin Boer             | Szent Margit Hospital Department of Medical Oncology, Budapest               |
| India        | Rajnish Nagarkar         | HCG Manavata Cancer Centre, Nashik                                           |
| Israel       | Shani Paluch-Shimon      | Shaare Zedek Medical Center, Jerusalem                                       |
| Italy        | Luca Moscetti            | Central Hospital of Belcolle, Viterbo VT                                     |
| Japan        | Yasuaki Sagara           | Sagara Hospital, Kagoshima                                                   |
| Korea        | Sung-Bae Kim             | Asan Medical Center, University of Ulsan College of Medicine, Seoul          |
| Mexico       | Manuel Magallanes Maciel | COI Centro Oncológico Internacional S.A.P.I de C.V., Mexico City             |
| Netherlands  | Vivianne Tjan-Heijnen    | Universitair Medisch Centrum Maastricht, Maastricht                          |
| New Zealand  | Reuben Broom             | Auckland City Hospital, Auckland                                             |
| Poland       | Aleksandra Lacko         | Dolnoslaskie Centrum Onkologii, Wroclawski Uniwersytet Medyczny, Wroclaw     |
| Romania      | Michael Schenker         | Centrul de Oncologie Sf. Nectarie SRL, Craiova                               |
| Russia       | Nikita Volkov            | St-Petersburg scientific practical center spec medical care, Saint-Peterburg |
| Singapore    | Yoon Sim Yap             | National Cancer Centre Singapore                                             |
| South Africa | Maria Coccia-Portugal    | Eastleigh Breast Care Center, Pretoria                                       |
| Spain        | José Ángel García Sáenz  | Hospital Clínico San Carlos, Madrid                                          |
| Sweden       | Anne Andersson           | Norrlands Universitetssjukhus, Umeå                                          |
| Taiwan       | Tsu-Yi Chao              | Taipei Medical University Shuang Ho Hospital, New Taipei                     |
| Turkey       | Erhan Gokmen             | Ege University Faculty of Medicine, İzmir                                    |

|               |                    |                                                                      |
|---------------|--------------------|----------------------------------------------------------------------|
| Turkey        | Hakan Harputluoglu | Inonu University Medical Faculty, Malatya                            |
| Ukraine       | Oleksandr Berzoy   | Odesa Regional Clinical Hospital, Odesa                              |
| United States | Debra Patt         | Texas Oncology - Austin, TX                                          |
| United States | Heather McArthur   | Cedars Sinai Medical Center, Los Angeles, CA                         |
| United States | Helen Chew         | University of California, Davis - Health Systems, Sacramento, CA     |
| United States | Pavani Chalasani   | The University of Arizona Cancer Center, Tucson, AZ                  |
| United States | Peter Kaufman      | University of Vermont Medical Center, Burlington, VT                 |
| United States | Karen Tedesco      | New York Oncology Hematology-Patroun Creek, New York                 |
| United States | Stephanie L. Graff | Sarah Cannon Cancer Institute at HCA Midwest Health, Kansas City, MO |



*monarchE Site Investigator List*

| Site ID | Country            | Last Name          | First Name   | Patient Enrollment | Institution/Hospital/Department                                                            |
|---------|--------------------|--------------------|--------------|--------------------|--------------------------------------------------------------------------------------------|
| 449     | Brazil             | Hegg               | Roberto      | 69                 | Clínica de Pesquisas e Centro de Estudos em Oncologia Ginecológica e Mamária Ltda          |
| 872     | China              | Zhang              | Qingyuan     | 59                 | Harbin Medical University Cancer Hospital                                                  |
| 865     | China              | Shen               | Kunwei       | 54                 | Shanghai Jiaotong University School of Medicine Ruijin Hospital                            |
| 545     | Mexico             | Martinez Rodriguez | Jorge Luis   | 43                 | Christus Muguerza Clinica Vidriera (Christus Muguerza Sistemas Hospitalarios S.A. de C.V.) |
| 870     | China              | Song               | Chuangui     | 43                 | Fujian Medical University Union Hospital_Do not use – Duplicate facility                   |
| 868     | China              | Ouyang             | Quchang      | 40                 | Hunan Cancer Hospital                                                                      |
| 598     | Korea, Republic of | Im                 | Young-Hyuck  | 39                 | Samsung Medical Center                                                                     |
| 215     | Germany            | Reinisch           | Mattea       | 35                 | Kliniken Essen-Mitte, Evangelische HuysSENS-Stiftung                                       |
| 861     | China              | Shao               | Zhimin       | 35                 | Fudan University Shanghai Cancer Center                                                    |
| 179     | France             | Campone            | Mario        | 34                 | Institut de Cancérologie de l'Ouest Centre René Gauducheau                                 |
| 231     | Greece             | Zagouri            | Flora        | 34                 | Alexandra General Hospital of Athens                                                       |
| 396     | United Kingdom     | Johnston           | Stephen      | 34                 | Royal Marsden Hospital                                                                     |
| 591     | Korea, Republic of | Kim                | Sung-Bae     | 34                 | Asan Medical Center                                                                        |
| 317     | Romania            | Grecea             | Daniela      | 33                 | Institutul Oncologic                                                                       |
| 236     | Greece             | Papazisis          | Konstantinos | 32                 | Euromedica - General Clinic of Thessaloniki                                                |

|     |                       |                         |               |    |                                                                                                        |
|-----|-----------------------|-------------------------|---------------|----|--------------------------------------------------------------------------------------------------------|
| 302 | Poland                | Lacko                   | Aleksandra    | 31 | Dolnośląskie Centrum Onkologii, Pulmonologii i Hematologii                                             |
| 599 | Korea,<br>Republic of | Sohn                    | Joo Hyuk      | 31 | Severance Hospital, Yonsei University Health System                                                    |
| 864 | China                 | Liu                     | Zhenzhen      | 31 | Henan Cancer Hospital                                                                                  |
| 264 | Italy                 | Guarneri                | Valentina     | 30 | Istituto Oncologico Veneto IRCCS                                                                       |
| 329 | Spain                 | Garcia Saenz            | Jose          | 30 | Hospital Clinico San Carlos                                                                            |
| 387 | Ukraine               | Adamchuk                | Hryhoriy      | 30 | MI Kryvyi Rih Oncology Dispensary of Dnipropetrovsk Regional Council;<br>Chemotherapy Department       |
| 845 | Japan                 | Okada                   | Morihito      | 30 | Hiroshima University Hospital                                                                          |
| 315 | Romania               | Schenker                | Michael       | 29 | Centrul de Oncologie "Sfântul Nectarie"                                                                |
| 318 | Romania               | Median                  | Mircea Dragos | 28 | Spitalul Clinic Filantropia                                                                            |
| 653 | United States         | Fonseca                 | Gustavo       | 28 | Sarah Cannon Research Institute SCRI                                                                   |
| 800 | New Zealand           | Broom                   | Reuben        | 28 | Auckland City Hospital                                                                                 |
| 602 | Korea,<br>Republic of | Seo                     | Jae Hong      | 27 | Korea University Guro Hospital                                                                         |
| 164 | Finland               | Kellokumpu-<br>Lehtinen | Pirkko-Liisa  | 26 | Tampereen yliopistollinen sairaala                                                                     |
| 373 | Turkey                | Oksuzoglu               | Berna         | 26 | Abdurrahman Yurtaslan Ankara Oncology, education and Research Hospital                                 |
| 388 | Ukraine               | Shevnia                 | Serhii        | 26 | Communal Noncommercial Enterprise "Podillia Regional Oncology Center Of<br>Vinnytsia Regional Council" |
| 441 | Brazil                | Freire Marconato        | Heloisa       | 26 | Hospital de Cancer de Londrina                                                                         |
| 522 | Taiwan                | Chung                   | Chi-Feng      | 26 | Sun Yat-Sen Cancer Center                                                                              |

|     |                    |                 |              |    |                                                                  |
|-----|--------------------|-----------------|--------------|----|------------------------------------------------------------------|
| 596 | Korea, Republic of | Kim             | Jee Hyun     | 26 | Seoul National University Bundang Hospital                       |
| 757 | United States      | Gandhi          | Mitul        | 26 | Virginia Cancer Specialists                                      |
| 368 | Turkey             | Ozyilkan        | Ozgur        | 25 | Baskent University Dr. Turgut Noyan Research and Training Center |
| 372 | Turkey             | Gumus           | Mahmut       | 25 | Göztepe Professor Dr. Süleyman Yalçın City Hospital              |
| 205 | Germany            | Lueck           | Hans-Joachim | 24 | Gynäkologisch-Onkologische Praxis am Pelikanplatz                |
| 421 | Argentina          | Puig            | Juan         | 24 | Centro Polivalente de Asistencia e Inv. Clinica CER-San Juan     |
| 531 | Mexico             | Reyes Contreras | Jessica      | 24 | ONCOLOGICO POTOSINO, S.C.                                        |
| 136 | Belgium            | Neven           | Patrick      | 23 | Universitaire Ziekenhuizen Leuven - Campus Gasthuisberg          |
| 183 | France             | Dobi            | Erion        | 23 | CHU de Besancon Hopital Jean Minjoz                              |
| 348 | Spain              | Fernandez Abad  | Maria        | 23 | Hospital Universitario Ramón y Cajal                             |
| 570 | Australia          | Boyle           | Frances      | 23 | Mater Hospital Sydney                                            |
| 822 | Japan              | Yamashita       | Toshinari    | 23 | Kanagawa cancer center                                           |
| 219 | Germany            | Fasching        | Peter        | 22 | Universitätsklinikum Erlangen                                    |
| 344 | Spain              | Lopez Barajas   | Isabel       | 22 | Hospital Universitario San Cecilio                               |
| 375 | Turkey             | Arslan          | Cagatay      | 22 | İzmir Medical Point                                              |
| 407 | United Kingdom     | Karapanagiotou  | Eleni        | 22 | Guys/St. Thomas Hospital                                         |
| 622 | Russian Federation | Krivorotko      | Petr         | 22 | FGU Research Institution of Oncology                             |
| 686 | United States      | Dakhil          | Shaker       | 22 | Cancer Center of Kansas                                          |
| 690 | United States      | Vuky            | Jacqueline   | 22 | OHSU Center for Health and Healing                               |

|     |                |                     |             |    |                                                       |
|-----|----------------|---------------------|-------------|----|-------------------------------------------------------|
| 337 | Spain          | Cruz Jurado         | Josefina    | 21 | hospital universitario de canarias                    |
| 370 | Turkey         | Aksoy               | Sercan      | 21 | Hacettepe University Faculty of Medicine              |
| 371 | Turkey         | Harputluoglu        | Hakan       | 21 | Inonu Universitesi Turgut Ozal Tıp Merkezi            |
| 444 | Brazil         | Sant´Ana            | Rosane      | 21 | Instituto do Cancer do Ceara                          |
| 519 | Taiwan         | Huang               | Chiun-Sheng | 21 | National Taiwan University Hospital                   |
| 866 | China          | Liu                 | Qiang       | 21 | Sun Yat-sen Memorial Hospital, Sun Yat-sen University |
| 209 | Germany        | Janni               | Wolfgang    | 20 | Universitätsklinikum Ulm                              |
| 367 | Turkey         | Sezgin Goksu        | Sema        | 20 | Akdeniz University Medical Faculty                    |
| 411 | United Kingdom | Howell              | Sacha       | 20 | The Christie NHS Foundation Trust                     |
| 495 | India          | Nagarkar            | Rajnish     | 20 | HCG Manavata Cancer Centre                            |
| 502 | Israel         | Gal-Yam             | Einav       | 20 | Sheba Medical Center                                  |
| 536 | Mexico         | Hernandez Hernandez | Carlos      | 20 | Oaxaca Site Management Organization                   |
| 571 | Australia      | Sanmugarajah        | Jasotha     | 20 | Gold Coast University Hospital                        |
| 574 | Australia      | Beith               | Jane        | 20 | Chris O'Brien Lifehouse                               |
| 577 | Australia      | Shannon             | Catherine   | 20 | Mater Adult Hospital Brisbane                         |
| 654 | United States  | Reeves Jr           | James       | 20 | Sarah Cannon Research Institute SCRI                  |
| 176 | France         | Toledano            | Ivan        | 19 | Centre de Cancérologie du Grand Montpellier           |
| 203 | Germany        | Zaiss               | Matthias    | 19 | Praxis für interdisziplinäre Onkologie & Hämatologie  |
| 374 | Turkey         | Gokmen              | Erhan       | 19 | Ege University Medicine of Faculty                    |
| 533 | Mexico         | Garnica Jaliffe     | Georgina    | 19 | GRUPO MEDICO CAMINO SC                                |

|     |                    |                 |                 |    |                                                                 |
|-----|--------------------|-----------------|-----------------|----|-----------------------------------------------------------------|
| 581 | Australia          | Okera           | Meena           | 19 | Ashford Cancer Centre Research                                  |
| 620 | Russian Federation | Manikhas        | Alexey          | 19 | Saint-Petersburg City Clinical Oncology Dispensary              |
| 798 | Portugal           | Abreu           | Miguel          | 19 | IPOFG - Porto                                                   |
| 824 | Japan              | Takahashi       | Masato          | 19 | National Hospital Organization Hokkaido Cancer Center           |
| 100 | Denmark            | Nielsen         | Dorte           | 18 | Herlev and Gentofte Hospital                                    |
| 211 | Germany            | Hilpert         | Felix           | 18 | Mammazentrum HH - Krankenhaus Jerusalem                         |
| 440 | Brazil             | Santi           | Patricia        | 18 | Faculdade de Medicina do ABC                                    |
| 442 | Brazil             | Barrios         | Carlos Henrique | 18 | Hospital São Lucas da PUCRS                                     |
| 446 | Brazil             | Maia Vianna     | Karina          | 18 | Centro Integrado de Oncologia de Curitiba                       |
| 572 | Australia          | Tsoi            | Daphne          | 18 | St. John of God Subiaco Hospital                                |
| 626 | Russian Federation | Kovalenko       | Nadezhda        | 18 | Volgograd Regional Clinical Cancer Clinic No.1                  |
| 670 | United States      | McIntyre        | Kristi          | 18 | Texas Oncology - Dallas Presbyterian Hospital                   |
| 811 | Singapore          | Lee             | Soo-Chin        | 18 | National University Hospital                                    |
| 820 | Japan              | Inoue           | Kenichi         | 18 | Saitama Prefectural Cancer Center                               |
| 106 | Denmark            | Linnet          | Soren           | 17 | Regionshospitalet Gødstrup                                      |
| 138 | Belgium            | Poncin          | Renaud          | 17 | Clinique Saint Pierre Ottignies                                 |
| 190 | France             | Le Du           | Fanny           | 17 | Centre Eugène Marquis Rennes - Centre de Lutte Contre le Cancer |
| 233 | Greece             | Kalofonos       | Haralabos       | 17 | UNIVERSITY HOSPITAL OF PATRAS                                   |
| 325 | Spain              | Morales Murillo | Serafin         | 17 | Hospital Universitari Arnau de Vilanova                         |
| 546 | Mexico             | Ramirez Godinez | Francisco       | 17 | Hospital Civil Fray Antonio Alcalde                             |

|     |                    |             |           |    |                                                                                      |
|-----|--------------------|-------------|-----------|----|--------------------------------------------------------------------------------------|
| 588 | Australia          | Chan        | Arlene    | 17 | Breast Cancer Research Centre-WA                                                     |
| 632 | Russian Federation | Tryakin     | Alexey    | 17 | Russian Oncological Research Center                                                  |
| 104 | Denmark            | Nielsen     | Hanne     | 16 | Aarhus Universitetshospital, Aarhus Sygehus                                          |
| 161 | Finland            | Jekunen     | Antti     | 16 | Vaasan Keskussairaala                                                                |
| 177 | France             | Grenier     | Julien    | 16 | Institut Sainte Catherine                                                            |
| 305 | Poland             | Nowecki     | Zbigniew  | 16 | Narodowy Instytut Onkologii im. Marii Skłodowskiej-Curie Panstwowy Instytut Badawczy |
| 365 | Turkey             | Cicin       | Irfan     | 16 | Trakya University                                                                    |
| 518 | Taiwan             | Chen        | Shin-Cheh | 16 | Chang Gung Memorial Hospital - Linkou                                                |
| 652 | United States      | Hamilton    | Erika     | 16 | Sarah Cannon Research Institute SCRI                                                 |
| 827 | Japan              | Tokunaga    | Eriko     | 16 | National Hospital Organization Kyushu Cancer Center                                  |
| 873 | China              | Feng        | Jifeng    | 16 | Jiangsu Cancer Hospital                                                              |
| 924 | United States      | Abraham     | Jame      | 16 | Cleveland Clinic Foundation                                                          |
| 937 | United States      | Khong       | Hung      | 16 | H Lee Moffitt Cancer Center                                                          |
| 180 | France             | Desmoulins  | Isabelle  | 15 | Centre Georges François Leclerc                                                      |
| 252 | Hungary            | Horvath     | Zsolt     | 15 | Bacs-Kiskun Megyei Korhaz                                                            |
| 397 | United Kingdom     | Thandar     | Hasina    | 15 | Royal Surrey County Hospital                                                         |
| 401 | United Kingdom     | Oikonomidou | Olga      | 15 | Western General Hospital                                                             |
| 402 | United Kingdom     | Levitt      | Nicola    | 15 | Churchill Hospital                                                                   |

|     |                       |                 |              |    |                                                                      |
|-----|-----------------------|-----------------|--------------|----|----------------------------------------------------------------------|
| 447 | Brazil                | de Andrade      | Jurandyr     | 15 | Hospital das Clinicas da FMRP                                        |
| 448 | Brazil                | Costa           | Romulo       | 15 | ICESP - INSTITUTO DO CÂNCER DO ESTADO DE SÃO PAULO                   |
| 450 | Brazil                | Padua Souza     | Cristiano    | 15 | Fundação Pio XII - Hospital de Câncer de Barretos                    |
| 504 | Israel                | Kuchuk          | Iryna        | 15 | Meir Medical Center                                                  |
| 547 | Mexico                | Quintero Solis  | Rosario      | 15 | COI Centro Oncológico Internacional S.A.P.I de C.V.                  |
| 595 | Korea,<br>Republic of | Sim             | Sung Hoon    | 15 | National Cancer Center                                               |
| 821 | Japan                 | Ito             | Yoshinori    | 15 | Japanese Foundation for Cancer Research                              |
| 874 | China                 | Tang            | Jinhai       | 15 | Jiangsu Province Hospital                                            |
| 165 | Finland               | Rasi            | Karolina     | 14 | Oulu University Hospital - Oncology                                  |
| 178 | France                | Bourgeois       | Hugues       | 14 | Clinique Victor Hugo - Centre Jean Bernard                           |
| 300 | Poland                | Radecka         | Barbara      | 14 | Opolskie Centrum Onkologii w Opolu im. prof. Tadeusza Koszarowskiego |
| 369 | Turkey                | Cabuk           | Devrim       | 14 | Kocaeli University Medical Faculty Hospital                          |
| 486 | India                 | Jain            | Minish       | 14 | Ruby Hall Clinic and Grant Medical Foundation                        |
| 530 | Mexico                | Sanchez Guillen | Jorge Martin | 14 | CRI Centro Regiomontano de Investigacion S.C.                        |
| 541 | Mexico                | Palma Valle     | Ivette       | 14 | Neurociencias Estudios Clinicos                                      |
| 590 | Korea,<br>Republic of | Im              | Seock-Ah     | 14 | Seoul National University Hospital                                   |
| 656 | United States         | Block           | Margaret     | 14 | Oncology Hematology West                                             |
| 810 | Singapore             | Yap             | Yoon Sim     | 14 | National Cancer Centre Singapore                                     |
| 826 | Japan                 | Yasojima        | Hiroyuki     | 14 | National Hospital Organization Osaka National Hospital               |
| 836 | Japan                 | Saito           | Mitsue       | 14 | Juntendo University Hospital                                         |

|     |                    |               |            |    |                                                              |
|-----|--------------------|---------------|------------|----|--------------------------------------------------------------|
| 135 | Belgium            | Mebis         | Jeroen     | 13 | Jessa Ziekenhuis                                             |
| 186 | France             | Deiana        | Laura      | 13 | CHRU de Brest - Hôpital Morvan                               |
| 224 | Germany            | Park-Simon    | Tjoung-Won | 13 | Medizinische Hochschule Hanover                              |
| 334 | Spain              | Racca         | Fabricio   | 13 | Hospital Quirón Salud Barcelona-Instituto Oncológico Baselga |
| 343 | Spain              | BARNADAS      | AGUSTÍ     | 13 | Hospital de la Santa Creu i Sant Pau                         |
| 406 | United Kingdom     | Crook         | Timothy    | 13 | Sarah Cannon Research Institute UK                           |
| 430 | Argentina          | Zarba         | Juan Jose  | 13 | Centro Medico San Roque                                      |
| 431 | Argentina          | Lerzo         | Guillermo  | 13 | Fundacion CENIT para la Investigacion en Neurociencias       |
| 582 | Australia          | Lim           | Elgene     | 13 | St Vincent's Hospital Sydney                                 |
| 601 | Korea, Republic of | Lee           | Moon Hee   | 13 | Inha University Hospital                                     |
| 611 | Hong Kong          | Chiu          | Joanne WY  | 13 | Queen Mary Hospital                                          |
| 625 | Russian Federation | Mukhametshina | Guzel      | 13 | Kazan Oncology Dispensary                                    |
| 755 | United States      | Andersen      | Jay        | 13 | Northwest Cancer Specialists PC                              |
| 706 | United States      | Jankov        | Aleksandar | 13 | Baptist Cancer Center                                        |
| 829 | Japan              | Nakayama      | Takahiro   | 13 | Osaka International Cancer Institute                         |
| 833 | Japan              | Osako         | Tomofumi   | 13 | Kumamoto Shinto General Hospital                             |
| 847 | Japan              | Miyoshi       | Yasuo      | 13 | Hyogo College of Medicine                                    |
| 876 | China              | Jiang         | Zefei      | 13 | The Fifth Medical Center of PLA General Hospital             |
| 200 | Germany            | Ettl          | Johannes   | 12 | Klinikum Rechts der Isar der TU München                      |



|     |                    |                   |             |    |                                                                                                                       |
|-----|--------------------|-------------------|-------------|----|-----------------------------------------------------------------------------------------------------------------------|
| 230 | Greece             | Tryfonopoulos     | Dimitrios   | 12 | Agios Savvas Regional Cancer Hospital                                                                                 |
| 326 | Spain              | Martin Jimenez    | Miguel      | 12 | HOSPITAL GENERAL UNIVERSITARIO GREGORIO MARAÑON                                                                       |
| 332 | Spain              | Zamora Adelantado | Ester       | 12 | Hospital Universitari Vall d'Hebron                                                                                   |
| 341 | Spain              | Rojas Garcia      | Beatriz     | 12 | Hospital Madrid Norte Sanchinarro                                                                                     |
| 352 | Spain              | Alba Conejo       | Emilio      | 12 | Hospital Universitario Virgen de la Victoria                                                                          |
| 382 | Ukraine            | Bondarenko        | Igor        | 12 | Municipal Non-profit Enterprise "City Clinical Hospital #4" of Dnipro City Council, "Dnipro State Medical University" |
| 400 | United Kingdom     | Cleator           | Susan       | 12 | Charing Cross Hospital                                                                                                |
| 426 | Argentina          | Nervo             | Adrian      | 12 | Instituto Alexander Fleming                                                                                           |
| 452 | Brazil             | Crocamo           | Susanne     | 12 | INCA Hospital do Câncer III                                                                                           |
| 480 | India              | Manoharan         | Anoop       | 12 | Regional Cancer Centre                                                                                                |
| 521 | Taiwan             | Liu               | Chien-Liang | 12 | Mackay Memorial Hospital                                                                                              |
| 623 | Russian Federation | Osipov            | Mikhail     | 12 | SHBI "Leningrad Regional Clinical Oncology Dispensary n.a. L.D. Roman"                                                |
| 674 | United States      | OShaughnessy      | Joyce       | 12 | Texas Oncology-Baylor Charles A. Sammons Cancer Center                                                                |
| 747 | United States      | Tolaney           | Sara        | 12 | Dana-Farber Cancer Institute                                                                                          |
| 767 | United States      | Goetz             | Matthew     | 12 | Mayo Clinic                                                                                                           |
| 852 | Japan              | Nakamura          | Seigo       | 12 | Showa University Hospital                                                                                             |
| 105 | Denmark            | Glavicic          | Vesna       | 11 | Næstved Sygehus                                                                                                       |
| 108 | Denmark            | Cold              | Soren       | 11 | Odense Universitetshospital                                                                                           |
| 216 | Germany            | von Schumann      | Raquel      | 11 | Evangelisches Krankenhaus Bethesda Mönchengladbach                                                                    |

|     |               |                   |           |    |                                                                                             |
|-----|---------------|-------------------|-----------|----|---------------------------------------------------------------------------------------------|
| 232 | Greece        | Mavroudis         | Dimitrios | 11 | University General Hospital of Heraklion                                                    |
| 266 | Italy         | Mura              | Antonella | 11 | Ospedale Bellaria - Azienda USL di Bologna                                                  |
| 275 | Italy         | Omarini           | Claudia   | 11 | Azienda Ospedaliera Universitaria Policlinico de Modena                                     |
| 301 | Poland        | Sarosiek          | Tomasz    | 11 | Luxmed Onkologia sp. z o. o.                                                                |
| 304 | Poland        | Danielewicz       | Iwona     | 11 | Szpital Pomorskie Sp. z o. o.                                                               |
| 311 | Poland        | Prochowska        | Ewa       | 11 | Wielkopolskie Centrum Onkologii                                                             |
| 376 | Turkey        | Karadurmus        | Nuri      | 11 | University of Health Sciences, Gulhane School of Medicine                                   |
| 380 | Ukraine       | Sinielnikov       | Ivan      | 11 | Municipal Enterprise «Volyn Regional Medical Oncology Centre» of the Volyn Regional Council |
| 384 | Ukraine       | Hotko             | Yevhen    | 11 | Uzhgorod Central City Clinical Hospital                                                     |
| 425 | Argentina     | Fein              | Luis      | 11 | Instituto de Oncología de Rosario                                                           |
| 501 | Israel        | Peretz-Yablonski  | Tamar     | 11 | Hadassah Medical Center                                                                     |
| 542 | Mexico        | Magallanes Maciel | Manuel    | 11 | COI Centro Oncológico Internacional S.A.P.I de C.V.                                         |
| 730 | United States | Rugo              | Hope      | 11 | Univ of California San Francisco                                                            |
| 732 | United States | Chew              | Helen     | 11 | University of California, Davis - Health Systems                                            |
| 754 | United States | Wallmark          | John      | 11 | Maryland Oncology Hematology, P.A.                                                          |
| 832 | Japan         | Yoshida           | Atsushi   | 11 | St. Luke's International Hospital                                                           |
| 850 | Japan         | Osaki             | Akihiko   | 11 | Saitama Medical University International Medical Center                                     |
| 913 | United States | Suga              | Jennifer  | 11 | Kaiser Permanente                                                                           |
| 967 | United States | Brufsky           | Adam      | 11 | Univ of Pittsburgh Cancer Inst. (UPCI)                                                      |
| 118 | Austria       | Singer            | Christian | 10 | Medizinische Universität Wien Universitätsklinik für Frauenheilkunde                        |

|     |                |                 |           |    |                                                                  |
|-----|----------------|-----------------|-----------|----|------------------------------------------------------------------|
| 163 | Finland        | Alanko          | Tuomo     | 10 | Docrates Syöpäsairaala                                           |
| 245 | Hungary        | Landherr        | Laszlo    | 10 | Uzsoki Utcai Kórház                                              |
| 249 | Hungary        | Papai           | Zsuzsanna | 10 | Magyar Honvedseg Egeszsegugyi Kozpont                            |
| 309 | Poland         | Senkus-Konefka  | Elzbieta  | 10 | Uniwersyteckie Centrum Kliniczne                                 |
| 327 | Spain          | Anton Torres    | Antonio   | 10 | Hospital Universitario Miguel Servet                             |
| 331 | Spain          | Sanchez Rovira  | Pedro     | 10 | Complejo Hospitalario de Jaén                                    |
| 333 | Spain          | Llombart Cussac | Antonio   | 10 | Hospital Quirón Salud Valencia                                   |
| 381 | Ukraine        | Berzoy          | Oleksandr | 10 | Communal Enterprise "Odesa Regional Clinical Hospital"           |
| 403 | United Kingdom | Young           | Elaine    | 10 | Royal Preston Hospital                                           |
| 427 | Argentina      | Casarini        | Ignacio   | 10 | Instituto de Investigaciones Clínicas Mar del Plata              |
| 428 | Argentina      | Paz             | Gladys    | 10 | Centro de Oncología e Investigación de Buenos Aires              |
| 429 | Argentina      | Palazzo         | Felipe    | 10 | Centro Para la Atención Integral del Paciente Oncologico (CAIPO) |
| 456 | Brazil         | Strava Correa   | Tatiana   | 10 | Sirio-Libanés Brasilia - Centro de Oncologia - Asa Sul           |
| 525 | Taiwan         | Tseng           | Ling-Ming | 10 | Taipei Veterans General Hospital                                 |
| 540 | Mexico         | Tellez Bernal   | Eduardo   | 10 | Oncológica de Puebla S.A. de C.V.                                |
| 583 | Australia      | Ryan            | Connie    | 10 | The Townsville Hospital                                          |
| 685 | United States  | Peguero         | Julio     | 10 | Oncology Consultants Cancer Center                               |
| 687 | United States  | Beck            | Joseph    | 10 | Highlands Oncology Group                                         |
| 746 | United States  | Patt            | Debra     | 10 | Texas Oncology Cancer Center                                     |
| 758 | United States  | Paul            | Devchand  | 10 | Rocky Mountain Cancer Center                                     |

|     |             |              |           |    |                                                                 |
|-----|-------------|--------------|-----------|----|-----------------------------------------------------------------|
| 823 | Japan       | Sakuragi     | Masako    | 10 | Jichi Medical University Hospital                               |
| 825 | Japan       | Nishimura    | Seiichiro | 10 | Shizuoka Cancer Center                                          |
| 835 | Japan       | Sagara       | Yasuaki   | 10 | Sagara Hospital                                                 |
| 839 | Japan       | Yamamoto     | Naohito   | 10 | Chiba cancer center                                             |
| 965 | Canada      | Boudreau     | Dominique | 10 | CHU de Quebec-Hopital de Saint-Sacrement                        |
| 204 | Germany     | Grischke     | Eva-Maria | 9  | Universitätsklinikum Tübingen                                   |
| 206 | Germany     | Rogmans      | Gunther   | 9  | Zentrum fuer ambulante gynaekologische Onkologie (ZAGO)         |
| 213 | Germany     | Rautenberg   | Beate     | 9  | Universitaetsklinikum Freiburg                                  |
| 218 | Germany     | Heinrich     | Bernhard  | 9  | Gemeinschaftspraxis hop-augsburg                                |
| 225 | Germany     | Thill        | Marc      | 9  | Agaplesion Markus Krankenhaus                                   |
| 262 | Italy       | Musolino     | Antonino  | 9  | Azienda Ospedaliera Di Parma                                    |
| 287 | Netherlands | Tjan-Heijnen | Vivianne  | 9  | Maastricht UMC+                                                 |
| 316 | Romania     | Mazilu       | Laura     | 9  | Spitalul Clinic Judetean de Urgenta Sf.Apostol Andrei Constanta |
| 366 | Turkey      | Ozguroglu    | Mustafa   | 9  | Istanbul University                                             |
| 420 | Argentina   | Escudero     | Miguel    | 9  | Sanatorio Parque                                                |
| 422 | Argentina   | Kaen         | Diego     | 9  | Fundación CORI para la Investigación y Prevención del Cáncer    |
| 433 | Argentina   | Perfetti     | Aldo      | 9  | Clinica Adventista Belgrano                                     |
| 484 | India       | Deshmukh     | Chetan    | 9  | Deenanath Mangeshkar Hospital & Research Centre                 |
| 488 | India       | Mohapatra    | Prabrajya | 9  | Apollo Gleneagles Hospitals Kolkata                             |
| 490 | India       | Kapoor       | Rakesh    | 9  | Postgraduate Institute of Medical Education & Research          |
| 516 | Taiwan      | Hou          | Ming-Feng | 9  | Kaohsiung Medical University Chung-Ho Memorial Hospital         |

|     |                       |                |            |   |                                             |
|-----|-----------------------|----------------|------------|---|---------------------------------------------|
| 603 | Korea,<br>Republic of | Ahn            | Hee Kyung  | 9 | Gachon University Gil Medical Center        |
| 764 | United States         | Aponte         | Emmalind   | 9 | Texas Oncology - San Antonio Medical Center |
| 669 | United States         | Sander         | Aleksandra | 9 | Hematology Oncology Associates, PC          |
| 693 | United States         | Teplinsky      | Eleonora   | 9 | The Valley Hospital - Luckow Pavilion       |
| 801 | New Zealand           | Isaacs         | Richard    | 9 | Palmerston North Hospital                   |
| 831 | Japan                 | Ishikawa       | Takashi    | 9 | Tokyo Medical University Hospital           |
| 838 | Japan                 | Amari          | Masakazu   | 9 | KKR Tohoku Kosai Hospital                   |
| 844 | Japan                 | Ando           | Jiro       | 9 | Tochigi Cancer Center                       |
| 848 | Japan                 | Bando          | Hiroko     | 9 | University of tsukuba hospital              |
| 867 | China                 | Wang           | Xiaojia    | 9 | Zhejiang Cancer Hospital                    |
| 101 | Denmark               | Lundgaard Riis | Cathrine   | 8 | Vejle Sygehus                               |
| 102 | Denmark               | Andersson      | Michael    | 8 | Rigshospitalet                              |
| 103 | Denmark               | Lorincz        | Tamas      | 8 | Aalborg Universitets hospital               |
| 110 | Denmark               | Wedervang      | Kim        | 8 | Sygehus Soenderjylland                      |
| 115 | Austria               | Egle           | Daniel     | 8 | Universitätsklinik Innsbruck                |
| 117 | Austria               | Petru          | Edgar      | 8 | Universitätsklinikum Graz                   |
| 139 | Belgium               | Deleu          | Ines       | 8 | VITAZ                                       |
| 143 | Belgium               | Taylor         | Donatienne | 8 | CHU UCL Namur/Site Sainte Elisabeth         |
| 168 | Finland               | Auvinen        | Paivi      | 8 | Kuopio University Hospital                  |
| 175 | France                | Martin-Babau   | Jerome     | 8 | Hôpital Privé Des Côtes d'Armor             |

|     |                |                      |                |   |                                                                                       |
|-----|----------------|----------------------|----------------|---|---------------------------------------------------------------------------------------|
| 214 | Germany        | Tio                  | Joke           | 8 | Universitätsklinikum Münster                                                          |
| 223 | Germany        | Luedtke-Heckenkamp   | Kerstin        | 8 | Franziskus-Hospital Harderberg                                                        |
| 269 | Italy          | Nunzi                | Martina        | 8 | Azienda Ospedaliera Santa Maria Terni                                                 |
| 310 | Poland         | Kukielka-Budny       | Bozena         | 8 | Centrum Onkologii Ziemi Lubelskiej                                                    |
| 335 | Spain          | Rodriguez Sanchez    | Cesar          | 8 | Hospital Universitario de Salamanca - Complejo Asistencial Universitario de Salamanca |
| 347 | Spain          | GONZALEZ CORTIJO     | LUCIA          | 8 | HOSPITAL UNIVERSITARIO QUIRONSALUD MADRID                                             |
| 353 | Spain          | Bermejo de las Heras | Begona         | 8 | Hospital Clínico Universitario de Valencia                                            |
| 354 | Spain          | Ruiz Borrego         | Manuel         | 8 | Hospital Universitario Virgen Del Rocio                                               |
| 408 | United Kingdom | Raja                 | Fharat         | 8 | North Middlesex Hospital                                                              |
| 443 | Brazil         | Linck                | Rudinei        | 8 | Soc. Beneficente de Senhoras Hospital Sirio Libanes-Oncology                          |
| 445 | Brazil         | Brust                | Leandro        | 8 | Hospital Bruno Born                                                                   |
| 453 | Brazil         | Padoan               | Monica Luciana | 8 | Instituto de Educação, Pesquisa e Gestão em Saúde                                     |
| 458 | Brazil         | Testa                | Laura          | 8 | Clinica Onco Star                                                                     |
| 475 | India          | Zehran               | Mohammed       | 8 | Apollo Speciality Hospital - Teynampet                                                |
| 508 | Israel         | Goldvaser            | Hadar          | 8 | Shaare Zedek Medical Center                                                           |
| 517 | Taiwan         | Wang                 | Hwei-Chung     | 8 | China Medical University Hospital                                                     |
| 523 | Taiwan         | Dai                  | Ming-Shen      | 8 | Tri-Service General Hospital                                                          |
| 524 | Taiwan         | Chao                 | Tsu-Yi         | 8 | Taipei Medical University Shuang Ho Hospital                                          |

|     |                       |                   |             |   |                                                    |
|-----|-----------------------|-------------------|-------------|---|----------------------------------------------------|
| 544 | Mexico                | Gutierrez Delgado | Francisco   | 8 | Centro de Estudios y Prevencion del Cancer A.C.    |
| 573 | Australia             | Mok               | Kelly       | 8 | Liverpool Hospital                                 |
| 576 | Australia             | Power             | Jeremy      | 8 | Launceston General Hospital                        |
| 580 | Australia             | Devitt            | Bianca      | 8 | Maroondah Hospital                                 |
| 594 | Korea,<br>Republic of | Park              | Kyong Hwa   | 8 | Korea University Anam Hospital                     |
| 597 | Korea,<br>Republic of | Lee               | Ki Hyeong   | 8 | Chungbuk National University Hospital              |
| 701 | United States         | Dougherty         | Miho        | 8 | Willamette Valley Cancer Institute & Research Ctr. |
| 679 | United States         | Kovoor            | Philip      | 8 | Texas Oncology-Plano West                          |
| 714 | United States         | Moore             | Annette     | 8 | Community Howard Oncology Center                   |
| 716 | United States         | Vaughn            | Christopher | 8 | Hematology Oncology Associates of Fredericksburg   |
| 756 | United States         | Richards          | Donald      | 8 | Texas Oncology - Tyler                             |
| 673 | United States         | Ryan              | Paula       | 8 | Texas Oncology - The Woodlands                     |
| 771 | United States         | Schumaker         | Robert      | 8 | Tennessee Cancer Specialists                       |
| 830 | Japan                 | Kaneko            | Koji        | 8 | Niigata Cancer Center Hospital                     |
| 837 | Japan                 | Niikura           | Naoki       | 8 | Tokai University Hospital- Isehara Campus          |
| 843 | Japan                 | Yonemori          | Kan         | 8 | National Cancer Center Hospital                    |
| 853 | Japan                 | Yanagita          | Yasuhiro    | 8 | Gunma Prefectural Cancer Center                    |
| 885 | Canada                | Hilton            | John        | 8 | The Ottawa Hospital                                |
| 905 | United States         | Sumida            | Kenneth     | 8 | University of Hawaii Cancer Center                 |
| 109 | Denmark               | Lundgaard Riis    | Cathrine    | 7 | Sydvestjysk Sygehus Esbjerg                        |

|     |                    |                    |            |   |                                                           |
|-----|--------------------|--------------------|------------|---|-----------------------------------------------------------|
| 140 | Belgium            | De Cuypere         | Eveline    | 7 | AZ Sint-Jan Brugge-Oostende AV                            |
| 146 | Czech Republic     | Odraska            | Karel      | 7 | Multiscan                                                 |
| 212 | Germany            | Jackisch           | Christian  | 7 | Sana Klinikum Offenbach                                   |
| 241 | Greece             | Baka               | Sofia      | 7 | European Interbalkan Medical Center                       |
| 263 | Italy              | Malaguti           | Paola      | 7 | Istituto Nazionale Tumori Regina Elena                    |
| 270 | Italy              | De Placido         | Sabino     | 7 | Azienda Ospedaliera Universitaria Federico II             |
| 278 | Italy              | De Laurentiis      | Michelino  | 7 | Istituto Nazionale Tumori IRCCS Fondazione Pascale        |
| 279 | Italy              | Torresi            | Rosalba    | 7 | Istituto Clinico Humanitas                                |
| 307 | Poland             | Suszko-Kazarnowicz | Malgorzata | 7 | Olsztyński Ośrodek Onkologiczny Kopernik                  |
| 342 | Spain              | Munoz Mateu        | Montserrat | 7 | Hospital Clinic I Provincial                              |
| 454 | Brazil             | Guedes             | João       | 7 | Hospital de Base Fac de Medicina de Sao Jose do Rio Preto |
| 476 | India              | Kaushal            | Ashish     | 7 | HCG Cancer Centre                                         |
| 483 | India              | Goyal              | Hari       | 7 | Artemis Hospital                                          |
| 485 | India              | Gulia              | Seema      | 7 | Tata Memorial Hospital                                    |
| 548 | Mexico             | Astorga Ramos      | Alma       | 7 | CIMAB SA de CV                                            |
| 579 | Australia          | Devitt             | Bianca     | 7 | Box Hill Hospital Outpatients                             |
| 593 | Korea, Republic of | Kwon               | Kyung A    | 7 | Dongnam Institute of Radiological and Medical Sciences    |
| 631 | Russian Federation | Shirinkin          | Vadim      | 7 | Orenburg Regional Clinical Oncology Dispensary            |
| 657 | United States      | Jain               | Sharad     | 7 | Texas Oncology Denton                                     |



|     |                |             |              |   |                                                               |
|-----|----------------|-------------|--------------|---|---------------------------------------------------------------|
| 735 | United States  | Pham        | Chi          | 7 | Texas Oncology Fort Worth                                     |
| 666 | United States  | Stokoe      | Christopher  | 7 | Texas Oncology-Plano East                                     |
| 676 | United States  | Tedesco     | Karen        | 7 | New York Oncology Hematology, P.C                             |
| 663 | United States  | Thomas      | Vibha        | 7 | Texas Oncology P.A.                                           |
| 765 | United States  | Zelnak      | Amelia       | 7 | Northside Hospital Cancer Institute                           |
| 828 | Japan          | Tsugawa     | Koichiro     | 7 | St. Marianna University Hospital                              |
| 840 | Japan          | Yamamoto    | Yutaka       | 7 | Kumamoto University Hospital                                  |
| 849 | Japan          | Sawaki      | Masataka     | 7 | Aichi Cancer Center Hospital                                  |
| 855 | Japan          | Yamaguchi   | Miki         | 7 | Kurume General Hospital                                       |
| 882 | Canada         | Puchyr      | Martina      | 7 | Humber River Hospital                                         |
| 899 | Spain          | Henao       | Fernando     | 7 | Hospital Universitario Virgen Macarena                        |
| 954 | United States  | Graham II   | Mark         | 7 | Waverly Hematology Oncology                                   |
| 130 | Belgium        | Nuytemans   | Laure        | 6 | AZ Groeninge                                                  |
| 150 | Czech Republic | Smakal      | Martin       | 6 | Nemocnice Horovice                                            |
| 152 | Czech Republic | Holanek     | Milos        | 6 | Masarykuv onkologicky ustav                                   |
| 166 | Finland        | Huovinen    | Riikka       | 6 | Turku University Central Hospital                             |
| 169 | Finland        | Hakkarainen | Heikki       | 6 | Keski-Suomen Keskussairaala                                   |
| 210 | Germany        | Zahm        | Dirk-Michael | 6 | SRH Wald-Klinikum Gera                                        |
| 221 | Germany        | Wuerstlein  | Rachel       | 6 | Klinik & Poliklinik f. Frauenheilkunde & Geburtshilfe der LMU |
| 229 | Germany        | Braun       | Michael      | 6 | Rotkreuzklinikum München - Frauenklinik (Gemeinnützige GmbH)  |

|     |                    |                   |           |   |                                                              |
|-----|--------------------|-------------------|-----------|---|--------------------------------------------------------------|
| 234 | Greece             | Timotheadou       | Eleni     | 6 | General Hospital of Thessaloniki Papageorgiou                |
| 250 | Hungary            | Boer              | Katalin   | 6 | Fovarosi Onkormanyzat Szent Margit Korhaza                   |
| 299 | Portugal           | Carvalho          | Teresa    | 6 | Instituto Português de Oncologia de Coimbra Francisco Gentil |
| 339 | Spain              | Manso Sanchez     | Luis      | 6 | Hospital Universitario 12 de Octubre                         |
| 404 | United Kingdom     | Graham            | Janine    | 6 | University Hospital of North Tees                            |
| 423 | Argentina          | Gomez Abuin       | Gonzalo   | 6 | Hospital Aleman                                              |
| 424 | Argentina          | Kowalyszyn        | Ruben     | 6 | Clinica Viedma S. A                                          |
| 451 | Brazil             | Vieira Alves      | Daniele   | 6 | Instituto de Assistência Médica ao Servidor Público Estadual |
| 457 | Brazil             | de Freitas Junior | Ruffo     | 6 | Hospital Araújo Jorge                                        |
| 460 | Brazil             | Lopes de Paula    | Larissa   | 6 | IBCC - Instituto Brasileiro de Controle do Câncer            |
| 503 | Israel             | Stemmer           | Salomon   | 6 | Rabin Medical Center                                         |
| 543 | Mexico             | Ruiz Garcia       | Abraham   | 6 | Health Pharma Professional Research S.A. de C.V:             |
| 589 | Australia          | Hui               | Rina      | 6 | Westmead Hospital                                            |
| 604 | Korea, Republic of | Kim               | Sung Yong | 6 | Soon Chun Hyang University Cheonan Hospital                  |
| 636 | Russian Federation | Rozhkova          | Irina     | 6 | SHI Kaluga Regional Hospital                                 |
| 651 | United States      | Stillwill         | Joseph    | 6 | Sarah Cannon Research Institute SCRI                         |
| 699 | United States      | Encarnacion       | Carlos    | 6 | Texas Oncology Cancer Care and Research Center               |
| 696 | United States      | Panella           | Timothy   | 6 | University of Tennessee Medical Center                       |
| 723 | United States      | Kaufman           | Peter     | 6 | University of Vermont Medical Center                         |

|     |                |              |            |   |                                                                           |
|-----|----------------|--------------|------------|---|---------------------------------------------------------------------------|
| 802 | New Zealand    | Kuper-Hommel | Marion     | 6 | Waikato Hospital                                                          |
| 818 | Belgium        | Forget       | Frederic   | 6 | Vivalia St Joseph                                                         |
| 834 | Japan          | Aogi         | Kenjiro    | 6 | National Hospital Organization Shikoku Cancer Center                      |
| 842 | Japan          | Mukai        | Hirofumi   | 6 | National Cancer Center Hospital East                                      |
| 892 | Australia      | Loi          | Sherene    | 6 | Peter MacCallum Cancer Centre                                             |
| 910 | United States  | Brufsky      | Adam       | 6 | UPMC Hillman Cancer Center Harrisburg                                     |
| 933 | United States  | Huynh        | Chanh      | 6 | WellSpan Health/York Cancer Center Oncology Research                      |
| 944 | United States  | Moore        | Timothy    | 6 | Columbus Community Clinical Oncology Program                              |
| 964 | Canada         | Patocskai    | Erica      | 6 | Centre Hospitalier de l'Universite de Montreal                            |
| 116 | Austria        | Hubalek      | Michael    | 5 | Private Practice - Dr. Hubalek                                            |
| 119 | Austria        | Bartsch      | Rupert     | 5 | Medinische Universitat Wien Universitatsklinik fur Innere Medizin I       |
| 134 | Belgium        | Petit        | Benedicte  | 5 | Groupe Jolimont                                                           |
| 151 | Czech Republic | Halamka      | Magdalena  | 5 | Fakultni Nemocnice Ostrava                                                |
| 170 | Finland        | Pulkkanen    | Kalevi     | 5 | Satakunta Central Hospital - Oncology                                     |
| 184 | France         | Priou        | Frank      | 5 | CHD Vendee                                                                |
| 187 | France         | Moldovan     | Cristian   | 5 | Centre de Lutte Contre le Cancer - Centre Henri Becquerel Normandie Rouen |
| 192 | France         | Cottu        | Paul Henri | 5 | Institut Curie                                                            |
| 201 | Germany        | Hackmann     | John       | 5 | Marien Hospital Witten                                                    |
| 208 | Germany        | Mayer        | Frank      | 5 | Praxis für Onkologie                                                      |
| 235 | Greece         | Aravantinos  | Gerasimos  | 5 | General Oncology Hospital of Kifissia "Agioli Anargiroi"                  |

|     |                |                  |            |   |                                                                            |
|-----|----------------|------------------|------------|---|----------------------------------------------------------------------------|
| 248 | Hungary        | Nagy             | Zsuzsanna  | 5 | Szent Imre Egyetemi Oktatókórház                                           |
| 260 | Italy          | Airoldi          | Mario      | 5 | Azienda Ospedaliero-Universitaria S.Giovanni Battista                      |
| 267 | Italy          | Del Mastro       | Lucia      | 5 | IRCCS Ospedale Policlinico San Martino                                     |
| 272 | Italy          | Cinieri          | Saverio    | 5 | Ospedale Perrino                                                           |
| 276 | Italy          | Cazzaniga        | Marina     | 5 | ASST Monza - Presidio Ospedaliero di Monza                                 |
| 277 | Italy          | De Giorgi        | Ugo        | 5 | Istituto Scientifico Romagnolo per lo Studio e la Cura dei Tumori          |
| 288 | Netherlands    | Houtsma          | Danny      | 5 | Haga Ziekenhuis locatie Leyweg                                             |
| 303 | Poland         | Ulanska          | Malgorzata | 5 | Centrum Terapii Wspolczesnej J. M. Jasnorzewska Spolka Komandytowo-Akcyjna |
| 320 | Romania        | Alexandru        | Aurelia    | 5 | Institutul Oncologic                                                       |
| 321 | Romania        | Ciubotaru        | Elena      | 5 | Radiology Therapeutic Center                                               |
| 340 | Spain          | Lopez Lopez      | Rafael     | 5 | CHUS - Hospital Clinico Universitario                                      |
| 357 | Sweden         | Nilsson          | Cecilia    | 5 | Västmanlands sjukhus Västerås                                              |
| 383 | Ukraine        | Kovtun           | Vitaliy    | 5 | Poltava Regional Clinical Oncology Center                                  |
| 398 | United Kingdom | Sephton          | Matthew    | 5 | Musgrove Park Hospital                                                     |
| 409 | United Kingdom | Rehman           | Shazza     | 5 | Airedale General Hospital                                                  |
| 415 | United Kingdom | Bezecny          | Pavel      | 5 | Victoria Hospital                                                          |
| 505 | Israel         | Tokar            | Margarita  | 5 | Soroka Medical Center                                                      |
| 520 | Taiwan         | Chen             | Shou-Tung  | 5 | Changhua Christian Hospital                                                |
| 535 | Mexico         | Gomez Villanueva | Angel      | 5 | CENTRO HEMATO ONCOLOGICO PRIVADO                                           |

|     |                    |                   |            |   |                                                              |
|-----|--------------------|-------------------|------------|---|--------------------------------------------------------------|
| 584 | Australia          | Hong              | Hooi       | 5 | Lyell McEwin Hospital                                        |
| 630 | Russian Federation | Nizhegorodtseva   | Aleksandra | 5 | Samara Regional Clinical Oncology Center                     |
| 633 | Russian Federation | Smolin            | Alexey     | 5 | Burdenko Main Military Hospital                              |
| 635 | Russian Federation | Kislov            | Nikolay    | 5 | Yaroslavl region regional clinical oncology hospital         |
| 641 | Saudi Arabia       | Twegieri          | Taher      | 5 | King Faisal Specialist Hospital & Research Center            |
| 658 | United States      | Houck             | William    | 5 | Shenandoah Oncology, P.C.                                    |
| 682 | United States      | Chalasanani       | Pavani     | 5 | The University of Arizona Cancer Center                      |
| 683 | United States      | Costin            | Dan        | 5 | White Plains Hospital                                        |
| 793 | United States      | Meshad            | Michael    | 5 | Southern Cancer Center, P.C.                                 |
| 715 | United States      | Nakajima          | Hikaru     | 5 | St. Luke's Hospital & Health Network                         |
| 720 | United States      | Andreopoulou      | Eleni      | 5 | Weill Cornell Medical College                                |
| 721 | United States      | Unni              | Nisha      | 5 | University of Texas Southwestern Medical Center at Dallas    |
| 728 | United States      | Stringer-Reasor   | Erica      | 5 | University of Alabama Birmingham                             |
| 748 | United States      | Daniel            | Brooke     | 5 | Sarah Cannon Research Institute SCRI                         |
| 763 | United States      | Richards          | Paul       | 5 | Oncology and Hematology Associates of Southwest Virginia Inc |
| 759 | United States      | Swart             | Rachel     | 5 | Arizona Oncology Associates, P.C. - HOPE                     |
| 787 | United States      | Kendall           | Stephan    | 5 | Utah Cancer Specialists                                      |
| 869 | China              | Liao              | Ning       | 5 | Guangdong Provincial People's Hospital                       |
| 896 | Germany            | van Mackelenbergh | Marion     | 5 | Universitätsklinikum Schleswig-Holstein                      |

|     |                |                      |            |   |                                                                           |
|-----|----------------|----------------------|------------|---|---------------------------------------------------------------------------|
| 898 | Portugal       | Cardoso              | Fatima     | 5 | Champalimaud Foundation                                                   |
| 902 | United States  | Tsai                 | Michaela   | 5 | Swedish Medical Center                                                    |
| 903 | United States  | Vemulapalli          | Sunitha    | 5 | Aultman Hospital - Timken Family Cancer Center                            |
| 972 | United States  | Silber               | Andrea     | 5 | Yale University School of Medicine                                        |
| 120 | Austria        | Sevelda              | Paul       | 4 | Krankenhaus Hietzing                                                      |
| 127 | Australia      | Lombard              | Janine     | 4 | Calvary Mater Newcastle                                                   |
| 133 | Belgium        | Jerusalem            | Guy        | 4 | Centre Hospitalier Universitaire Sart Tilman                              |
| 141 | Belgium        | Levacq               | Delphine   | 4 | Hôpital Civil Marie Curie                                                 |
| 142 | Belgium        | Debaere              | Debbie     | 4 | Jan Yperman Ziekenhuis                                                    |
| 182 | France         | Mouret-Reynier       | Marie Ange | 4 | Centre Jean Perrin - Centre Régional de Lutte contre le Cancer d'Auvergne |
| 227 | Germany        | Haenle               | Claudia    | 4 | Klinikum Ludwigsburg                                                      |
| 237 | Greece         | Psyrris              | Amanda     | 4 | ATTIKON GENERAL UNIVERSITY HOSPITAL                                       |
| 246 | Hungary        | Csoszi               | Tibor      | 4 | Jász-Nagykun-Szolnok Megyei Hetényi Géza Kórház                           |
| 261 | Italy          | Frassoldati          | Antonio    | 4 | Azienda Ospedaliero Universitaria di Ferrara                              |
| 289 | Netherlands    | Terpstra             | Wim E      | 4 | Onze Lieve Vrouwe Gasthuis (OLVG)                                         |
| 319 | Romania        | Filip                | Dumitru    | 4 | Oncopremium Team                                                          |
| 330 | Spain          | Moreno Munoz         | Diana      | 4 | Hospital Fundación Alcorcón                                               |
| 338 | Spain          | de la Haba Rodriguez | Juan       | 4 | Hospital Reina Sofia                                                      |
| 417 | United Kingdom | Sutherland           | Stephanie  | 4 | Mount Vernon Hospital                                                     |
| 500 | Israel         | Rasco                | Adi        | 4 | Assaf Harofeh Medical Center                                              |

|     |                       |                |                     |   |                                                                         |
|-----|-----------------------|----------------|---------------------|---|-------------------------------------------------------------------------|
| 506 | Israel                | Perets         | Ruth                | 4 | Rambam Medical Center                                                   |
| 507 | Israel                | Evron          | Ella                | 4 | Kaplan Medical Center                                                   |
| 538 | Mexico                | Reinoso Toledo | Joaquin             | 4 | Joaquin Gabriel Reinoso Toledo (Consultorios de Medicina Especializada) |
| 549 | Mexico                | Molina Alavez  | Alejandro           | 4 | Centro de Atención E Investigación Clínica En Oncología                 |
| 578 | Australia             | Clingan        | Philip              | 4 | Southern Medical Day Care Centre                                        |
| 605 | Korea,<br>Republic of | Chae           | Yee Soo             | 4 | Kyungpook National University Medical Center Chilgok Hospital           |
| 612 | Hong Kong             | Ngan           | Roger Kai<br>Cheong | 4 | Queen Elizabeth Hospital                                                |
| 628 | Russian<br>Federation | Moiseyenko     | Vladimir            | 4 | St-Petersburg scientific practical cente spec medical care              |
| 643 | Saudi Arabia          | Alwbari        | Ahmed               | 4 | King Fahd Specialist Hospital                                           |
| 700 | United States         | Aponte         | Emmalind            | 4 | Texas Oncology - San Antonio Medical Center                             |
| 677 | United States         | Fleischauer    | Scott               | 4 | Texas Oncology - Methodist Dallas Cancer Center                         |
| 760 | United States         | Larson         | Timothy             | 4 | Minnesota Oncology/Hematology PA                                        |
| 680 | United States         | Khalil         | Mazen               | 4 | St. Bernards Medical Center                                             |
| 689 | United States         | Ali            | Muhammad            | 4 | Quincy Medical Group                                                    |
| 691 | United States         | McCune         | Steven              | 4 | Northwest Georgia Oncology Centers                                      |
| 705 | United States         | Papish         | Steven              | 4 | Summit Medical Group Cancer Center                                      |
| 707 | United States         | Russell        | Karen               | 4 | Tallahassee Memorial Cancer Center                                      |
| 713 | United States         | Ortiz          | Taylor              | 4 | Franciscan St. Francis Health                                           |
| 725 | United States         | Rooney         | James               | 4 | Reliant Medical Group, Inc.                                             |

|     |               |             |           |   |                                                                                |
|-----|---------------|-------------|-----------|---|--------------------------------------------------------------------------------|
| 734 | United States | Mita        | Monika    | 4 | Cedars Sinai Medical Center                                                    |
| 667 | United States | Roque       | Tammy     | 4 | Texas Oncology - Denison                                                       |
| 766 | United States | Taylor      | Mark      | 4 | Candler Medical Oncology Practice - Statesboro                                 |
| 665 | United States | Wang        | Grace     | 4 | Miami Cancer Institute at Baptist Health, Inc.                                 |
| 788 | United States | Chandrapaty | Sarat     | 4 | Memorial Sloan Kettering Cancer Center                                         |
| 799 | Portugal      | Costa       | Luis      | 4 | Centro Hospitalar Universitário Lisboa Norte, E.P.E. – Hospital de Santa Maria |
| 854 | Japan         | Shimizu     | Chikako   | 4 | National Center for Global Health and Medicine                                 |
| 862 | China         | Wang        | Yongsheng | 4 | Shandong Cancer Hospital                                                       |
| 863 | China         | Li          | Huiping   | 4 | Beijing Cancer hospital                                                        |
| 875 | China         | Deng        | Yongchuan | 4 | The Second Affiliated Hospital of Zhejiang University School of Medicine       |
| 877 | China         | Lin         | Ying      | 4 | The First Affiliated Hospital, Sun-Yat Sen University                          |
| 880 | Canada        | Yu          | Joanne    | 4 | North York General Hospital                                                    |
| 884 | Canada        | Lee         | Ronita    | 4 | Unity Health Toronto, St. Michael's Hospital                                   |
| 897 | Germany       | Untch       | Michael   | 4 | Helios Klinikum Emil von Behring Berlin-Zehlendorf                             |
| 906 | United States | Melin       | Susan     | 4 | Wake Forest University Health Sciences                                         |
| 952 | United States | Vashist     | Praveen   | 4 | Margaret R. Pardee Memorial Hospital                                           |
| 957 | United States | Bajaj       | Rajesh    | 4 | McLeod Regional Medical Center                                                 |
| 961 | United States | Spell       | Derrick   | 4 | Lady of the Lake Physicians' Group                                             |
| 962 | United States | Koontz      | Michael   | 4 | Pacific Cancer Care                                                            |
| 982 | United States | Durna       | Lara      | 4 | Kaiser Permanente Medical Group                                                |
| 983 | United States | Rao         | Ruta      | 4 | Rush University Medical Center                                                 |



|     |                |                         |             |   |                                                        |
|-----|----------------|-------------------------|-------------|---|--------------------------------------------------------|
| 129 | Portugal       | Gonçalves               | Fernando    | 3 | Centro Hospitalar do Porto - Hospital de Santo António |
| 132 | Belgium        | Altintas                | Sevilay     | 3 | Universitair Ziekenhuis Antwerpen                      |
| 147 | Czech Republic | Buchler                 | Tomas       | 3 | Thomayerova nemocnice                                  |
| 162 | Finland        | Nyandoto                | Paul        | 3 | Päijät-Häme Central hospital                           |
| 181 | France         | Laplaige                | Philippe    | 3 | Polyclinique De Blois                                  |
| 185 | France         | Brocard                 | Fabien      | 3 | Polyclinique de Gentilly                               |
| 217 | Germany        | Fischer von Weikersthal | Ludwig      | 3 | Gesundheitszentrum St. Marien Amberg                   |
| 228 | Germany        | Wimberger               | Pauline     | 3 | Universitätsklinikum Carl Gustav Carus                 |
| 238 | Greece         | Mauri                   | Davide      | 3 | University Hospital of Ioannina                        |
| 240 | Greece         | Christodoulou           | Christos    | 3 | Metropolitan Hospital                                  |
| 336 | Spain          | COLOMER BOSCH           | RAMÓN       | 3 | Hospital La Princesa                                   |
| 345 | Spain          | Lopez Alvarez           | Maria Pilar | 3 | Hospital Universitario Virgen de Valme                 |
| 355 | Sweden         | Andersson               | Anne        | 3 | Norrlands universitetssjukhus                          |
| 377 | Turkey         | Urun                    | Yuksel      | 3 | ANKARA UNIVERSITY MEDICINE HOSPITAL                    |
| 378 | Turkey         | Basaran                 | Gul         | 3 | Acibadem Altunizade Hospital                           |
| 413 | United Kingdom | Hyklova                 | Lucie       | 3 | Boston Pilgrim Hospital                                |
| 414 | United Kingdom | Hamid                   | Abdel       | 3 | Mid Essex Hospital Services NHS Trust                  |
| 455 | Brazil         | Andre Franke            | Fabio       | 3 | Oncosite-Centro de Pesquisa Clinica em Oncologia LTDA  |

|     |                    |                  |             |   |                                                                  |
|-----|--------------------|------------------|-------------|---|------------------------------------------------------------------|
| 539 | Mexico             | Gonzalez Mendoza | Rene        | 3 | Unidad de Investigación en Salud de Chihuahua S.C.               |
| 592 | Korea, Republic of | Lee              | Kyoung Eun  | 3 | Ewha University Mokdong Hospital                                 |
| 624 | Russian Federation | Topuzov          | Eldar       | 3 | North-Western State Medical University named after I.I.Mechnikov |
| 642 | Saudi Arabia       | Altwairqi        | Abdullah    | 3 | King Fahad Medical City                                          |
| 762 | United States      | Danso            | Michael     | 3 | Virginia Oncology Associates                                     |
| 659 | United States      | Kodali           | Dhatri      | 3 | Texas Oncology-Deke Slayton Cancer Center                        |
| 688 | United States      | Chap             | Linnea      | 3 | Beverly Hills Cancer Center                                      |
| 697 | United States      | Levy             | Isaac       | 3 | Millennium Oncology                                              |
| 698 | United States      | Baer             | Lea         | 3 | SUNY At Stony Brook                                              |
| 672 | United States      | Nagaiah          | Govardhanan | 3 | Arizona Oncology Associates, P.C. - HOPE                         |
| 702 | United States      | Hager            | Steven      | 3 | California Cancer Associates Research and Excellence (cCARE)     |
| 726 | United States      | Harris           | Ronald      | 3 | Broome Oncology                                                  |
| 729 | United States      | Wendt            | Albert      | 3 | St Joseph's Hospital and Medical Center                          |
| 749 | United States      | Kingsley         | Clint       | 3 | UT/Erlanger Oncology & Hematology                                |
| 751 | United States      | Battelli         | Chiara      | 3 | New England Cancer Specialists - Scarborough                     |
| 671 | United States      | Sanchez-Rivera   | Ines        | 3 | Texas Oncology - West Texas                                      |
| 784 | United States      | Reganti          | Sowjanya    | 3 | Renown Medical Group                                             |
| 668 | United States      | Ward             | Patrick     | 3 | Oncology Hematology Care Inc                                     |
| 819 | Belgium            | Verhoeven        | Didier      | 3 | AZ Klina                                                         |

|     |               |                                |                  |   |                                                   |
|-----|---------------|--------------------------------|------------------|---|---------------------------------------------------|
| 908 | United States | Daily Weinstein                | Karen            | 3 | University of Southern Florida School of Medicine |
| 934 | United States | Hilton                         | Christie         | 3 | AHN Allegheny General Hospital                    |
| 935 | United States | Bear                           | Harry            | 3 | Virginia Commonwealth University                  |
| 941 | United States | Rachamalla                     | Radhika          | 3 | Vassar Brothers Medical Center                    |
| 960 | United States | McCormack                      | Michael          | 3 | Meritus John Marsh Cancer Center                  |
| 981 | United States | Conlin                         | Alison           | 3 | Providence Cancer Center Oncology Hematology Care |
| 121 | Austria       | Greil                          | Richard          | 2 | Universitätsklinikum Salzburg                     |
| 131 | Belgium       | Graas                          | Marie-Pascale    | 2 | Clinical CHC MontLégia                            |
| 144 | Belgium       | Duhoux                         | Francois         | 2 | Cliniques Universitaires Saint-Luc                |
| 189 | France        | Assaf                          | Elias            | 2 | CHU Henri Mondor                                  |
| 207 | Germany       | Kaczerowsky<br>Flores de Sousa | Anna             | 2 | Kath. Marienkrankenhaus gGmbH                     |
| 220 | Germany       | Fehm                           | Tanja            | 2 | Universitätsklinikum Düsseldorf                   |
| 222 | Germany       | Kaiser                         | Christina        | 2 | Universitätsklinikum Bonn                         |
| 239 | Greece        | Varthalitis                    | Ioannis-Isidoros | 2 | Errikos Dunant Hospital Center                    |
| 242 | Greece        | Linardou                       | Helena           | 2 | Metropolitan Hospital                             |
| 251 | Hungary       | Toth                           | Eva Katalin      | 2 | SE Belgyogyaszati és Hematologiai Klinika         |
| 268 | Italy         | Ferro                          | Antonella        | 2 | APSS- Presidio Ospedaliero S. Chiara              |
| 271 | Italy         | Mazzuca                        | Federica         | 2 | Policlinico Ospedale S. Andrea                    |
| 346 | Spain         | Fernandez Perez                | Yolanda          | 2 | Hospital Universitario Central de Asturias        |
| 351 | Spain         | Servitja Tormo                 | Sonia            | 2 | Hospital del Mar                                  |

|     |                    |              |                                   |   |                                                       |
|-----|--------------------|--------------|-----------------------------------|---|-------------------------------------------------------|
| 356 | Sweden             | Wennstig     | Anna-Karin                        | 2 | Sundsvalls Sjukhus                                    |
| 359 | Sweden             | Bosch-Campos | Ana                               | 2 | Skånes universitetssjukhus Lund                       |
| 399 | United Kingdom     | Khan         | Sarah                             | 2 | City Hospital, Nottingham University Hospitals        |
| 416 | United Kingdom     | Wheatley     | Duncan                            | 2 | The Royal Cornwall Hospital                           |
| 435 | Argentina          | Cundom       | Juan Esteban                      | 2 | Instituto de Investigaciones Metabolicas              |
| 477 | India              | Goswami      | Chanchal                          | 2 | Medica Superspecialty Hospital                        |
| 479 | India              | Patil        | Poonam                            | 2 | Manipal Hospital                                      |
| 492 | India              | Mahato       | Pinaki                            | 2 | HCG Cancer Centre                                     |
| 493 | India              | Dodagoudar   | Chandragouda                      | 2 | Dr B. L. Kapur Memorial Hospital                      |
| 494 | India              | Muralidhar   | Muddusetty                        | 2 | MNJ Institute of Oncology                             |
| 556 | South Africa       | Kraus        | Peter                             | 2 | GVI Oncology                                          |
| 559 | South Africa       | Slabber      | Coenraad                          | 2 | Mary Potter Oncology Center                           |
| 560 | South Africa       | Tabane       | Neonyana<br>Keorapetse<br>Rebecca | 2 | Sandton Oncology Centre                               |
| 613 | Hong Kong          | Soong        | Inda Sung                         | 2 | Pamela Youde Nethersole Eastern Hospital              |
| 627 | Russian Federation | Fadeeva      | Natalia                           | 2 | Chelyabinsk Regional Clinical Oncology Dispensary     |
| 640 | Saudi Arabia       | Abdelhafiez  | Nafisa                            | 2 | King Abdulaziz Medical City - National Guard Hospital |
| 678 | United States      | Campos       | Maria                             | 2 | Sansum Clinic                                         |
| 761 | United States      | Christensen  | Stephani                          | 2 | Comprehensive Cancer Centers of Nevada                |

|     |               |                |               |   |                                                                                                                                             |
|-----|---------------|----------------|---------------|---|---------------------------------------------------------------------------------------------------------------------------------------------|
| 664 | United States | Vasudevan      | Anju          | 2 | Ocala Oncology, P.A.                                                                                                                        |
| 660 | United States | Fleischauer    | Scott         | 2 | Texas Oncology-Arlington South                                                                                                              |
| 785 | United States | Jones          | Monte         | 2 | Texas Oncology - McKinney                                                                                                                   |
| 684 | Puerto Rico   | Hunter Mellado | Robert        | 2 | Puerto Rico Hematology/Oncology Group                                                                                                       |
| 692 | United States | Graham         | Bobby         | 2 | Jackson Oncology Associates, PLLC                                                                                                           |
| 710 | United States | Kosmo          | Michael       | 2 | California Cancer Associates in Research and Excellence                                                                                     |
| 717 | Puerto Rico   | Mora           | Edna          | 2 | University Of Puerto Rico                                                                                                                   |
| 718 | United States | Alexander      | Michael       | 2 | Dominican Hospital                                                                                                                          |
| 719 | United States | Bahadur        | Shakeela      | 2 | Banner MD Anderson Cancer Center                                                                                                            |
| 753 | United States | Lathrop        | Kate          | 2 | University of Texas Health Science Center - San Antonio                                                                                     |
| 780 | United States | Sinclair       | Sarah         | 2 | Eastern Maine Medical Center                                                                                                                |
| 841 | Japan         | Komoike        | Yoshifumi     | 2 | Kindai University Hospital                                                                                                                  |
| 881 | Canada        | Roy            | Josee-Anne    | 2 | Centre intégré universitaire de santé et de services sociaux du Nord-de-l'Île-de-Montréal (CIUSSS NÎM) - Hôpital du Sacré-Coeur de Montréal |
| 894 | Germany       | Fuchs          | Roswitha      | 2 | Gemeinschaftspraxis für Hämatologie und Onkologie                                                                                           |
| 936 | United States | Hathaway       | Amanda        | 2 | Spartanburg Regional Medical Center                                                                                                         |
| 945 | United States | Sanford        | Amy           | 2 | Sanford Research/USD                                                                                                                        |
| 949 | United States | Shipstone      | Asheesh       | 2 | Indian Path Community Hospital                                                                                                              |
| 959 | United States | Leu            | Kirsten       | 2 | Nebraska Methodist Cancer Center                                                                                                            |
| 963 | United States | Grussie        | Erwin         | 2 | Providence St. Joseph's Medical Center                                                                                                      |
| 966 | Canada        | Boileau        | Jean-Francois | 2 | Jewish General Hospital                                                                                                                     |

|     |                    |                 |            |   |                                                                                                         |
|-----|--------------------|-----------------|------------|---|---------------------------------------------------------------------------------------------------------|
| 971 | United States      | Otis            | Stavroula  | 2 | St. Joseph Hospital                                                                                     |
| 973 | United States      | Suresh          | Pooja      | 2 | Abington Memorial Hospital                                                                              |
| 980 | United States      | Mortimer        | Joanne     | 2 | City of Hope National Medical Center                                                                    |
| 126 | Australia          | Boyce           | Adam       | 1 | Lismore Base Hospital                                                                                   |
| 128 | Australia          | Jennens         | Ross       | 1 | Epworth Research Institute                                                                              |
| 137 | Belgium            | DHondt          | Lionel     | 1 | Université Catholique de Louvain-Namur - Centre Hospitalier Universitaire Dinant-Godinne - Site Godinne |
| 188 | France             | Tredan          | Olivier    | 1 | CENTRE LEON BERARD                                                                                      |
| 226 | Germany            | Stang           | Axel       | 1 | MVZ Onkologie Barmbek - Asklepios Klinik Barmbek                                                        |
| 265 | Italy              | Farina          | Gabriella  | 1 | Osepdale Fatebenefratelli e Oftalmico                                                                   |
| 290 | Netherlands        | Kitzen          | Jos        | 1 | Albert Schweitzer Ziekenhuis                                                                            |
| 308 | Poland             | Karaszewska     | Boguslawa  | 1 | Przychodnia Lekarska KOMED                                                                              |
| 432 | Argentina          | Silva           | Carlos     | 1 | Hospital Universitario Austral                                                                          |
| 515 | Taiwan             | Liu             | Chien-Ting | 1 | Chang Gung Memorial Hospital - Kaohsiung Branch                                                         |
| 532 | Mexico             | Pacheco Perez   | Rodrigo    | 1 | Medical Care and Research SA de CV                                                                      |
| 555 | South Africa       | Coccia-Portugal | Maria      | 1 | Eastleigh Breast Care Center                                                                            |
| 557 | South Africa       | Crockett        | John       | 1 | Langenhoven Drive Oncology Centre                                                                       |
| 558 | South Africa       | Maurel          | Jean-Marc  | 1 | Cancercare Rondebosch Oncology                                                                          |
| 566 | Germany            | Kiewe           | Philipp    | 1 | Medizinisches Versorgungszentrum Onkologischer Schwerpunkt am Oskar-Helene-Heim                         |
| 600 | Korea, Republic of | Lee             | Sung Sook  | 1 | Inje University Haeundae Paik Hospital                                                                  |

|     |                    |                |            |   |                                                       |
|-----|--------------------|----------------|------------|---|-------------------------------------------------------|
| 610 | Hong Kong          | Ng             | Ting Ying  | 1 | Tuen Mun Hospital                                     |
| 621 | Russian Federation | Lifirenko      | Igor       | 1 | Kursk Regional Oncology Dispensary                    |
| 661 | United States      | Courtright     | Jay        | 1 | Texas Oncology - Medical City Dallas                  |
| 781 | United States      | Haffar         | Shiela     | 1 | Texas Oncology- Mesquite                              |
| 662 | United States      | Klein          | Leonard    | 1 | Illinois Cancer Specialists                           |
| 681 | United States      | Nikolinakos    | Petros     | 1 | University Cancer & Blood Center, LLC                 |
| 708 | United States      | Riley          | Elizabeth  | 1 | Univ of Louisville School of Medicine                 |
| 724 | United States      | Schwartz       | Gary       | 1 | Dartmouth-Hitchcock Medical Center                    |
| 731 | United States      | Erickson       | Nicholette | 1 | Central Maine Medical Center                          |
| 733 | United States      | Hassan         | Hassan     | 1 | Cancer Specialists of North Florida -St Augustine     |
| 675 | United States      | Prakash        | Sucharu    | 1 | Texas Oncology - Paris                                |
| 752 | United States      | Sanchez-Rivera | Ines       | 1 | Texas Oncology - West Texas                           |
| 769 | United States      | Northfelt      | Donald     | 1 | Mayo Clinic Hospital                                  |
| 776 | United States      | Moreno-Aspitia | Alvaro     | 1 | Mayo Clinic in Florida                                |
| 786 | United States      | Byron          | Elisabeth  | 1 | Sarah Cannon Research Institute SCRI                  |
| 846 | Japan              | Kawashima      | Masahiro   | 1 | Kyoto University Hospital                             |
| 883 | Canada             | Pavic          | Michel     | 1 | Centre Hospitalier Universitaire de Sherbrooke - CHUS |
| 900 | United States      | Schleicher     | Lori       | 1 | Newark Beth Israel Medical Center                     |
| 901 | United States      | Tang           | Horace     | 1 | Community Medical Center                              |
| 939 | United States      | Owusu          | Cynthia    | 1 | University Hospitals Cleveland Medical Center         |

|     |               |             |           |   |                                           |
|-----|---------------|-------------|-----------|---|-------------------------------------------|
| 946 | United States | Bansal      | Meghana   | 1 | MultiCare Regional Cancer Center - Auburn |
| 947 | United States | Avery       | Eric      | 1 | Cancer Alliance of Nebraska               |
| 955 | United States | Dyar        | Stephen   | 1 | St Francis Cancer Center                  |
| 968 | United States | Hantel      | Alexander | 1 | Edward Cancer Center                      |
| 975 | United States | Manthri     | Sukesh    | 1 | Terrebonne General Medical Center         |
| 977 | United States | Vanderwalde | Ari       | 1 | The West Clinic                           |
